# Supplementary material for: Photoredox radical cyclization reaction of o-vinylaryl isocyanides with acyl chlorides to access 2,4-disubstituted quinolines
Source: Royal Society of Chemistry journal article supplement (doi:10.1039/d3ob01915b), 2023-12-18

# Supporting Information

## Photoredox Radical Cascade Reaction of *o*-Vinylaryl Isocyanides with Acyl Chlorides to Access 2,4-Disubstituted Quinolines

Peng-Fei Huang,\* Jia-Le Fu, Jia-Jing Huang, Bi-Quan Xiong, Ke-Wen Tang, Yu Liu\*

Department of Chemistry and Chemical Engineering, Hunan Institute of Science and  
Technology, Yueyang 414006, China

12021027@hnist.edu.cn (Peng-Fei Huang) and lyxtmj\_613@163.com (Yu Liu)

### List of Contents

|                                                              |                |
|--------------------------------------------------------------|----------------|
| <b>1. General Information</b>                                | <b>S1</b>      |
| <b>2. Experimental Section</b>                               | <b>S1-S11</b>  |
| <b>2.1 General Procedure for the Synthesis of Substrates</b> | <b>S1-S1</b>   |
| <b>2.2 Details of Visible-Light Source</b>                   | <b>S1-S2</b>   |
| <b>2.3 Control Experiments</b>                               | <b>S2-S11</b>  |
| <b>2.4 The Light on/off Experiments</b>                      | <b>S11-S12</b> |
| <b>3. Reference</b>                                          | <b>S12</b>     |
| <b>4. Spectra</b>                                            | <b>S13-S87</b> |

## 1. General Information

Unless otherwise stated, all commercial reagents were used as received. Propiophenone, aldehydes (Innochem, >98%), *o*-Phenylenediamine and Phenylhydrazine hydrochloride were used without further treatment. All reagents and solvents were commercially available and used without any further purification unless specified. All solvents were dried and distilled according to standard procedures. Flash column chromatography was performed using silica gel (0.25mm, 300-400 mesh). Analytical thin-layer chromatography was performed using glass plates pre-coated with 0.25mm 300-400 mesh silica gel impregnated with a fluorescent indicator (254 nm). All reactions were carried out with magnetic stirring and in dried glassware. Nuclear magnetic resonance (NMR) spectra are recorded in parts per million from internal tetramethylsilane on the  $\delta$  scale.  $^1\text{H}$  NMR,  $^{19}\text{F}$  NMR and  $^{13}\text{C}$  NMR spectra were recorded in  $\text{CDCl}_3$  on a Bruker DRX-400 spectrometer operating at 400 MHz, 282 MHz and 100 MHz, respectively. All chemical shift values are quoted in ppm and coupling constants quoted in Hz. The solvent peak was used as a reference value, for  $^1\text{H}$  NMR: TMS = 0.00 ppm, for  $^{13}\text{C}$  NMR:  $\text{CDCl}_3$  = 77.00 ppm. The following abbreviations were used to explain multiplicities: s = singlet, d = doublet, dd = doublet of doublet, t = triplet, td = triplet of doublet, q = quartet, m = multiplet, and br = broad. High-resolution mass spectra (HRMS) were obtained on an Agilent mass spectrometer using ESI-TOF (electrospray ionization-time of flight).

## 2. Experiment Section

### 2.1 General Procedure for the Synthesis of Substrates

1-Isocyano-2-(1-phenylvinyl)benzene **1** was synthesized according to the known methods<sup>[1]</sup>.

### 2.2 Details of Visible-Light Source

The light source bought from SANYI ([https://item.taobao.com/item.htm?spm=a1z09.2.0.0.42672e8dv2Chsz&id=35497290577&\\_u=j35sh1qt9325](https://item.taobao.com/item.htm?spm=a1z09.2.0.0.42672e8dv2Chsz&id=35497290577&_u=j35sh1qt9325)), 5 W blue LED light bulb (E27). The wavelength was about

460-470 nm and the wavelength of peak intensity was about 467.5 nm. The picture of the experimental facility was shown as follow:

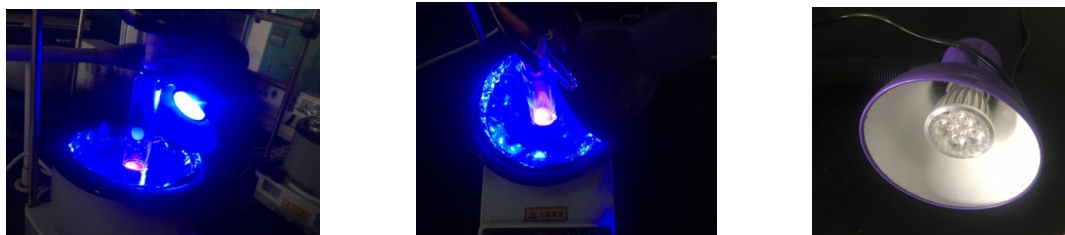

**Figure S1.** Pictures of Visible-Light Source. Reproduced from [Liu, Y.; Wang, Q.-L.; Chen, Z.; Zhou, Q.; Li, H.; Zhou, C.-S.; Xiong, B.-Q.; Zhang, P.-L.; and Tang, K.-W.; Visible-Light-Catalyzed C–C Bond Difunctionalization of Methylene cyclopropanes with Sulfonyl Chlorides for the Synthesis of 3-Sulfonyl-1,2-dihydronaphthalenes, *J. Org. Chem.* **2019**, *84*, 2829-2839]. Copyright [2019] American Chemical Society

## 2.3 Control Experiments

### 2.3.1 GC-MS Analysis of Raw Reaction Mixture by Using TEMPO as Radical Inhibitor

Inhibitor

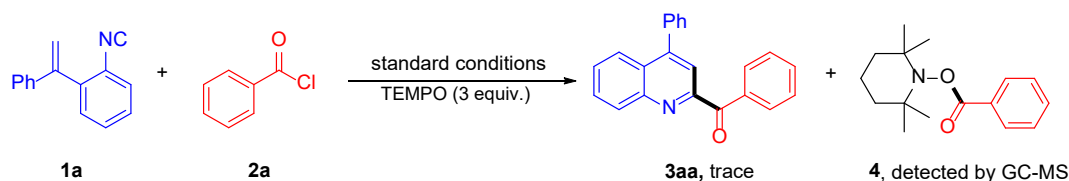

To a Schlenk tube were added 1-isocyano-2-(1-phenylvinyl)benzene **1a** (0.2 mmol), benzoyl chloride **2a** (6 mmol, 3 equiv), Ir(ppy)<sub>3</sub> (1 mol%), 2,6-lutidine (0.8 mmol, 4 equiv.), TEMPO (3 equiv), CH<sub>3</sub>CN (2 mL) at room temperature and 5 W blue LED irradiation for 12 h. The GC-MS analysis of raw reaction mixture showed that only trace amounts of the target product **3aa** was detected. The acyl radical trapping product **4**, which generated from TEMPO capturing the acyl radical, could be detected by GC-MS analysis.

**The GC-MS analysis results of raw reaction mixture**

**The GC spectra of raw reaction mixture**

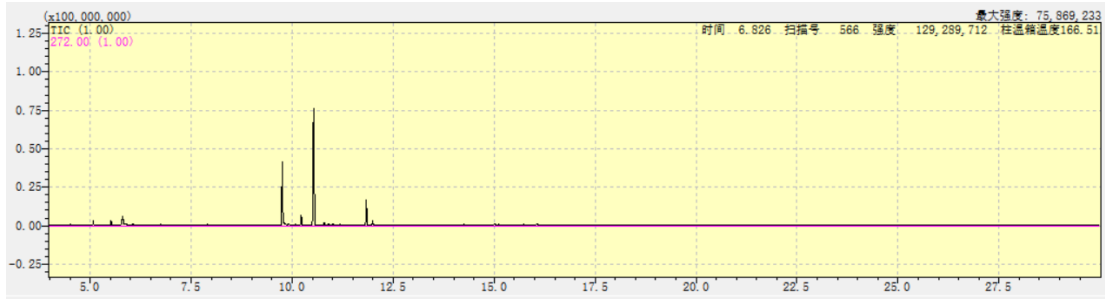

**The MS spectra of the peak at 10.53 min**

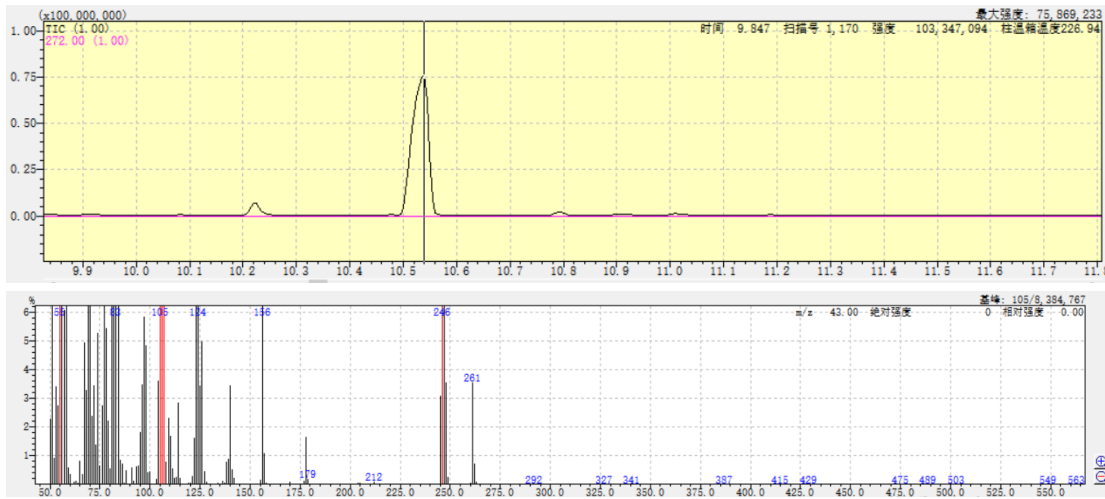

|                               |         |          |          |         |          |        |          |      |
|-------------------------------|---------|----------|----------|---------|----------|--------|----------|------|
| [MS Spectrum]                 | 60.00   | 31847    | 0.38     | 81.05   | 944251   | 11.26  |          |      |
| # of Peaks                    | 546     | 61.00    | 26870.03 | 82.10   | 802929   | 9.58   |          |      |
| Raw Spectrum 10.540 (scan :   | 62.00   | 72790.09 | 83.05    | 6841848 | 81.60    |        |          |      |
| 1309)                         | 62.95   | 11286    | 0.13     | 84.05   | 901507   | 10.75  |          |      |
| Background No                 | 64.05   | 64100.08 | 85.05    | 72256   | 0.86     |        |          |      |
| Background Spectrum           | 65.00   | 69833    | 0.83     | 86.05   | 62159    | 0.74   |          |      |
| Base Peak m/z 104.95 (Inten : | 66.05   | 30959    | 0.37     | 87.05   | 63400.08 |        |          |      |
| 8,384,767)                    | 67.00   | 416017   | 4.96     | 88.05   | 40669    | 0.49   |          |      |
| Event# 1                      | 68.05   | 276471   | 3.30     | 89.05   | 35860.04 |        |          |      |
| m/z Absolute Intensity        | 69.00   | 3041140  | 36.27    | 90.05   | 17420.02 |        |          |      |
| Relative Intensity            | 70.05   | 852154   | 10.16    | 91.05   | 50049    | 0.60   |          |      |
| 50.00                         | 193502  | 2.31     | 71.05    | 201337  | 2.40     | 92.05  | 12378    | 0.15 |
| 50.95                         | 998132  | 11.90    | 72.05    | 291571  | 3.48     | 93.05  | 53806    | 0.64 |
| 52.05                         | 78758   | 0.94     | 73.05    | 117525  | 1.40     | 94.05  | 56033    | 0.67 |
| 53.00                         | 286834  | 3.42     | 74.00    | 445073  | 5.31     | 95.05  | 152555   | 1.82 |
| 54.05                         | 231648  | 2.76     | 75.00    | 56151   | 0.67     | 96.05  | 293878   | 3.50 |
| 55.00                         | 7926265 | 94.53    | 76.05    | 231665  | 2.76     | 97.05  | 490760   | 5.85 |
| 56.00                         | 3159524 | 37.68    | 77.00    | 6289020 | 75.01    | 98.10  | 409622   | 4.89 |
| 57.05                         | 512937  | 6.12     | 78.00    | 457689  | 5.46     | 99.10  | 36799    | 0.44 |
| 58.00                         | 1073834 | 12.81    | 79.00    | 188367  | 2.25     | 100.05 | 39560    | 0.47 |
| 59.00                         | 49290   | 0.59     | 80.05    | 48237   | 0.58     | 100.90 | 28920.03 |      |

|        |               |        |        |              |  |        |          |
|--------|---------------|--------|--------|--------------|--|--------|----------|
| 101.95 | 28270.03      |        | 146.05 | 12000.01     |  | 190.00 | 11260.01 |
| 102.95 | 17651         | 0.21   | 147.05 | 25910.03     |  | 190.95 | 512 0.01 |
| 103.95 | 303938        | 3.62   | 148.00 | 999 0.01     |  | 191.90 | 542 0.01 |
| 104.95 | 8384767       | 100.00 | 149.00 | 460 0.01     |  | 192.95 | 10510.01 |
| 105.90 | 8382526       | 99.97  | 150.05 | 10470.01     |  | 194.00 | 726 0.01 |
| 106.85 | 1648731       | 19.66  | 151.00 | 978 0.01     |  | 194.95 | 315 0.00 |
| 108.10 | 65708         | 0.78   | 152.00 | 15660.02     |  | 196.00 | 417 0.00 |
| 109.10 | 195321        | 2.33   | 153.00 | 818 0.01     |  | 197.00 | 582 0.01 |
| 110.10 | 141446        | 1.69   | 154.05 | 29600.04     |  | 197.95 | 395 0.00 |
| 111.10 | 46406         | 0.55   | 155.15 | 12528 0.15   |  | 198.90 | 442 0.01 |
| 112.10 | 18025         | 0.21   | 156.10 | 878561 10.48 |  | 200.00 | 886 0.01 |
| 113.15 | 20893         | 0.25   | 157.05 | 92699 1.11   |  | 200.95 | 556 0.01 |
| 114.10 | 239329        | 2.85   | 158.05 | 65610.08     |  | 202.00 | 548 0.01 |
| 115.10 | 19610         | 0.23   | 159.05 | 36280.04     |  | 203.00 | 11620.01 |
| 116.05 | 29910.04      |        | 159.95 | 13340.02     |  | 204.00 | 61350.07 |
| 117.05 | 38240.05      |        | 160.95 | 780 0.01     |  | 204.95 | 56100.07 |
| 118.10 | 23690.03      |        | 162.00 | 16700.02     |  | 206.00 | 16380.02 |
| 119.05 | 40980.05      |        | 163.05 | 656 0.01     |  | 206.95 | 28940.03 |
| 120.05 | 57700.07      |        | 164.00 | 300 0.00     |  | 207.95 | 545 0.01 |
| 121.15 | 25819 0.31    |        | 165.00 | 999 0.01     |  | 208.95 | 392 0.00 |
| 122.05 | 137207 1.64   |        | 166.00 | 377 0.00     |  | 209.90 | 225 0.00 |
| 123.10 | 1123894 13.40 |        | 167.00 | 273 0.00     |  | 211.00 | 228 0.00 |
| 124.10 | 1390618 16.59 |        | 167.95 | 12670.02     |  | 212.00 | 72570.09 |
| 125.10 | 289447 3.45   |        | 169.05 | 812 0.01     |  | 213.00 | 14070.02 |
| 126.10 | 420102 5.01   |        | 170.00 | 74780.09     |  | 214.00 | 10380.01 |
| 127.10 | 39167 0.47    |        | 171.05 | 23670.03     |  | 215.05 | 569 0.01 |
| 128.10 | 72970.09      |        | 172.00 | 31400.04     |  | 216.00 | 231 0.00 |
| 129.05 | 19760.02      |        | 173.05 | 10880.01     |  | 216.95 | 586 0.01 |
| 130.00 | 14710.02      |        | 174.00 | 574 0.01     |  | 218.00 | 25780.03 |
| 131.05 | 20940.02      |        | 175.05 | 371 0.00     |  | 219.00 | 13700.02 |
| 131.95 | 13760.02      |        | 176.05 | 16740.02     |  | 219.90 | 662 0.01 |
| 133.05 | 16570.02      |        | 177.05 | 98420.12     |  | 220.90 | 431 0.01 |
| 134.05 | 54120.06      |        | 178.00 | 140374 1.67  |  | 221.90 | 250 0.00 |
| 135.05 | 35160.04      |        | 179.00 | 16908 0.20   |  | 222.90 | 132 0.00 |
| 136.10 | 12070 0.14    |        | 179.95 | 25920.03     |  | 223.90 | 111 0.00 |
| 137.15 | 61150.07      |        | 180.95 | 476 0.01     |  | 224.90 | 134 0.00 |
| 138.05 | 66730 0.80    |        | 181.95 | 590 0.01     |  | 225.90 | 302 0.00 |
| 139.10 | 75186 0.90    |        | 182.90 | 177 0.00     |  | 227.00 | 175 0.00 |
| 140.10 | 290004 3.46   |        | 183.90 | 294 0.00     |  | 227.95 | 13440.02 |
| 141.10 | 45326 0.54    |        | 184.90 | 223 0.00     |  | 229.00 | 462 0.01 |
| 142.05 | 20412 0.24    |        | 186.00 | 564 0.01     |  | 230.00 | 38760.05 |
| 143.10 | 23480.03      |        | 187.05 | 712 0.01     |  | 230.95 | 613 0.01 |
| 144.00 | 871 0.01      |        | 188.00 | 23020.03     |  | 231.90 | 566 0.01 |
| 145.00 | 22020.03      |        | 188.95 | 789 0.01     |  | 232.90 | 241 0.00 |

|        |          |      |        |          |       |               |                 |             |
|--------|----------|------|--------|----------|-------|---------------|-----------------|-------------|
| 233.90 | 82       | 0.00 | 246.05 | 8377313  | 99.91 | 258.00        | 162             | 0.00        |
| 234.90 | 178      | 0.00 | 247.05 | 2906641  | 34.67 | 259.00        | 58              | 0.00        |
| 235.90 | 377      | 0.00 | 248.00 | 299668   | 3.57  | <b>260.15</b> | <b>40900.05</b> |             |
| 236.90 | 164      | 0.00 | 249.00 | 23406    | 0.28  | <b>261.05</b> | <b>298960</b>   | <b>3.57</b> |
| 237.90 | 100      | 0.00 | 249.95 | 17540.02 |       | <b>262.05</b> | <b>62278</b>    | <b>0.74</b> |
| 238.90 | 90       | 0.00 | 251.00 | 375      | 0.00  | 263.00        | 77460.09        |             |
| 239.90 | 70       | 0.00 | 252.00 | 191      | 0.00  | 264.05        | 10580.01        |             |
| 240.90 | 129      | 0.00 | 253.00 | 241      | 0.00  | 265.00        | 334             | 0.00        |
| 242.05 | 512      | 0.01 | 254.00 | 137      | 0.00  | 266.00        | 116             | 0.00        |
| 243.05 | 302      | 0.00 | 255.00 | 97       | 0.00  | 266.95        | 558             | 0.01        |
| 244.15 | 22930.03 |      | 256.00 | 16810.02 |       | 267.90        | 177             | 0.00        |
| 245.15 | 260429   | 3.11 | 257.00 | 346      | 0.00  | 268.90        | 226             | 0.00        |

### 2.3.2 GC-MS Analysis of Raw Reaction Mixture by Using BHT as Radical Inhibitor

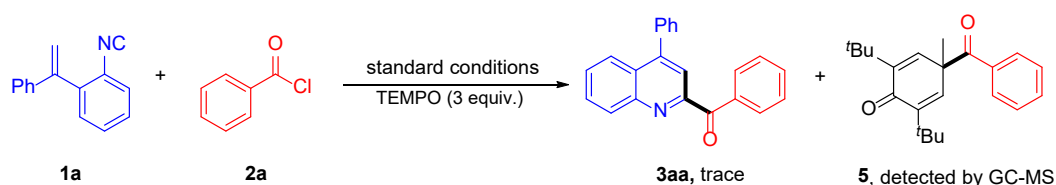

To a Schlenk tube were added 1-isocyano-2-(1-phenylvinyl)benzene **1a** (0.2 mmol), benzoyl chloride **2a** (6 mmol, 3 equiv), Ir(ppy)<sub>3</sub> (1 mol%), 2,6-lutidine (0.8 mmol, 4 equiv.), BHT (3 equiv), CH<sub>3</sub>CN (2 mL) at room temperature and 5 W blue LED irradiation for 12 h. The GC-MS analysis of raw reaction mixture showed that only trace amounts of the target product **3aa** was detected. The acyl radical trapping product **5**, which generated from BHT capturing the acyl radical, could be detected by GC-MS analysis.

#### The GC-MS analysis results of raw reaction mixture

##### The GC spectra of raw reaction mixture

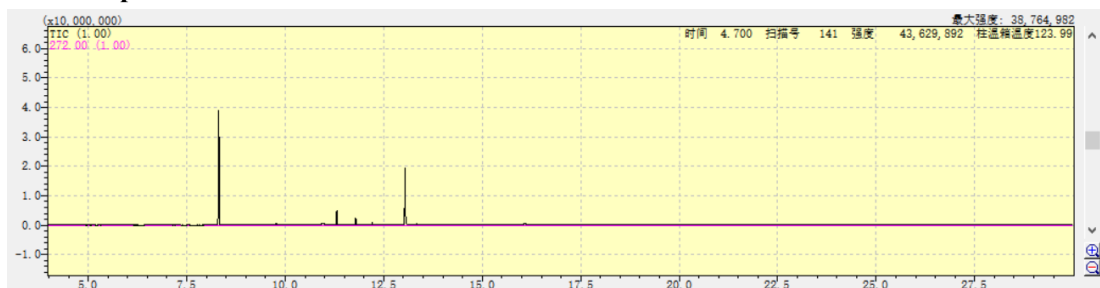

##### The MS spectra of the peak at 13.04 min

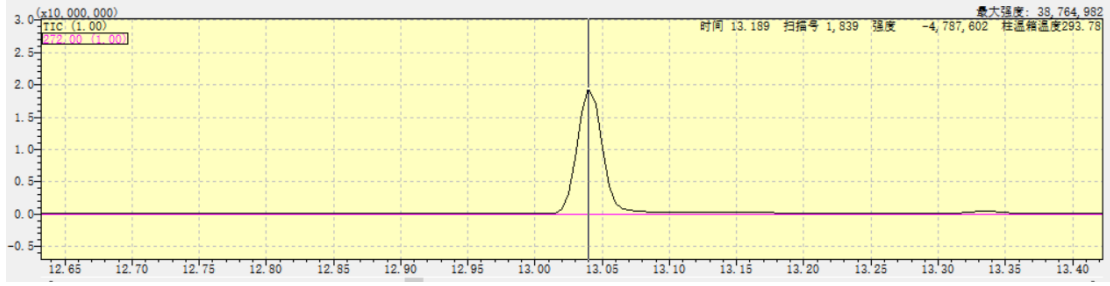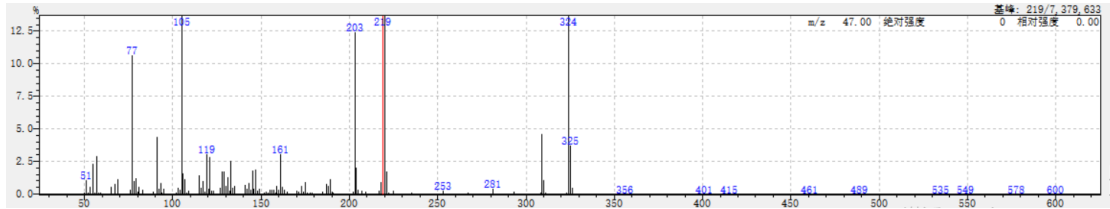

|                     |                                |          |          |          |         |          |          |      |
|---------------------|--------------------------------|----------|----------|----------|---------|----------|----------|------|
| [MS Spectrum]       | 70.95                          | 31020.04 | 103.05   | 39503    | 0.54    |          |          |      |
| # of Peaks          | 539                            | 72.05    | 13990.02 | 104.05   | 27761   | 0.38     |          |      |
| Raw Spectrum        | 13.040 (scan : 1809)           | 72.95    | 62870.09 | 105.00   | 1433650 | 19.43    |          |      |
| Background          | No                             | 73.95    | 26780.04 | 106.00   | 120100  | 1.63     |          |      |
| Background Spectrum |                                | 75.05    | 56090.08 | 107.05   | 88718   | 1.20     |          |      |
| Base Peak           | m/z 219.10 (Inten : 7,379,633) | 76.05    | 25759    | 0.35     | 108.05  | 10840    | 0.15     |      |
| Event#              | 1                              | 77.00    | 791783   | 10.73    | 109.05  | 21635    | 0.29     |      |
| m/z                 | Absolute Intensity             | 78.00    | 74266    | 1.01     | 110.10  | 25910.04 |          |      |
|                     | Relative Intensity             | 79.05    | 90303    | 1.22     | 111.05  | 23120.03 |          |      |
| 50.00               | 11537                          | 0.16     | 82.05    | 49590.07 | 114.05  | 21100.03 |          |      |
| 51.00               | 84015                          | 1.14     | 83.00    | 26233    | 0.36    | 115.05   | 106839   | 1.45 |
| 52.00               | 10804                          | 0.15     | 84.00    | 20260.03 |         | 116.05   | 37959    | 0.51 |
| 53.00               | 44962                          | 0.61     | 85.10    | 13100.02 |         | 117.05   | 76011    | 1.03 |
| 54.05               | 47680.06                       |          | 85.95    | 757      | 0.01    | 118.15   | 16738    | 0.23 |
| 55.00               | 176780                         | 2.40     | 87.05    | 17210.02 |         | 119.05   | 225869   | 3.06 |
| 56.05               | 13536                          | 0.18     | 88.05    | 21090.03 |         | 120.10   | 33698    | 0.46 |
| 57.00               | 216455                         | 2.93     | 89.00    | 13862    | 0.19    | 121.05   | 212005   | 2.87 |
| 58.00               | 11246                          | 0.15     | 90.05    | 59960.08 |         | 122.05   | 21553    | 0.29 |
| 59.00               | 10884                          | 0.15     | 91.00    | 325230   | 4.41    | 123.05   | 22868    | 0.31 |
| 60.05               | 599                            | 0.01     | 92.05    | 31772    | 0.43    | 124.10   | 25560.03 |      |
| 61.05               | 309                            | 0.00     | 93.05    | 65262    | 0.88    | 125.05   | 11720.02 |      |
| 61.95               | 10450.01                       |          | 94.05    | 11387    | 0.15    | 126.05   | 28650.04 |      |
| 63.00               | 74970.10                       |          | 95.05    | 30685    | 0.42    | 127.05   | 35968    | 0.49 |
| 64.05               | 44790.06                       |          | 96.05    | 52290.07 |         | 128.05   | 130389   | 1.77 |
| 65.00               | 43562                          | 0.59     | 97.05    | 68960.09 |         | 129.05   | 133212   | 1.81 |
| 66.00               | 65480.09                       |          | 98.00    | 705      | 0.01    | 130.05   | 47160    | 0.64 |
| 67.00               | 59321                          | 0.80     | 99.00    | 454      | 0.01    | 131.05   | 98909    | 1.34 |
| 68.05               | 40030.05                       |          | 100.05   | 555      | 0.01    | 132.10   | 23439    | 0.32 |
| 69.00               | 86988                          | 1.18     | 101.00   | 42580.06 |         | 133.05   | 188145   | 2.55 |
| 70.00               | 53560.07                       |          | 102.00   | 92460.13 |         | 134.05   | 37000    | 0.50 |

|        |             |      |        |                |      |        |            |
|--------|-------------|------|--------|----------------|------|--------|------------|
| 135.10 | 47825       | 0.65 | 179.00 | 10823          | 0.15 | 223.00 | 72360.10   |
| 136.05 | 60610.08    |      | 180.05 | 31070.04       |      | 224.05 | 17380.02   |
| 137.10 | 22600.03    |      | 181.00 | 69860.09       |      | 225.00 | 22553 0.31 |
| 138.05 | 442 0.01    |      | 181.95 | 19930.03       |      | 226.00 | 41240.06   |
| 139.05 | 44120.06    |      | 183.00 | 38710.05       |      | 227.00 | 948 0.01   |
| 140.05 | 21110.03    |      | 184.00 | 12170.02       |      | 228.00 | 11270.02   |
| 141.05 | 52684 0.71  |      | 185.05 | 16282 0.22     |      | 229.00 | 24730.03   |
| 142.05 | 32458 0.44  |      | 186.05 | 35390.05       |      | 230.05 | 11670.02   |
| 143.05 | 65399 0.89  |      | 187.05 | 60280 0.82     |      | 231.00 | 45530.06   |
| 144.05 | 26600 0.36  |      | 188.05 | 47455 0.64     |      | 232.05 | 23010.03   |
| 145.05 | 135211 1.83 |      | 189.05 | 85991 1.17     |      | 233.00 | 42810.06   |
| 146.05 | 34667 0.47  |      | 190.05 | 15502 0.21     |      | 234.00 | 40070.05   |
| 147.05 | 142974 1.94 |      | 191.00 | 11015 0.15     |      | 235.05 | 13015 0.18 |
| 148.05 | 22857 0.31  |      | 192.00 | 53080.07       |      | 236.05 | 30270.04   |
| 149.05 | 33134 0.45  |      | 193.00 | 53860.07       |      | 237.05 | 48680.07   |
| 150.05 | 40700.06    |      | 194.00 | 34280.05       |      | 238.05 | 889 0.01   |
| 151.05 | 30780.04    |      | 194.95 | 48170.07       |      | 239.05 | 24920.03   |
| 152.05 | 11177 0.15  |      | 196.00 | 964 0.01       |      | 239.95 | 676 0.01   |
| 153.05 | 17161 0.23  |      | 197.00 | 54280.07       |      | 240.95 | 867 0.01   |
| 154.00 | 10311 0.14  |      | 198.00 | 13290.02       |      | 242.05 | 457 0.01   |
| 155.05 | 26523 0.36  |      | 199.00 | 32250.04       |      | 243.05 | 15630.02   |
| 156.05 | 24986 0.34  |      | 200.05 | 18920.03       |      | 244.00 | 980 0.01   |
| 157.05 | 27508 0.37  |      | 201.05 | 42890.06       |      | 245.00 | 11610.02   |
| 158.05 | 11483 0.16  |      | 202.15 | 18283 0.25     |      | 246.00 | 663 0.01   |
| 159.05 | 47630 0.65  |      | 203.05 | 922112 12.50   |      | 247.05 | 998 0.01   |
| 160.05 | 28475 0.39  |      | 204.05 | 153855 2.08    |      | 248.05 | 10130.01   |
| 161.05 | 228527 3.10 |      | 205.00 | 25302 0.34     |      | 249.00 | 47450.06   |
| 162.05 | 42925 0.58  |      | 206.05 | 54820.07       |      | 250.05 | 21030.03   |
| 163.05 | 28856 0.39  |      | 206.95 | 21916 0.30     |      | 251.00 | 39030.05   |
| 164.05 | 44930.06    |      | 208.00 | 56740.08       |      | 252.05 | 14170.02   |
| 165.05 | 15258 0.21  |      | 208.95 | 14804 0.20     |      | 253.05 | 20404 0.28 |
| 166.00 | 64650.09    |      | 210.00 | 34940.05       |      | 254.00 | 38550.05   |
| 167.05 | 56160.08    |      | 210.95 | 31710.04       |      | 254.95 | 672 0.01   |
| 168.05 | 18740.03    |      | 212.05 | 894 0.01       |      | 255.90 | 98 0.00    |
| 169.05 | 52740.07    |      | 213.00 | 46500.06       |      | 257.05 | 426 0.01   |
| 170.05 | 24020 0.33  |      | 213.95 | 852 0.01       |      | 258.10 | 823 0.01   |
| 171.05 | 17574 0.24  |      | 215.00 | 64540.09       |      | 258.95 | 446 0.01   |
| 172.05 | 63500.09    |      | 216.00 | 36100.05       |      | 259.95 | 584 0.01   |
| 173.05 | 47940 0.65  |      | 217.05 | 22865 0.31     |      | 261.10 | 455 0.01   |
| 174.05 | 15807 0.21  |      | 218.15 | 71128 0.96     |      | 262.05 | 379 0.01   |
| 175.05 | 72316 0.98  |      | 219.10 | 7379633 100.00 |      | 263.05 | 13990.02   |
| 176.05 | 13521 0.18  |      | 220.10 | 1300937 17.63  |      | 264.05 | 669 0.01   |
| 177.00 | 47610.06    |      | 221.05 | 129937 1.76    |      | 265.00 | 73160.10   |
| 178.00 | 12202 0.17  |      | 222.05 | 10466 0.14     |      | 266.05 | 47800.06   |



|        |          |      |        |          |      |               |                |              |
|--------|----------|------|--------|----------|------|---------------|----------------|--------------|
| 267.05 | 10349    | 0.14 | 289.00 | 370      | 0.01 | 311.10        | 10316          | 0.14         |
| 268.00 | 41400.06 |      | 290.10 | 110      | 0.00 | 312.05        | 832            | 0.01         |
| 269.00 | 18410.02 |      | 291.10 | 21320.03 |      | 313.10        | 158            | 0.00         |
| 270.00 | 254      | 0.00 | 292.15 | 719      | 0.01 | 314.10        | 65             | 0.00         |
| 271.00 | 134      | 0.00 | 293.10 | 14258    | 0.19 | 315.10        | 34             | 0.00         |
| 272.00 | 138      | 0.00 | 294.10 | 34620.05 |      | 316.10        | 60             | 0.00         |
| 273.00 | 135      | 0.00 | 295.10 | 20860.03 |      | 317.10        | 42             | 0.00         |
| 274.00 | 79       | 0.00 | 296.15 | 515      | 0.01 | 318.10        | 27             | 0.00         |
| 275.00 | 398      | 0.01 | 297.20 | 103      | 0.00 | 319.10        | 31             | 0.00         |
| 276.00 | 218      | 0.00 | 298.20 | 110      | 0.00 | 320.10        | 86             | 0.00         |
| 277.05 | 542      | 0.01 | 299.20 | 84       | 0.00 | 321.10        | 266            | 0.00         |
| 278.10 | 186      | 0.00 | 300.20 | 31       | 0.00 | 322.10        | 21500.03       |              |
| 279.05 | 14150.02 |      | 301.20 | 21       | 0.00 | 323.15        | 89640.12       |              |
| 280.05 | 862      | 0.01 | 302.20 | 49       | 0.00 | <b>324.10</b> | <b>1120295</b> | <b>15.18</b> |
| 281.05 | 30839    | 0.42 | 303.20 | 121      | 0.00 | <b>325.10</b> | <b>276106</b>  | <b>3.74</b>  |
| 282.05 | 68180.09 |      | 304.20 | 130      | 0.00 | 326.10        | 37550          | 0.51         |
| 283.00 | 18660.03 |      | 305.20 | 97       | 0.00 | 327.00        | 42120.06       |              |
| 284.00 | 303      | 0.00 | 306.10 | 239      | 0.00 | 327.95        | 675            | 0.01         |
| 285.00 | 130      | 0.00 | 307.10 | 29770.04 |      | 329.00        | 140            | 0.00         |
| 286.00 | 54       | 0.00 | 308.15 | 83870.11 |      | 330.00        | 81             | 0.00         |
| 287.00 | 90       | 0.00 | 309.10 | 343746   | 4.66 |               |                |              |
| 288.00 | 66       | 0.00 | 310.10 | 81161    | 1.10 |               |                |              |

### 2.3.3 GC-MS Analysis of Raw Reaction Mixture by Using 1,1-diphenylethen as

#### Radical Inhibitor

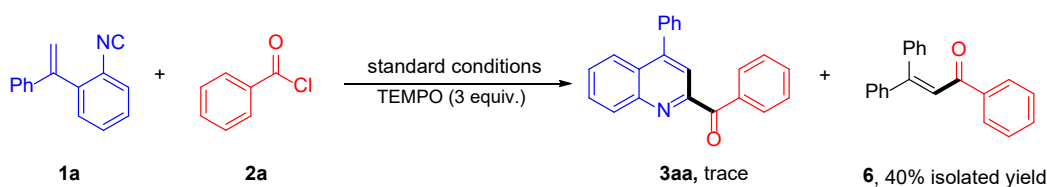

To a Schlenk tube were added 1-isocyano-2-(1-phenylvinyl)benzene **1a** (0.2 mmol), benzoyl chloride **2a** (6 mmol, 3 equiv), Ir(ppy)<sub>3</sub> (1 mol%), 2,6-lutidine (0.8 mmol, 4 equiv.), 1,1-diphenylethene (3 equiv), CH<sub>3</sub>CN (2 mL) at room temperature and 6 W blue LED irradiation for 12 h. The GC-MS analysis of raw reaction mixture showed that only trace amounts of the target product **3aa** was detected. The acyl radical trapping product **6**, which generated from 1,1-diphenylethene capturing the acyl radical, could be detected by GC-MS analysis.

#### The GC-MS analysis results of raw reaction mixture

#### The GC spectra of raw reaction mixture

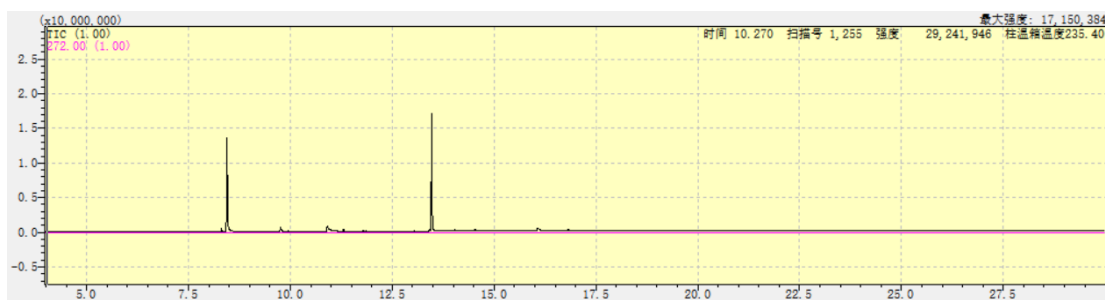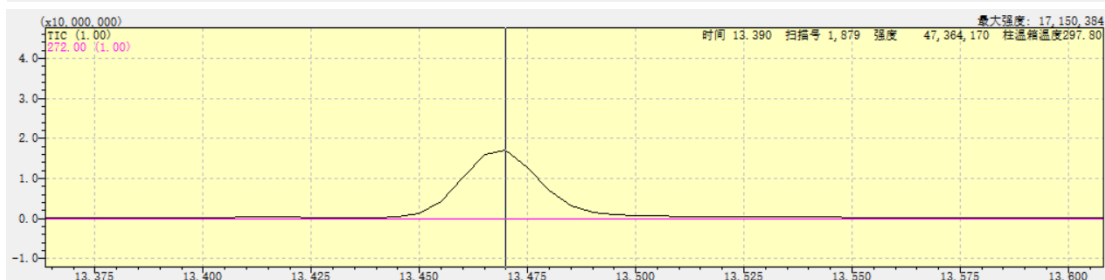

The MS spectra of the peak at 13.47 min

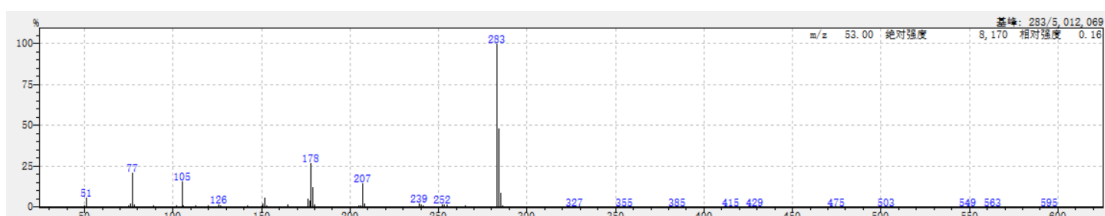

| [MS Spectrum]       | 60.95                          | 10360.02 | 83.05    | 10980.02 |          |          |          |       |
|---------------------|--------------------------------|----------|----------|----------|----------|----------|----------|-------|
| # of Peaks          | 548                            | 62.00    | 92040.19 | 84.00    | 15020.03 |          |          |       |
| Raw Spectrum        | 13.465 (scan : 1894)           | 63.00    | 37654    | 0.77     | 84.95    | 14730.03 |          |       |
| Background          | No                             | 65.00    | 10623    | 0.22     | 87.00    | 17185    | 0.35     |       |
| Background Spectrum |                                | 66.00    | 11260.02 |          | 88.05    | 20781    | 0.43     |       |
| Base Peak           | m/z 283.05 (Inten : 4,881,985) | 67.00    | 506      | 0.01     | 89.00    | 39569    | 0.81     |       |
| Event#              | 1                              | 69.00    | 926      | 0.02     | 91.00    | 17742    | 0.36     |       |
| m/z                 | Absolute Intensity             | 69.95    | 380      | 0.01     | 92.00    | 20020.04 |          |       |
|                     | Relative Intensity             | 71.05    | 660      | 0.01     | 93.55    | 46480.10 |          |       |
| 50.00               | 41241                          | 0.84     | 72.05    | 310      | 0.01     | 94.50    | 81480.17 |       |
| 51.00               | 261439                         | 5.36     | 73.05    | 64160.13 |          | 96.00    | 28700.06 |       |
| 52.00               | 27970                          | 0.57     | 74.00    | 23222    | 0.48     | 97.05    | 10420.02 |       |
| 53.00               | 67350.14                       |          | 75.00    | 47231    | 0.97     | 97.95    | 69890.14 |       |
| 54.00               | 362                            | 0.01     | 76.05    | 96551    | 1.98     | 99.00    | 79030.16 |       |
| 55.00               | 19670.04                       |          | 77.00    | 921450   | 18.87    | 100.05   | 10771    | 0.22  |
| 55.95               | 744                            | 0.02     | 78.00    | 70839    | 1.45     | 101.05   | 34539    | 0.71  |
| 57.05               | 926                            | 0.02     | 79.05    | 40070.08 |          | 102.00   | 63919    | 1.31  |
| 58.00               | 217                            | 0.00     | 79.95    | 422      | 0.01     | 103.00   | 28119    | 0.58  |
| 59.00               | 575                            | 0.01     | 81.20    | 21400.04 |          | 104.05   | 82420.17 |       |
| 60.00               | 182                            | 0.00     | 82.15    | 14200.03 |          | 105.00   | 707974   | 14.50 |

|        |          |      |        |          |       |        |          |       |
|--------|----------|------|--------|----------|-------|--------|----------|-------|
| 106.00 | 59428    | 1.22 | 150.00 | 43596    | 0.89  | 193.95 | 813      | 0.02  |
| 107.40 | 14650    | 0.30 | 151.00 | 117575   | 2.41  | 194.90 | 378      | 0.01  |
| 108.35 | 33430.07 |      | 152.00 | 262798   | 5.38  | 195.90 | 158      | 0.00  |
| 109.00 | 11530.02 |      | 153.00 | 49727    | 1.02  | 196.90 | 170      | 0.00  |
| 110.00 | 22220.05 |      | 154.00 | 82380.17 |       | 198.05 | 882      | 0.02  |
| 111.05 | 38960.08 |      | 155.05 | 956      | 0.02  | 199.00 | 12230.03 |       |
| 112.05 | 85290.17 |      | 156.00 | 98       | 0.00  | 199.95 | 50690.10 |       |
| 113.05 | 50630    | 1.04 | 157.00 | 121      | 0.00  | 200.95 | 44790.09 |       |
| 114.00 | 29902    | 0.61 | 158.00 | 156      | 0.00  | 202.00 | 13033    | 0.27  |
| 115.00 | 25804    | 0.53 | 159.00 | 217      | 0.00  | 203.00 | 41450.08 |       |
| 116.00 | 37620.08 |      | 160.00 | 36       | 0.00  | 204.05 | 24280.05 |       |
| 116.60 | 11720.02 |      | 161.00 | 13020.03 |       | 205.00 | 67231    | 1.38  |
| 117.65 | 17590.04 |      | 162.00 | 40420.08 |       | 206.05 | 50354    | 1.03  |
| 118.65 | 12493    | 0.26 | 163.00 | 18378    | 0.38  | 207.00 | 710806   | 14.56 |
| 119.65 | 57577    | 1.18 | 164.00 | 12934    | 0.26  | 208.00 | 114274   | 2.34  |
| 120.55 | 17877    | 0.37 | 165.00 | 72337    | 1.48  | 208.95 | 12585    | 0.26  |
| 122.05 | 25688    | 0.53 | 166.00 | 11102    | 0.23  | 210.00 | 11350.02 |       |
| 122.95 | 32670.07 |      | 167.00 | 35100.07 |       | 210.95 | 22550.05 |       |
| 124.05 | 27910.06 |      | 168.00 | 759      | 0.02  | 211.95 | 957      | 0.02  |
| 125.05 | 23620    | 0.48 | 169.00 | 150      | 0.00  | 213.00 | 79350.16 |       |
| 126.05 | 85601    | 1.75 | 170.00 | 50       | 0.00  | 214.05 | 29590.06 |       |
| 127.00 | 43162    | 0.88 | 171.00 | 79       | 0.00  | 215.00 | 25495    | 0.52  |
| 128.00 | 25183    | 0.52 | 172.00 | 108      | 0.00  | 216.00 | 61500.13 |       |
| 129.00 | 14359    | 0.29 | 173.05 | 621      | 0.01  | 216.95 | 10930.02 |       |
| 130.45 | 29570.06 |      | 174.00 | 69640.14 |       | 218.00 | 986      | 0.02  |
| 131.45 | 23772    | 0.49 | 175.05 | 17182    | 0.35  | 218.90 | 524      | 0.01  |
| 132.35 | 30975    | 0.63 | 176.00 | 240271   | 4.92  | 219.90 | 169      | 0.00  |
| 133.35 | 11923    | 0.24 | 177.05 | 202355   | 4.14  | 220.90 | 13930.03 |       |
| 134.15 | 15453    | 0.32 | 178.00 | 1230174  | 25.20 | 221.95 | 856      | 0.02  |
| 135.15 | 39870.08 |      | 179.00 | 563822   | 11.55 | 223.00 | 10260.02 |       |
| 136.05 | 381      | 0.01 | 180.00 | 73338    | 1.50  | 224.00 | 57610.12 |       |
| 137.00 | 52920.11 |      | 181.00 | 16476    | 0.34  | 224.95 | 47600.10 |       |
| 138.00 | 43620.09 |      | 182.00 | 18700.04 |       | 225.95 | 26437    | 0.54  |
| 139.05 | 29705    | 0.61 | 183.00 | 265      | 0.01  | 227.00 | 13438    | 0.28  |
| 140.05 | 98080.20 |      | 184.00 | 68       | 0.00  | 228.00 | 22042    | 0.45  |
| 141.05 | 33317    | 0.68 | 184.95 | 428      | 0.01  | 229.00 | 11092    | 0.23  |
| 142.05 | 43672    | 0.89 | 186.05 | 792      | 0.02  | 230.00 | 18780.04 |       |
| 142.95 | 43790.09 |      | 187.00 | 53540.11 |       | 231.00 | 930      | 0.02  |
| 144.00 | 242      | 0.00 | 188.00 | 45750.09 |       | 232.00 | 241      | 0.00  |
| 144.95 | 405      | 0.01 | 189.00 | 24620    | 0.50  | 233.00 | 170      | 0.00  |
| 146.00 | 242      | 0.00 | 190.05 | 82970.17 |       | 233.90 | 174      | 0.00  |
| 147.00 | 13900.03 |      | 191.00 | 34575    | 0.71  | 234.90 | 898      | 0.02  |
| 148.05 | 462      | 0.01 | 192.00 | 58380.12 |       | 236.00 | 742      | 0.02  |
| 149.05 | 55850.11 |      | 192.95 | 41150.08 |       | 236.95 | 48130.10 |       |

|        |          |      |        |          |      |               |                |               |
|--------|----------|------|--------|----------|------|---------------|----------------|---------------|
| 238.05 | 37850.08 |      | 258.90 | 254      | 0.01 | 280.05        | 15200.03       |               |
| 239.00 | 107818   | 2.21 | 260.00 | 281      | 0.01 | 281.00        | 25447          | 0.52          |
| 240.00 | 70938    | 1.45 | 261.00 | 14060.03 |      | 282.05        | 31295          | 0.64          |
| 241.00 | 64513    | 1.32 | 262.05 | 877      | 0.02 | <b>283.05</b> | <b>4881985</b> | <b>100.00</b> |
| 242.00 | 13153    | 0.27 | 263.00 | 12967    | 0.27 | <b>284.05</b> | <b>2393937</b> | <b>49.04</b>  |
| 243.00 | 23610.05 |      | 264.00 | 51780.11 |      | <b>285.00</b> | <b>432991</b>  | <b>8.87</b>   |
| 243.95 | 848      | 0.02 | 265.00 | 48985    | 1.00 | 286.00        | 48350          | 0.99          |
| 244.90 | 284      | 0.01 | 266.00 | 15177    | 0.31 | 287.05        | 33390.07       |               |
| 245.90 | 132      | 0.00 | 267.05 | 13878    | 0.28 | 288.00        | 412            | 0.01          |
| 247.00 | 199      | 0.00 | 268.00 | 11591    | 0.24 | 289.00        | 138            | 0.00          |
| 248.00 | 17960.04 |      | 269.00 | 42950.09 |      | 290.00        | 73             | 0.00          |
| 248.95 | 25930.05 |      | 270.05 | 925      | 0.02 | 291.00        | 92             | 0.00          |
| 250.00 | 19766    | 0.40 | 271.00 | 162      | 0.00 | 292.00        | 70             | 0.00          |
| 251.05 | 91470.19 |      | 272.00 | 78       | 0.00 | 293.00        | 241            | 0.00          |
| 252.00 | 89367    | 1.83 | 273.00 | 132      | 0.00 | 294.00        | 122            | 0.00          |
| 253.00 | 83564    | 1.71 | 274.00 | 87       | 0.00 | 295.00        | 494            | 0.01          |
| 254.00 | 39302    | 0.81 | 275.00 | 170      | 0.00 | 296.00        | 345            | 0.01          |
| 255.00 | 77166    | 1.58 | 276.00 | 153      | 0.00 | 297.00        | 215            | 0.00          |
| 256.00 | 37142    | 0.76 | 277.00 | 194      | 0.00 | 298.00        | 39             | 0.00          |
| 257.00 | 93960.19 |      | 278.05 | 296      | 0.01 |               |                |               |
| 257.95 | 11490.02 |      | 279.00 | 14330.03 |      |               |                |               |

## 2.4 The Light on/off Experiments

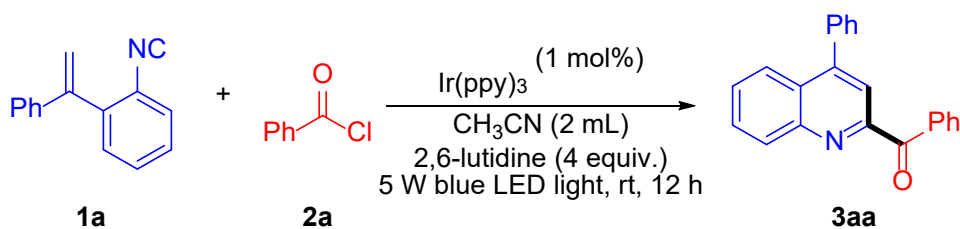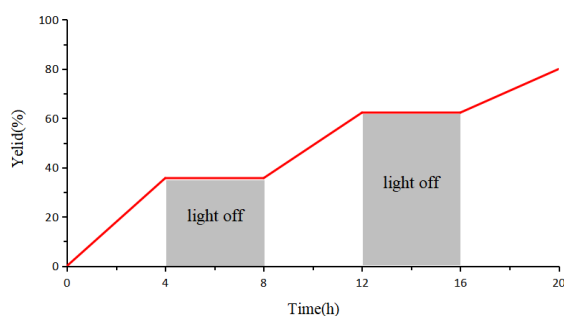

Figure S2 The Light on/off Experiments

| Time/h  | 0 | 4 (blue) | 8 (dark) | 12 (blue) | 16 (dark) | 20 (blue) |
|---------|---|----------|----------|-----------|-----------|-----------|
| Yield/% | 0 | 35.7     | 35.7     | 62.3      | 62.3      | 80.0      |

The above depicted reaction was performed according to the general protocol established. The reaction was irradiated with 5 W blue LEDs for 4 hour and then stirred in the dark for 4 hour. This procedure was repeated for 20 hours, and the yield of the product was determined by  $^1\text{H}$  NMR with dibromomethane as an internal standard at each point the light was turned off or on. The results are shown in the graph above. This result shows that constant light irradiation is needed to progress the reaction.

### 3. References

[1] J. Wang, H. Liu, Y. Liu, W. Hao, Y. Yang, Y. Sun and X. Xu, *Org. Chem. Front.*, 2022, **9**, 6484-6489.

## 4. Spectra

### Phenyl(4-phenylquinolin-2-yl)methanone(3aa)

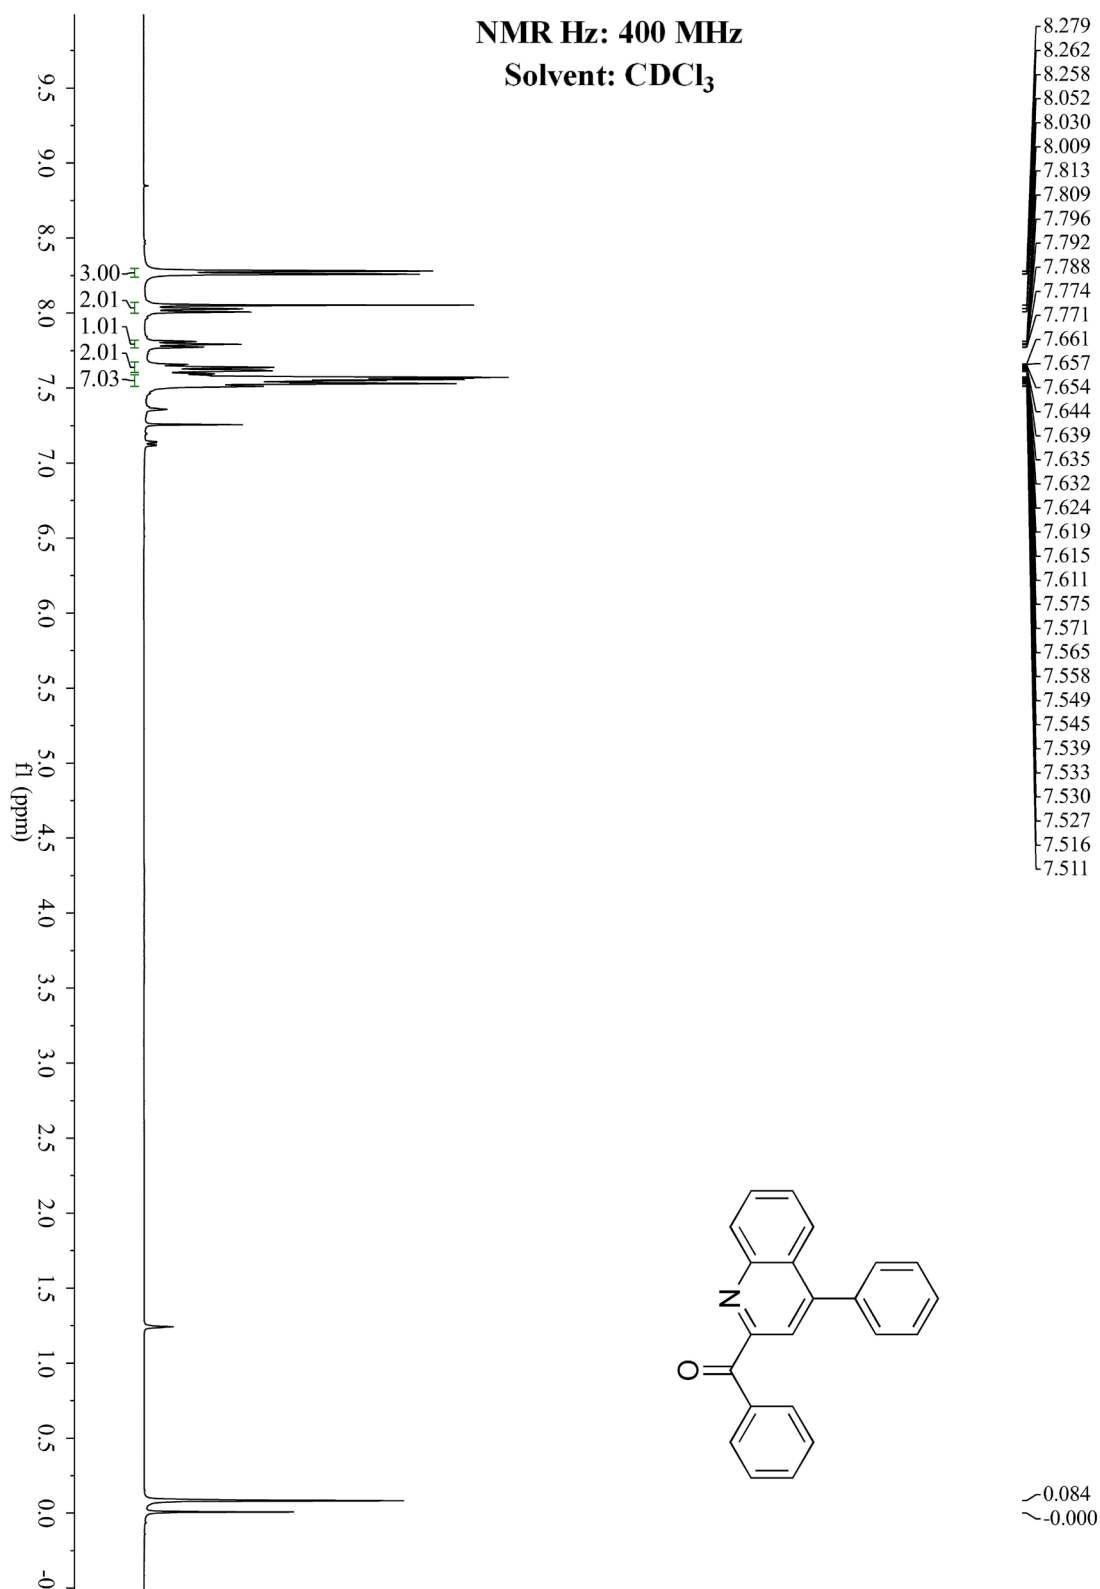

NMR Hz: 100 MHz  
Solvent: CDCl<sub>3</sub>

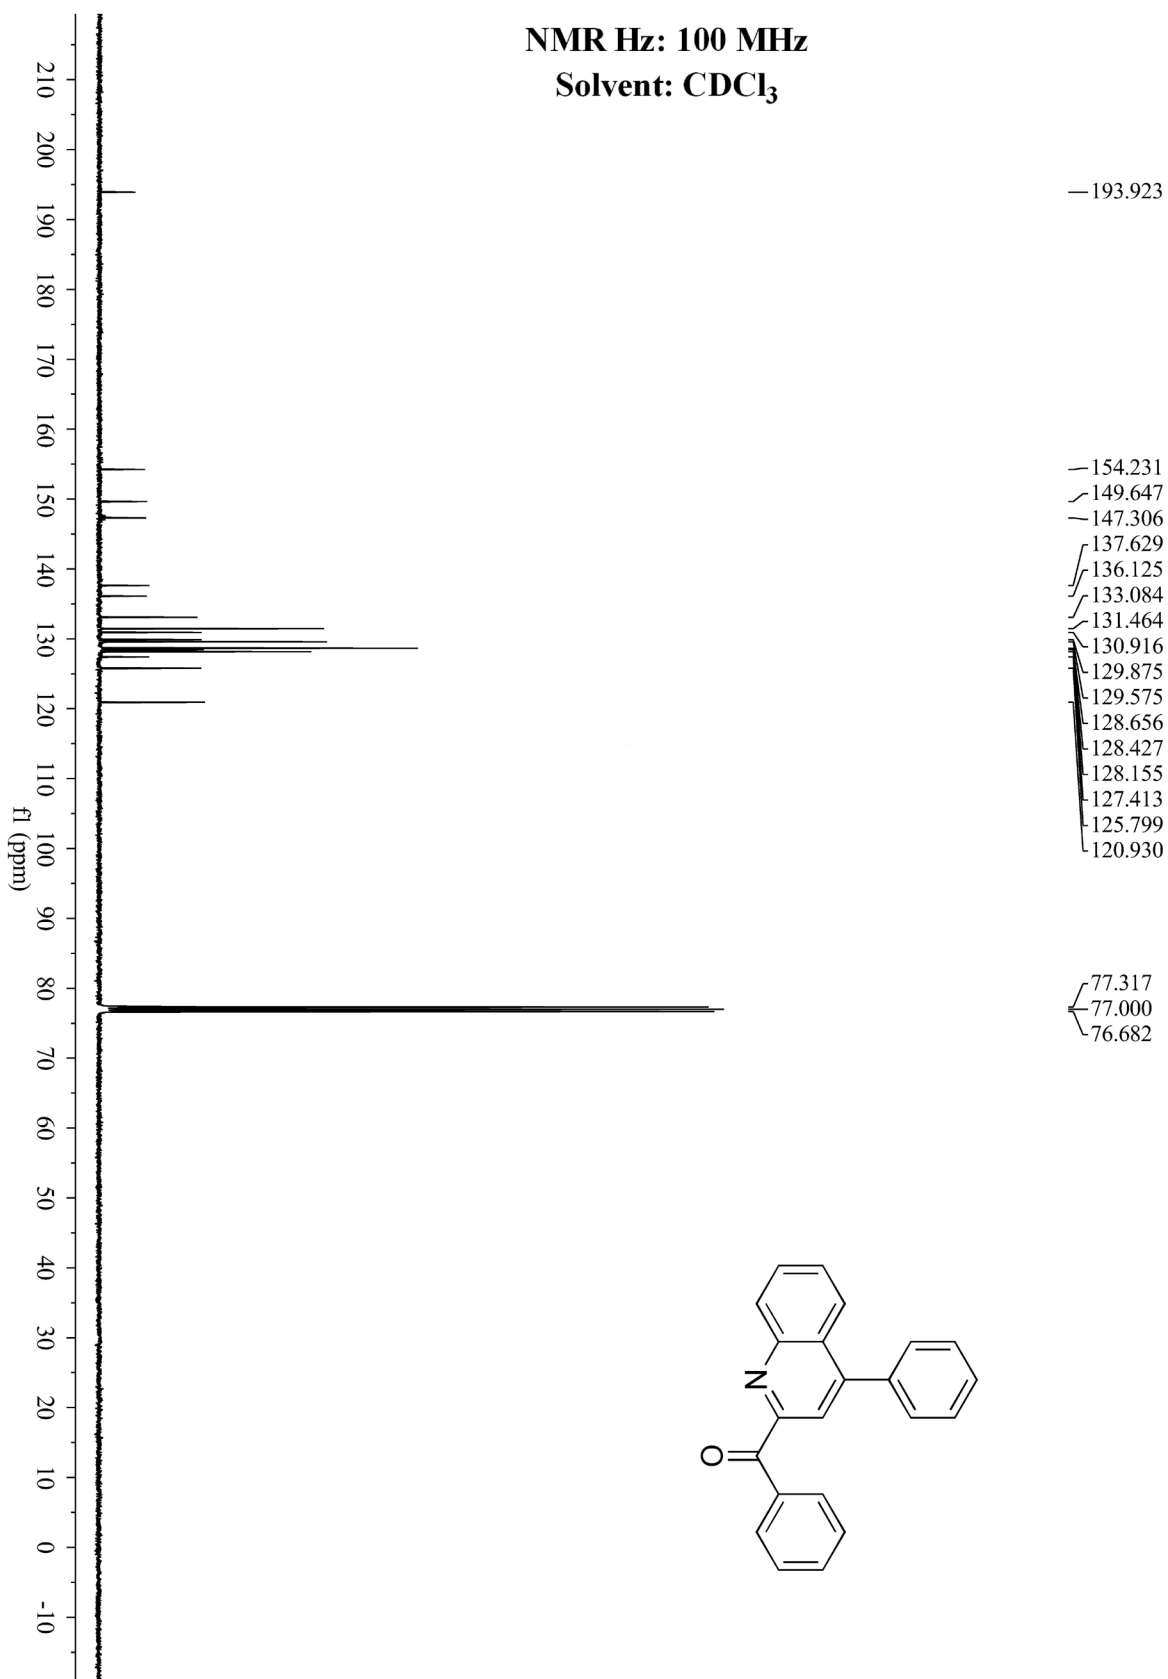

(4-Phenylquinolin-2-yl)(p-tolyl)methanone(3ab)

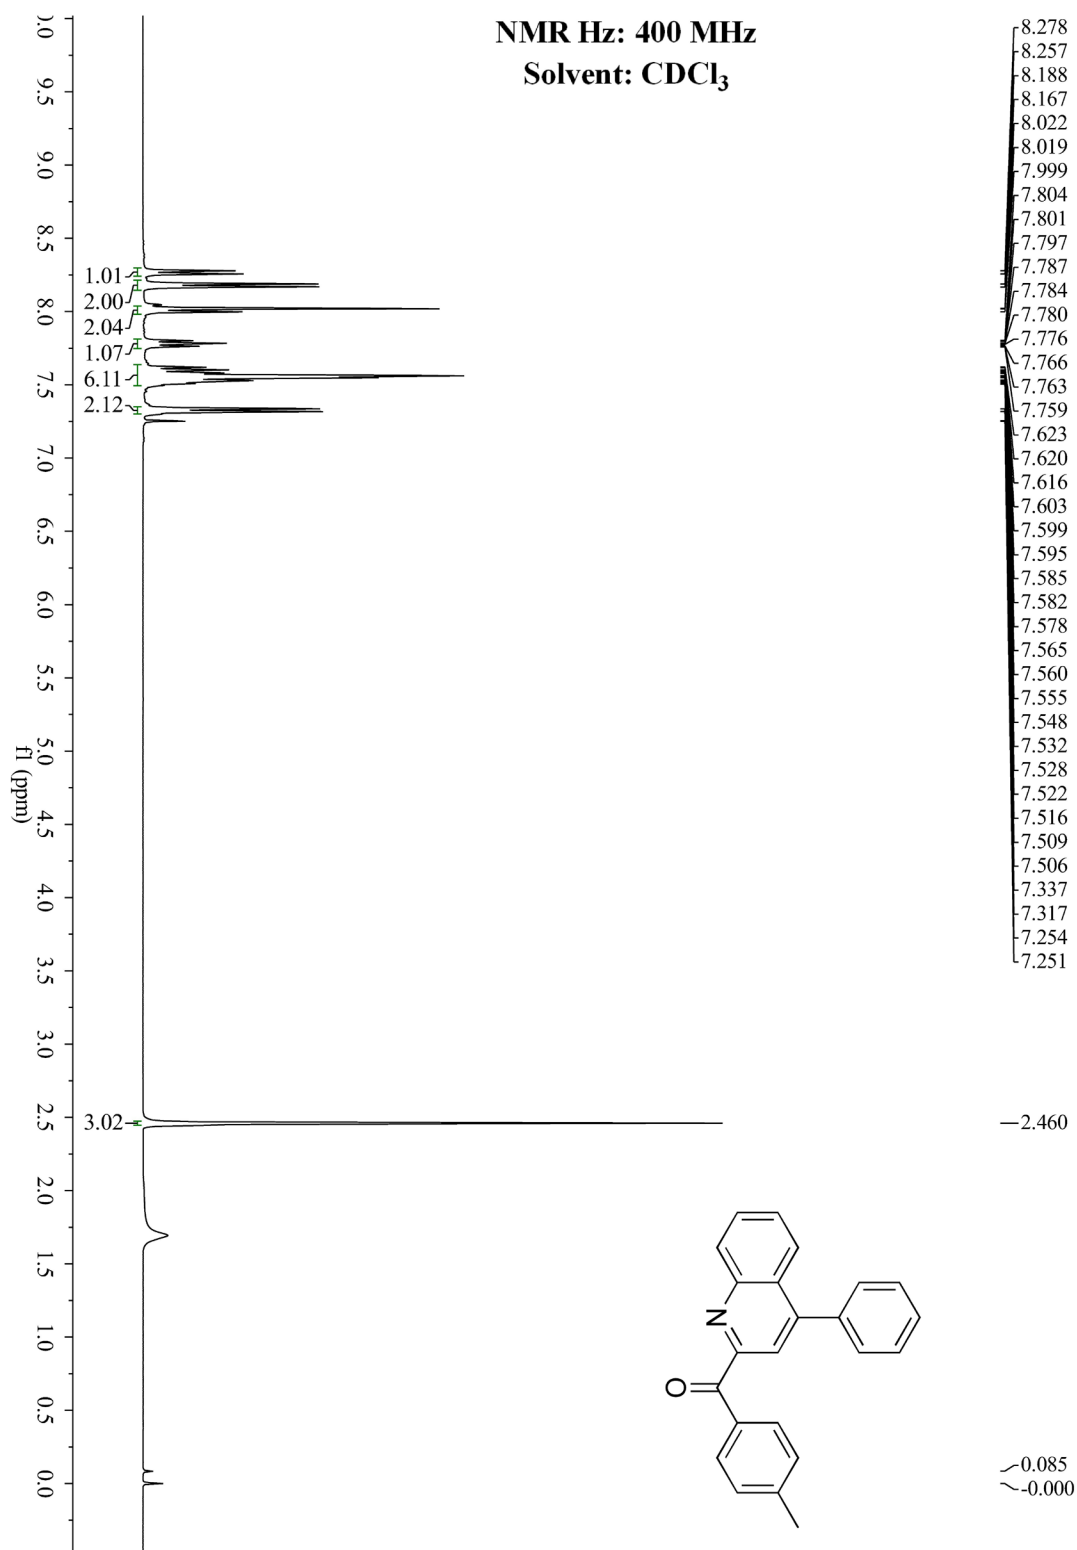



NMR Hz: 100 MHz  
Solvent: CDCl<sub>3</sub>

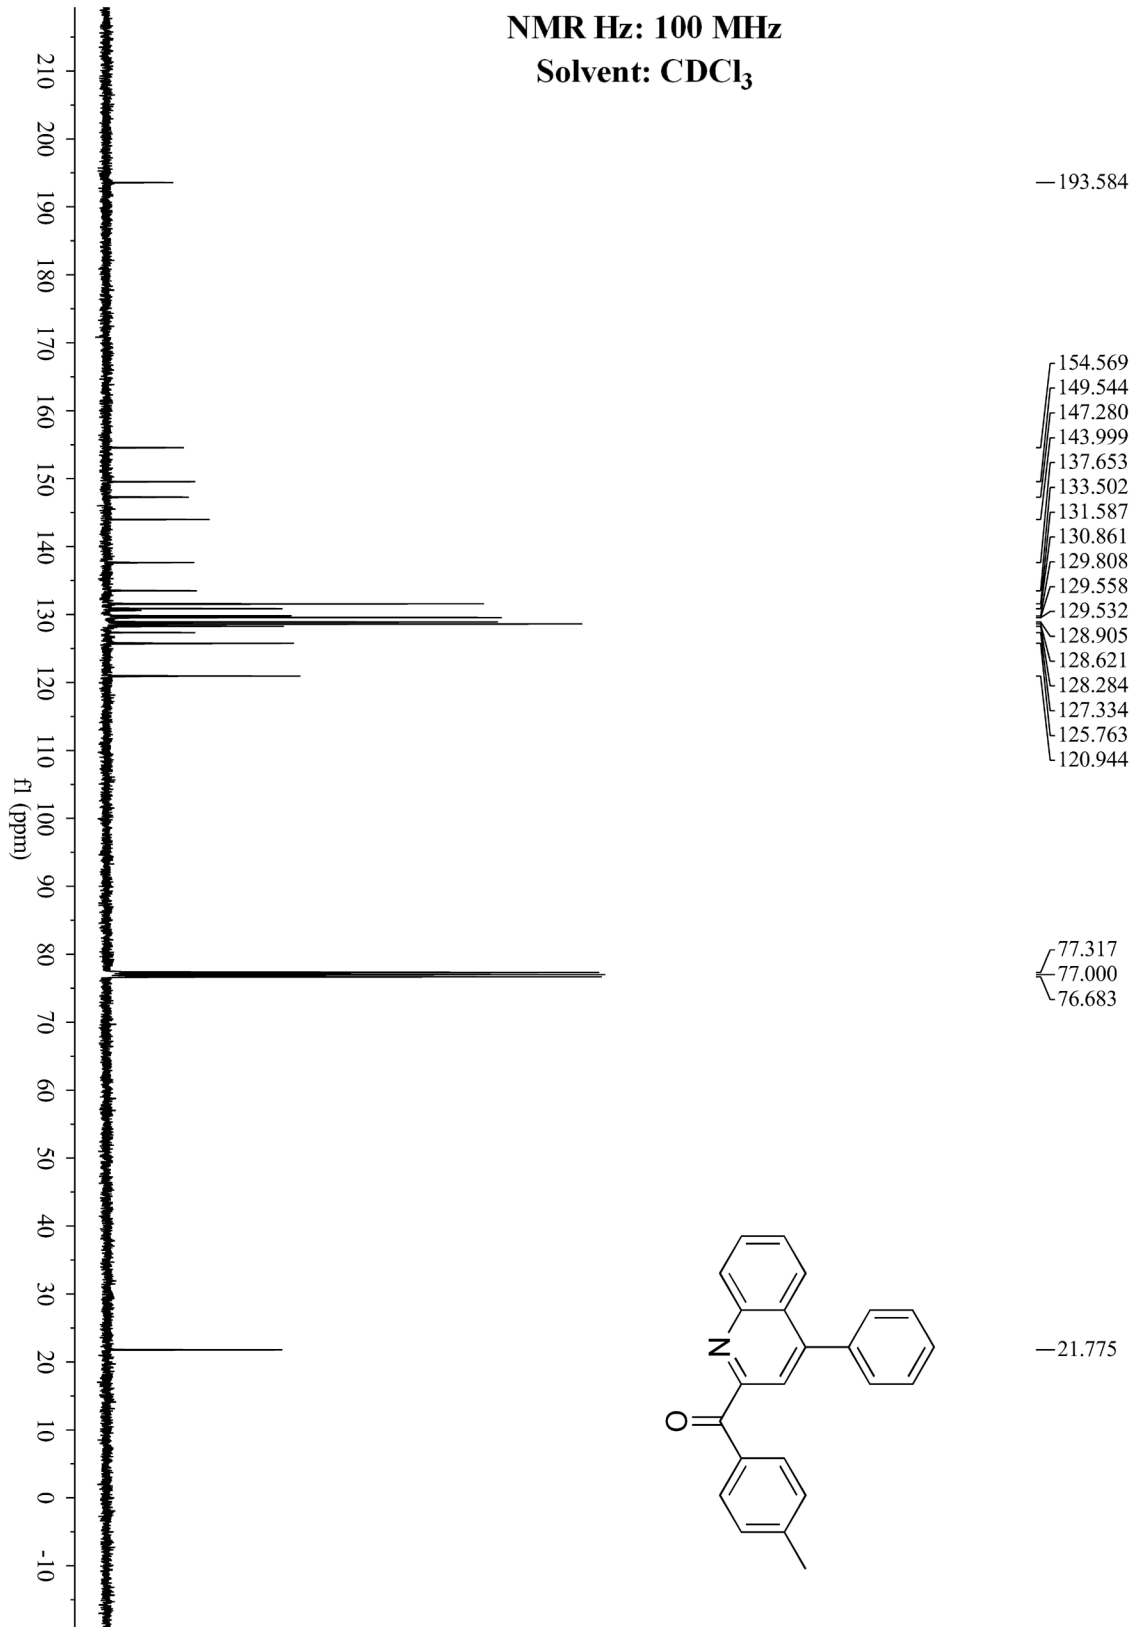

(4-(Tert-butyl)phenyl)(4-phenylquinolin-2-yl)methanone(3ac)

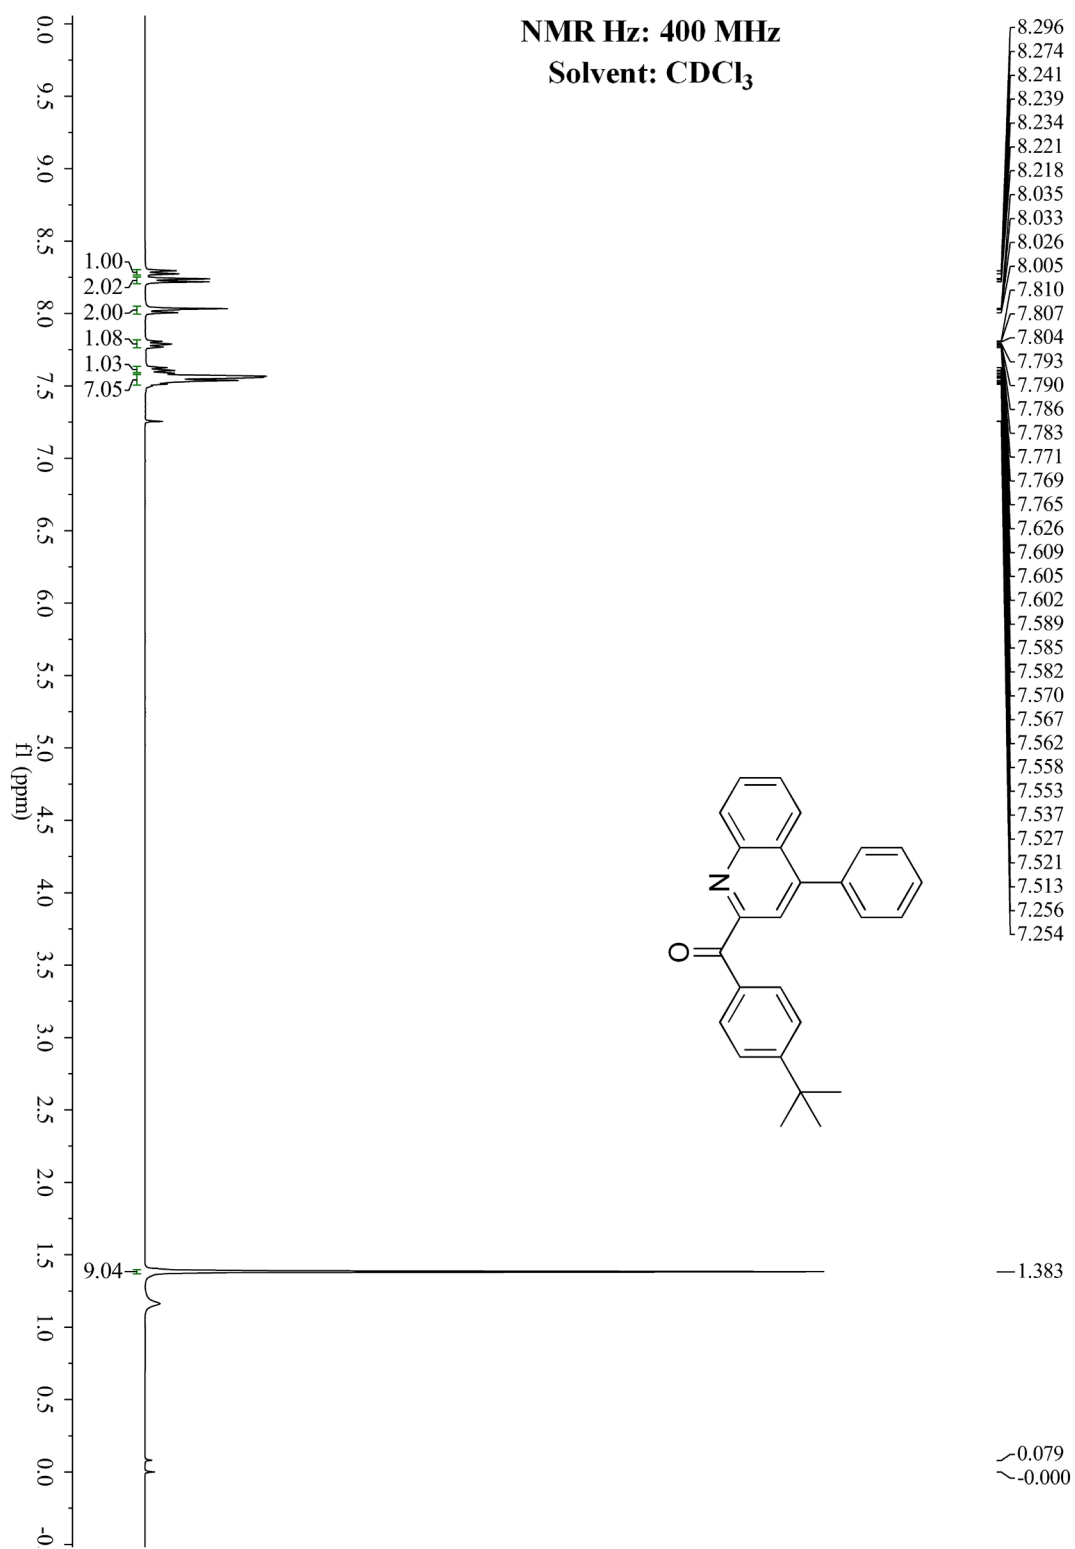

NMR Hz: 100 MHz  
Solvent: CDCl<sub>3</sub>

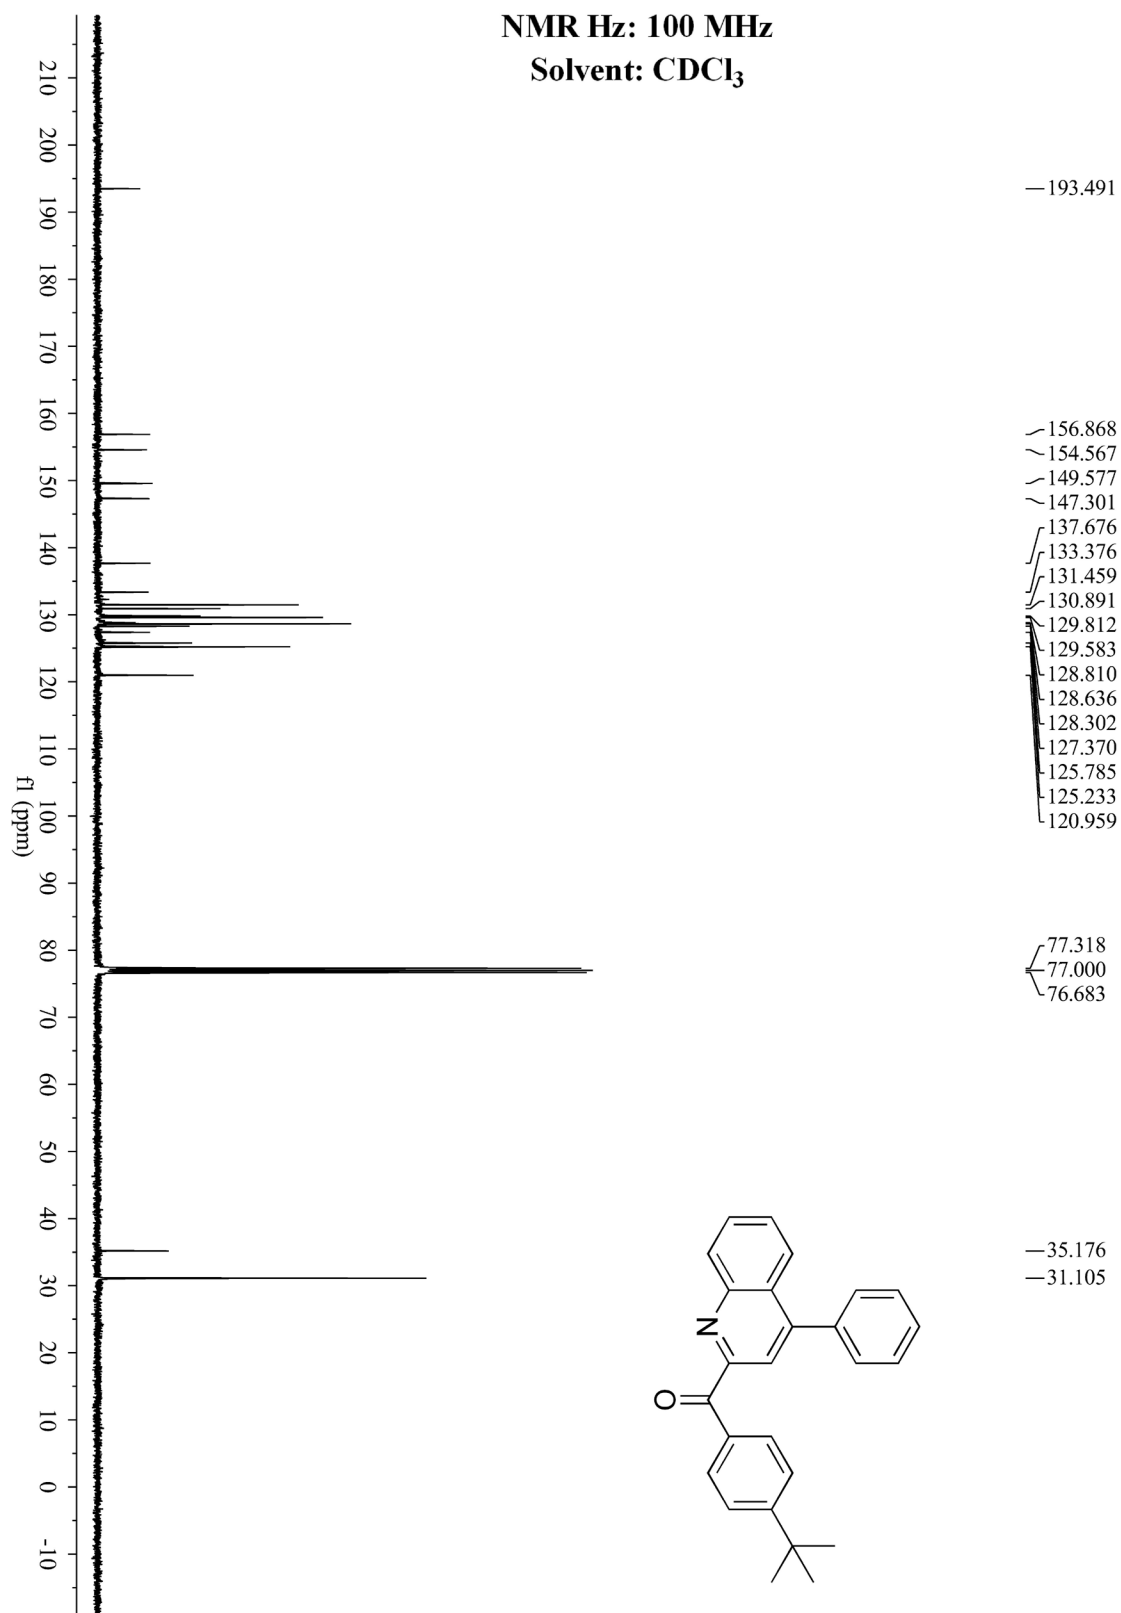

(4-Methoxyphenyl)(4-phenylquinolin-2-yl)methanone(3ad)

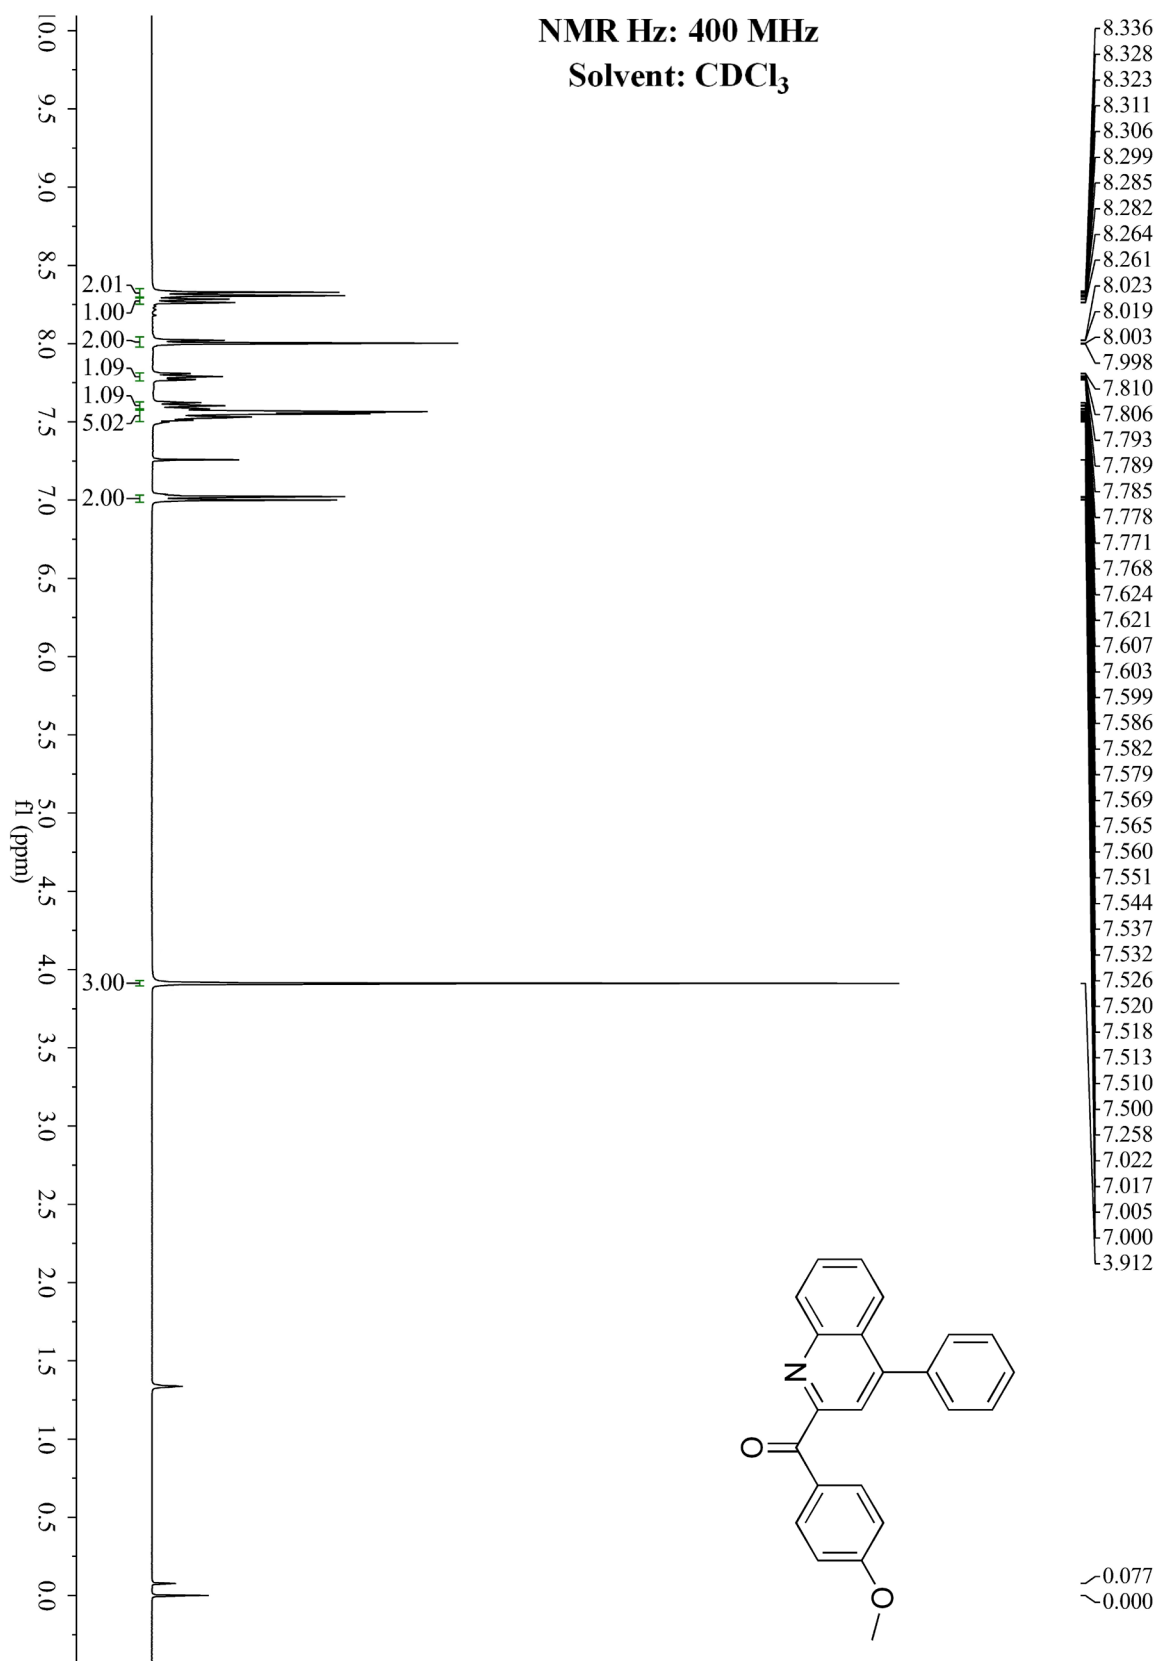

NMR Hz: 100 MHz

Solvent: CDCl<sub>3</sub>

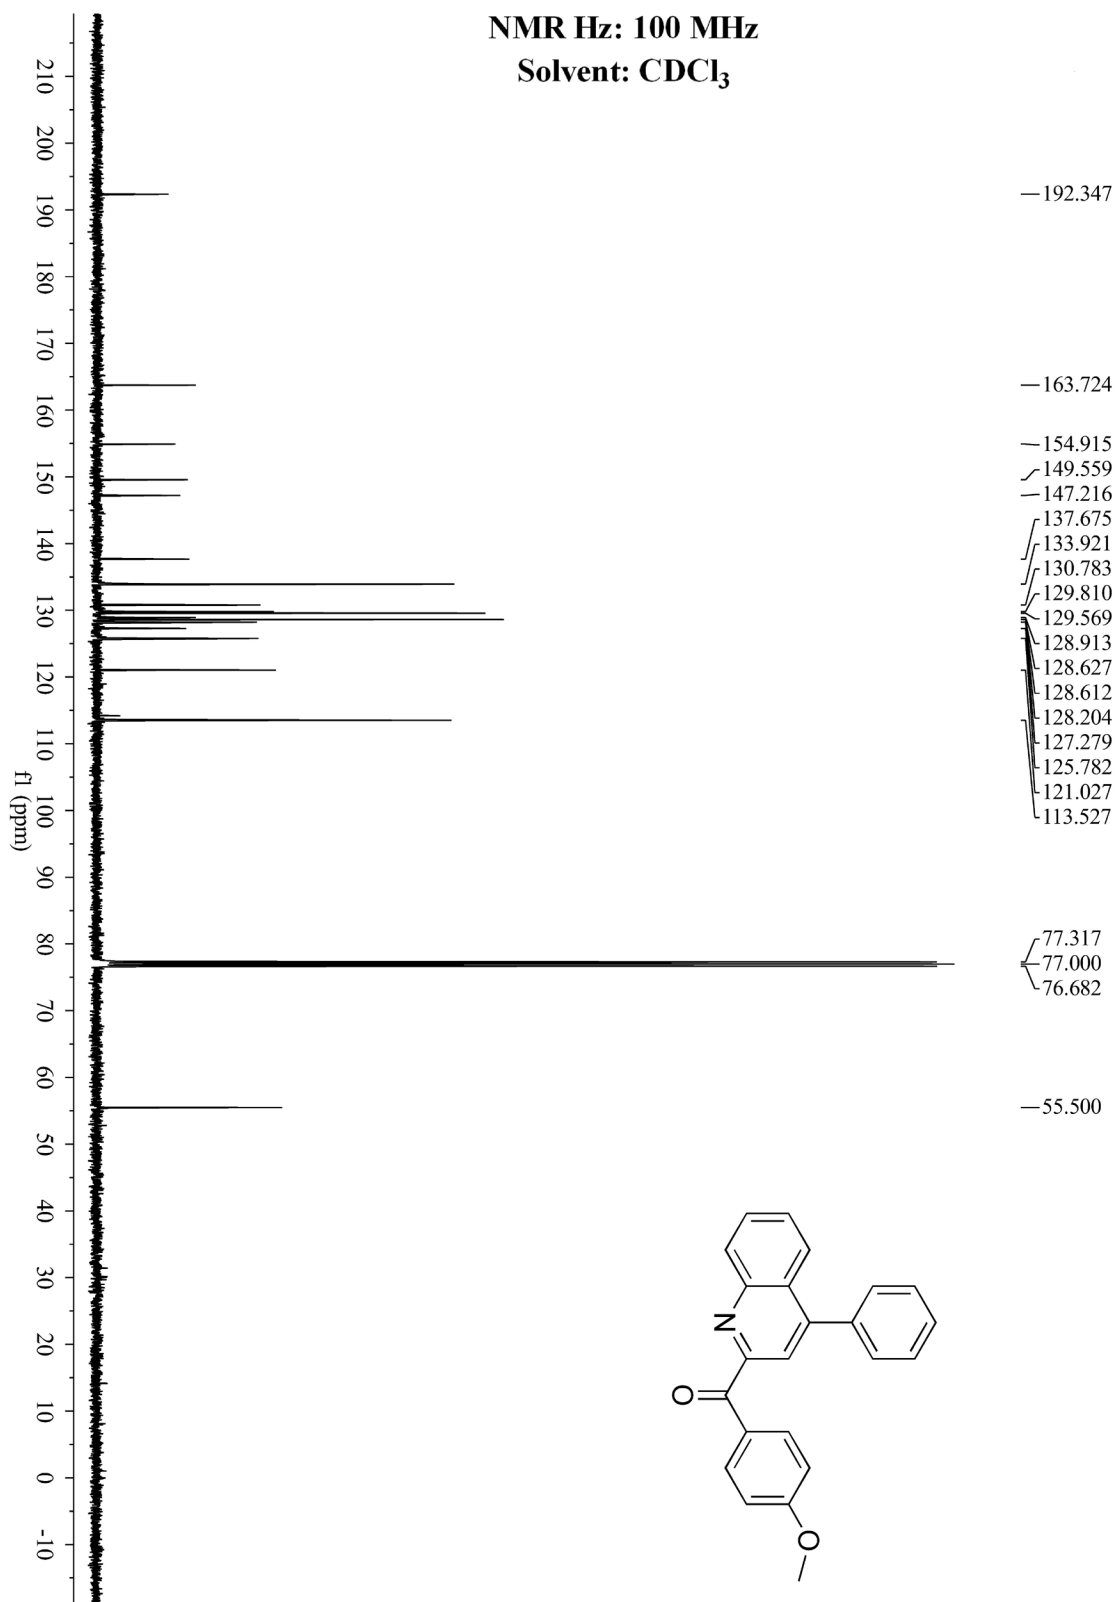

(4-Fluorophenyl)(4-phenylquinolin-2-yl)methanone (3ae)

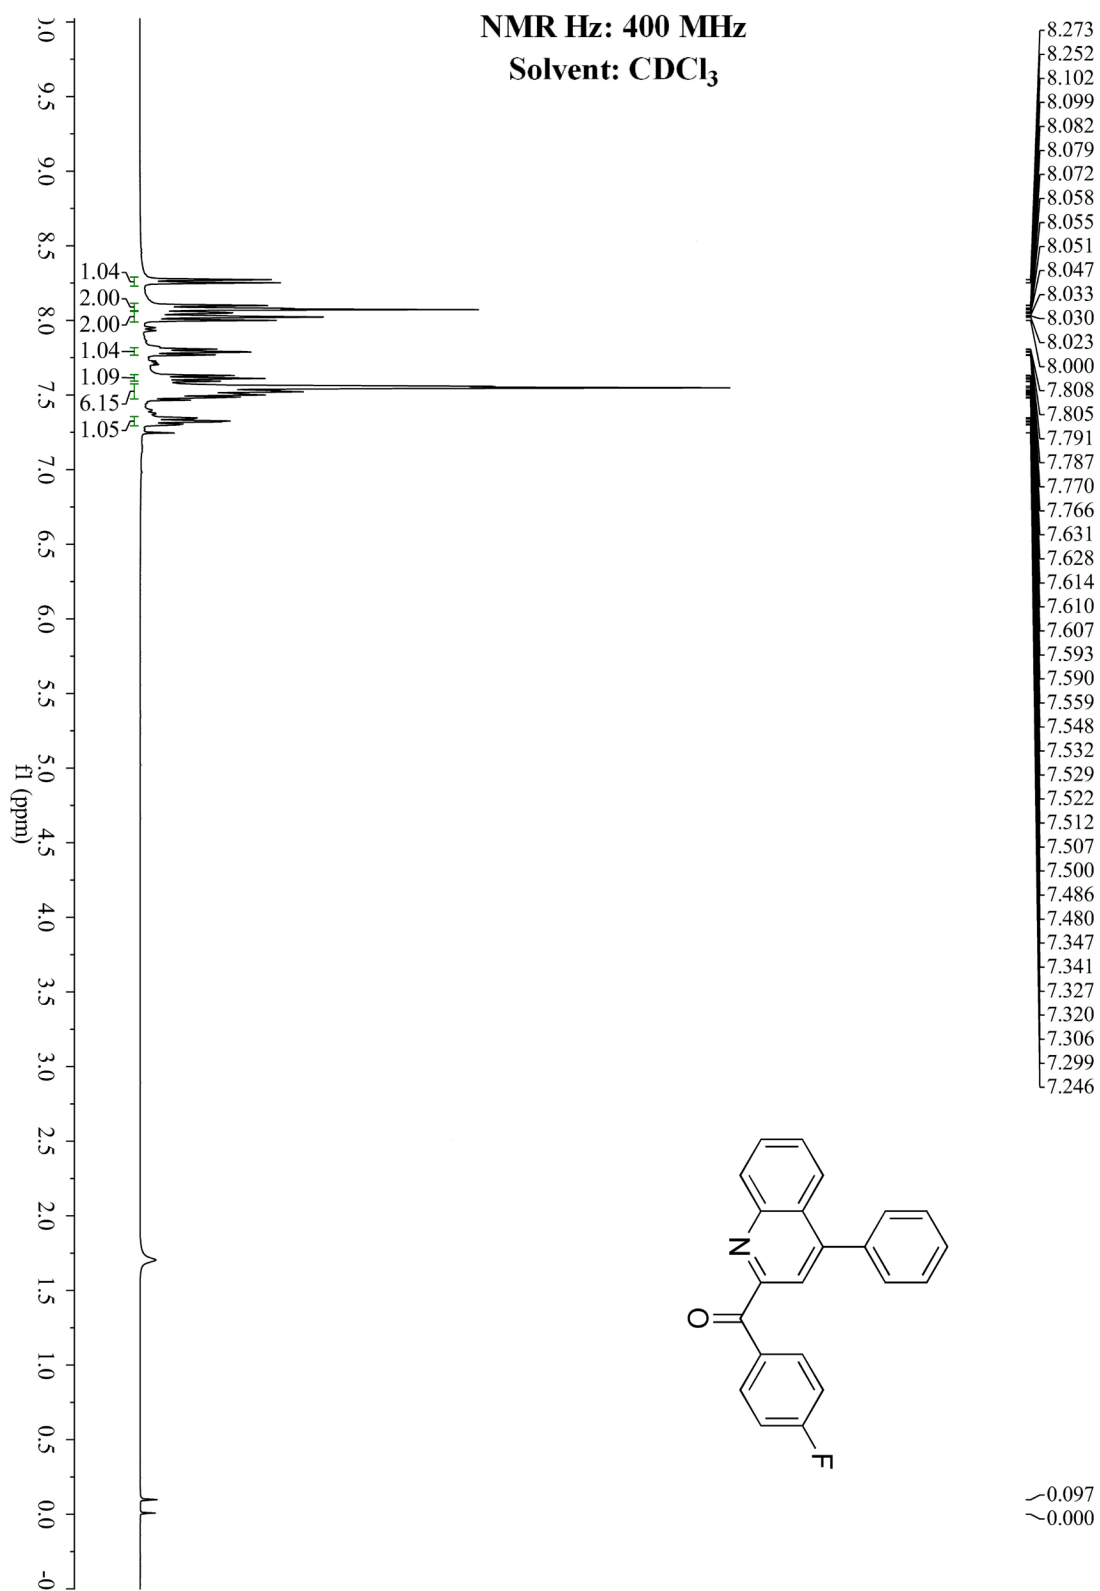

NMR Hz: 100 MHz  
Solvent: CDCl<sub>3</sub>

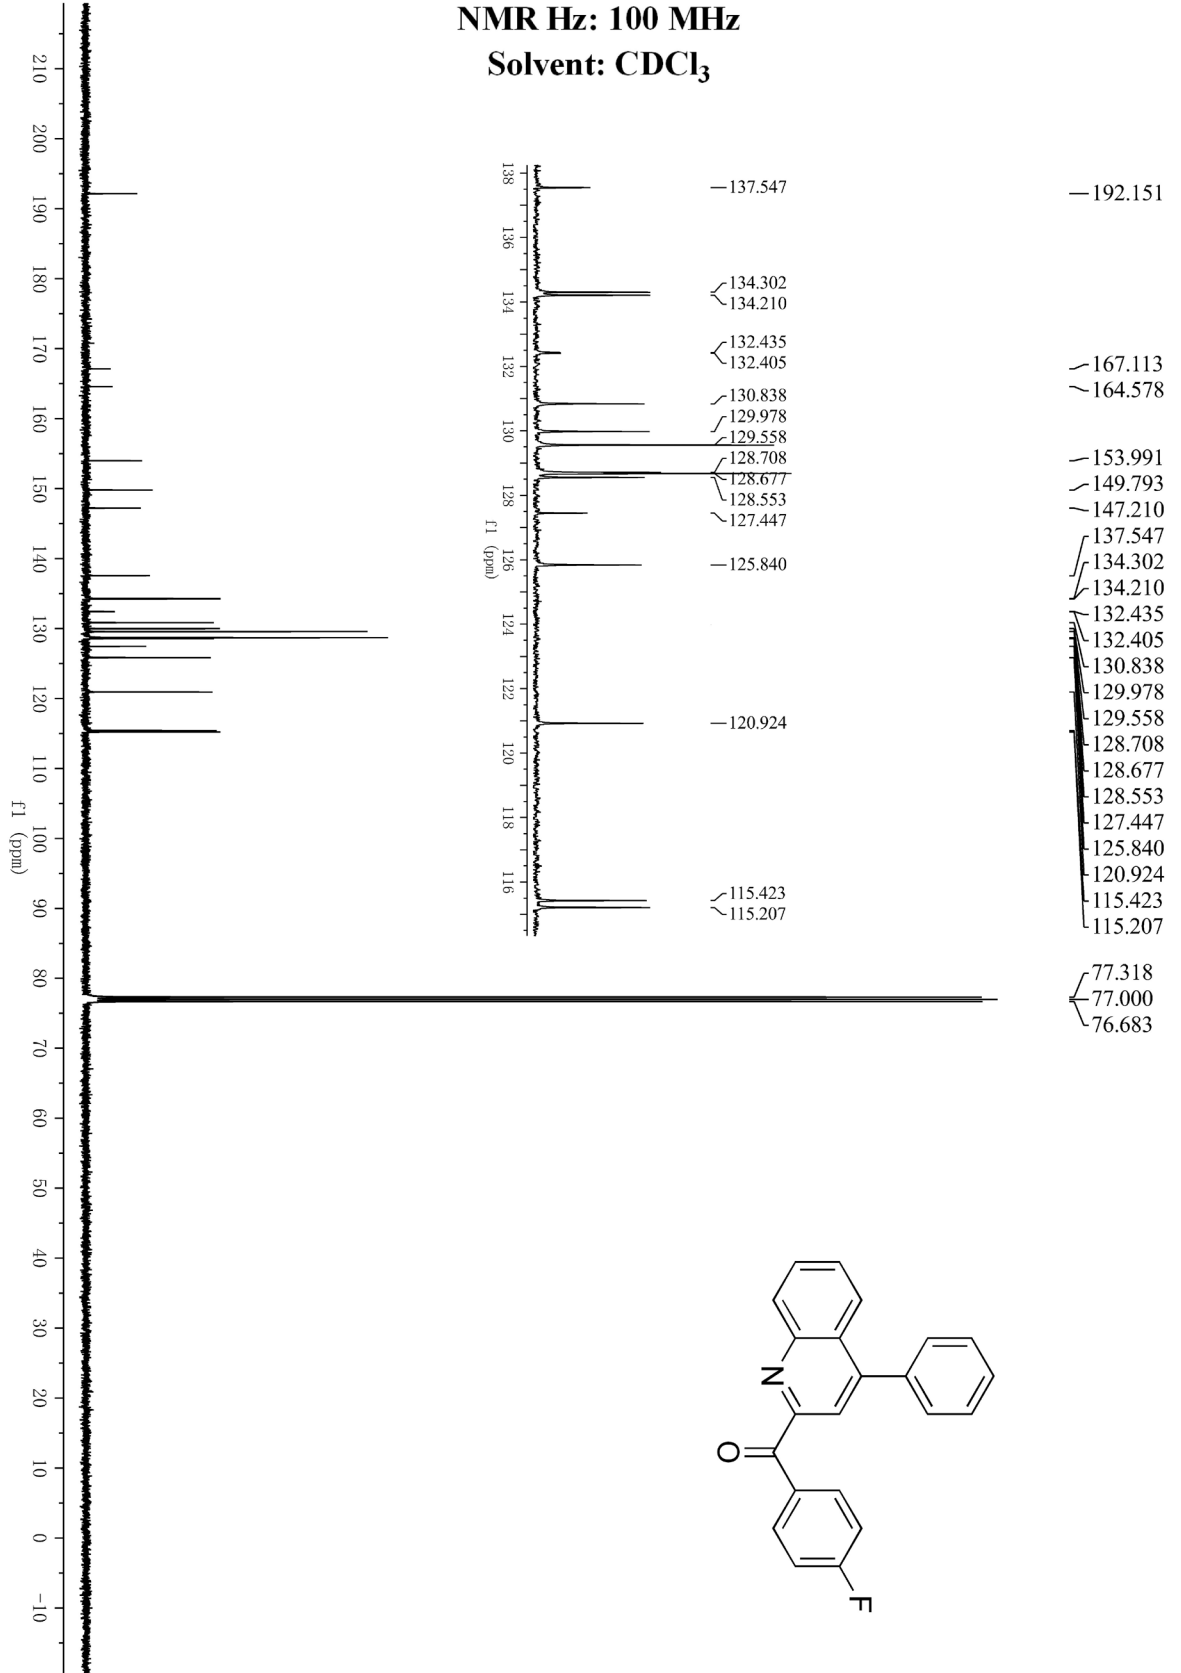

NMR Hz: 282 MHz  
Solvent: CDCl<sub>3</sub>

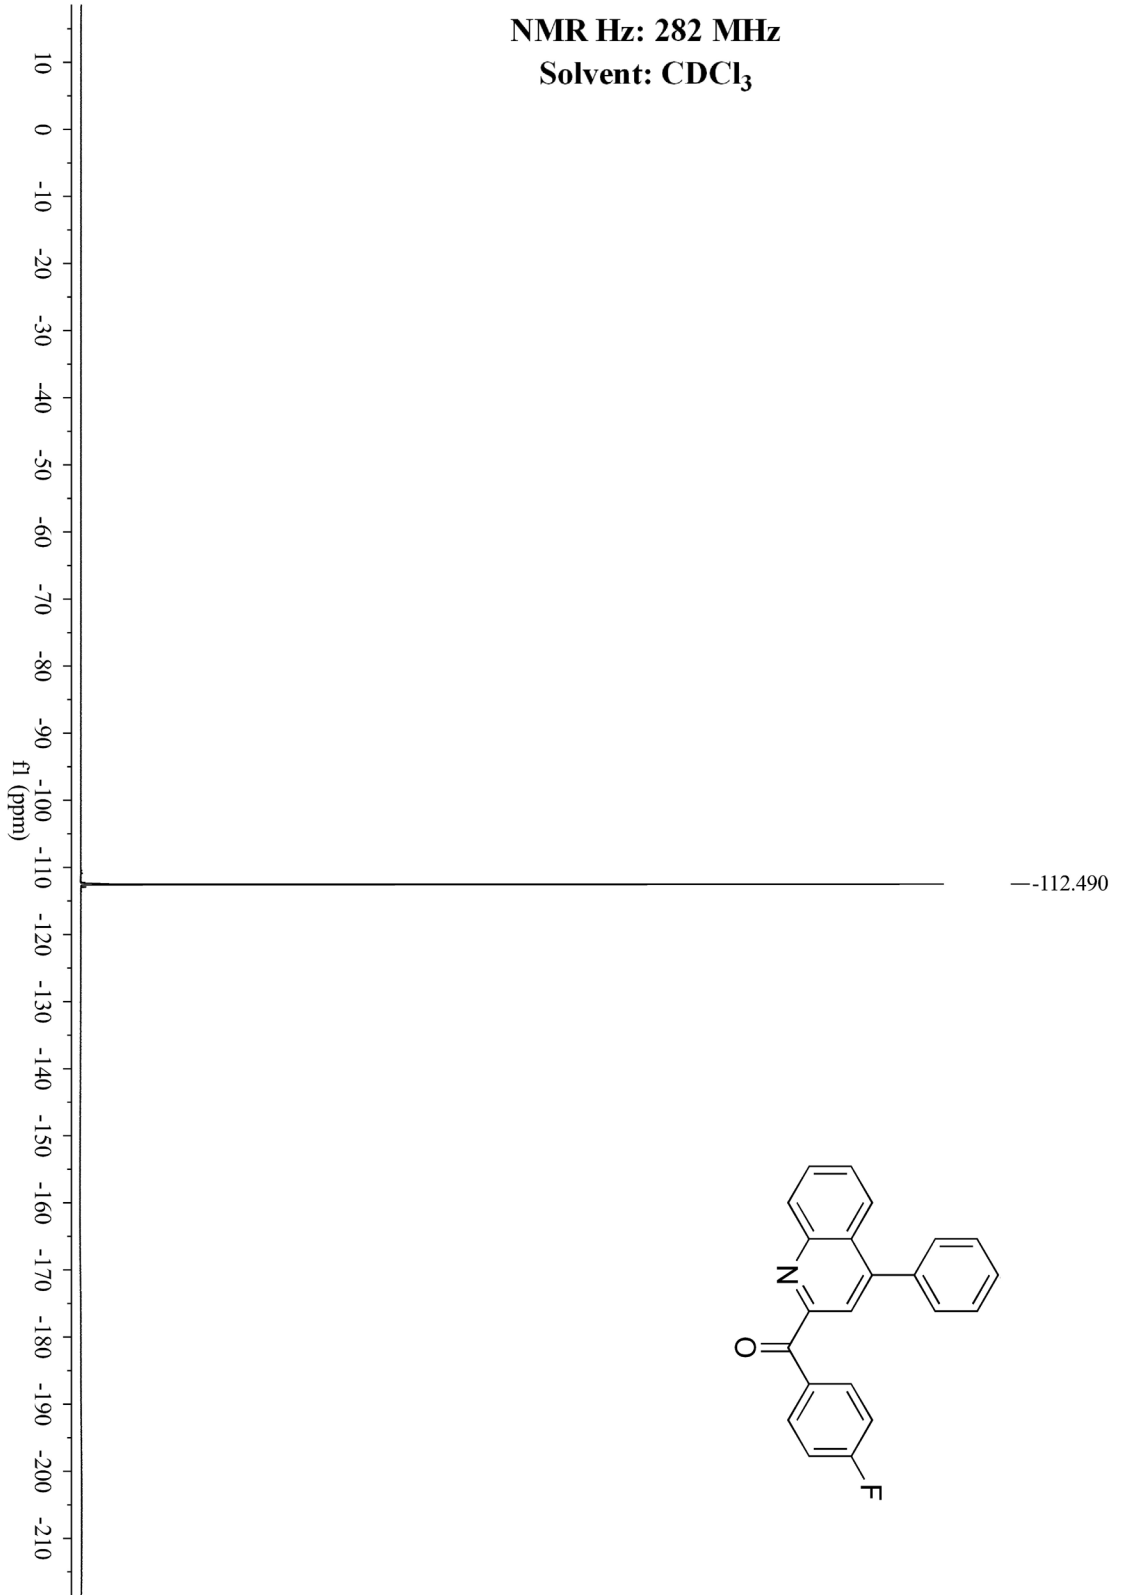



(4-Chlorophenyl)(4-phenylquinolin-2-yl)methanone (3af)

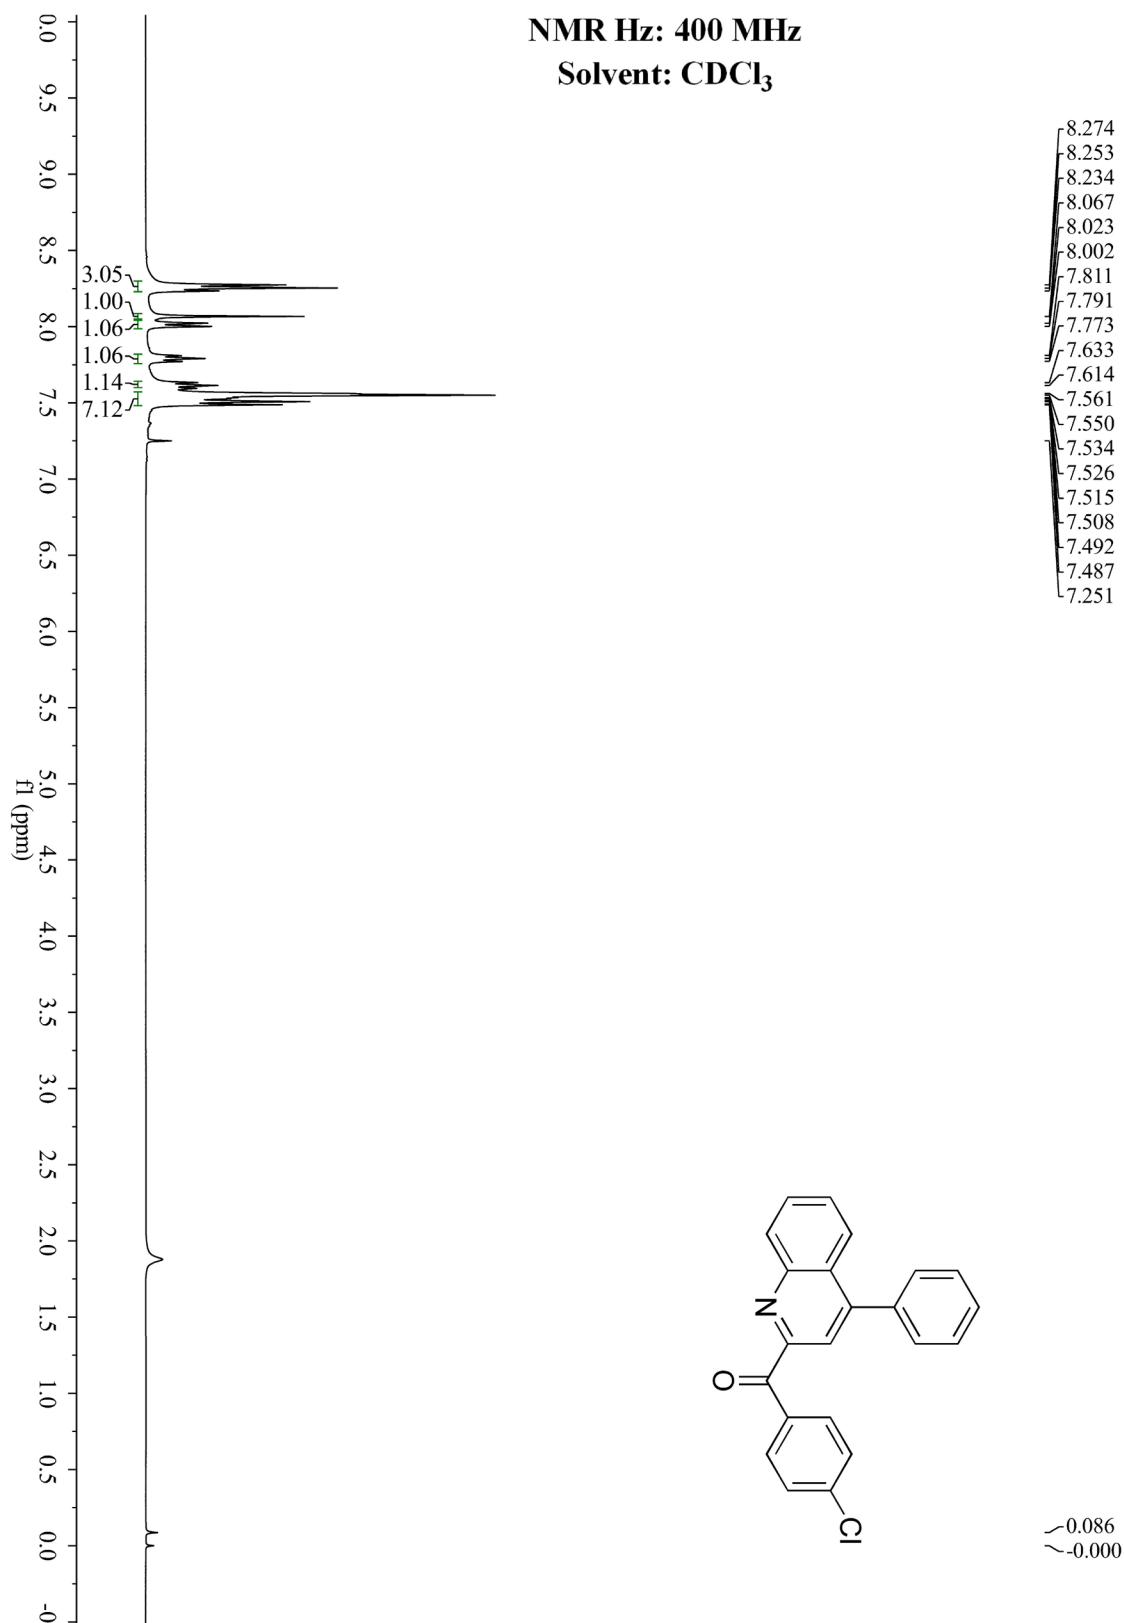

NMR Hz: 100 MHz  
Solvent: CDCl<sub>3</sub>

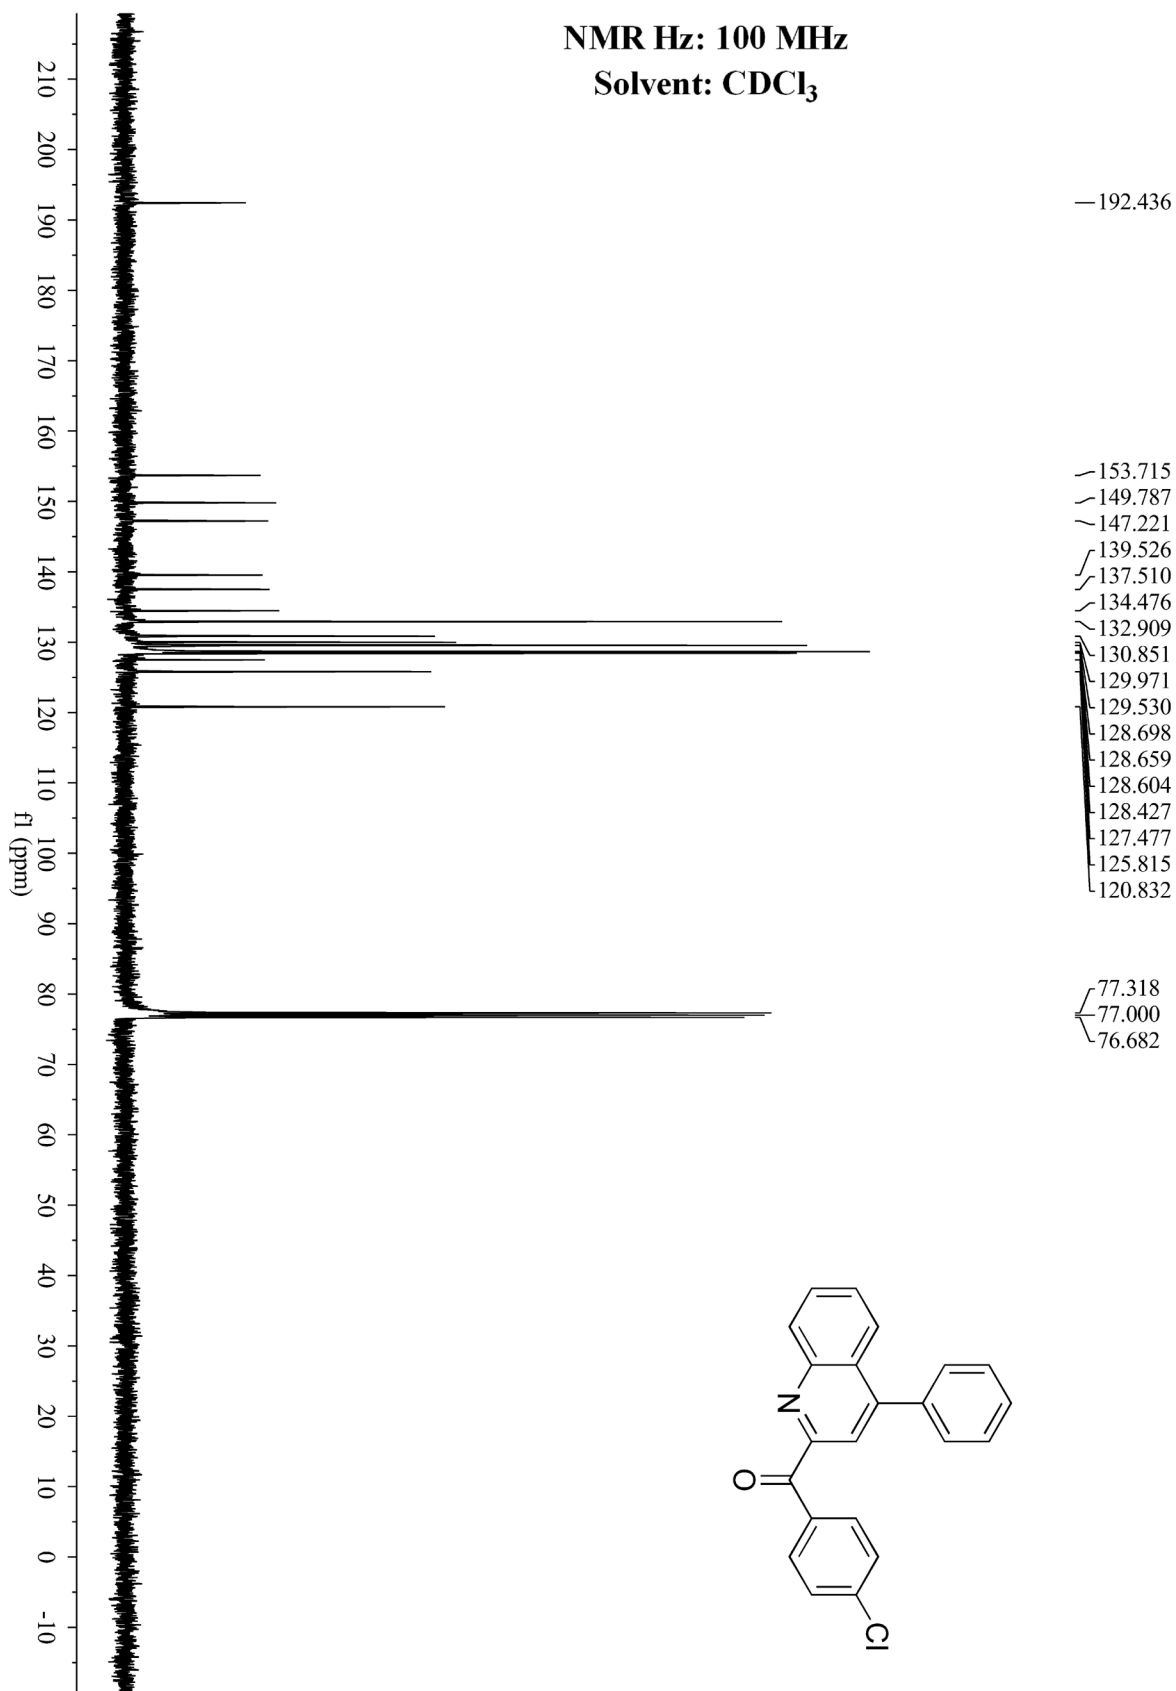

(4-Bromophenyl)(4-phenylquinolin-2-yl)methanone (3ag)

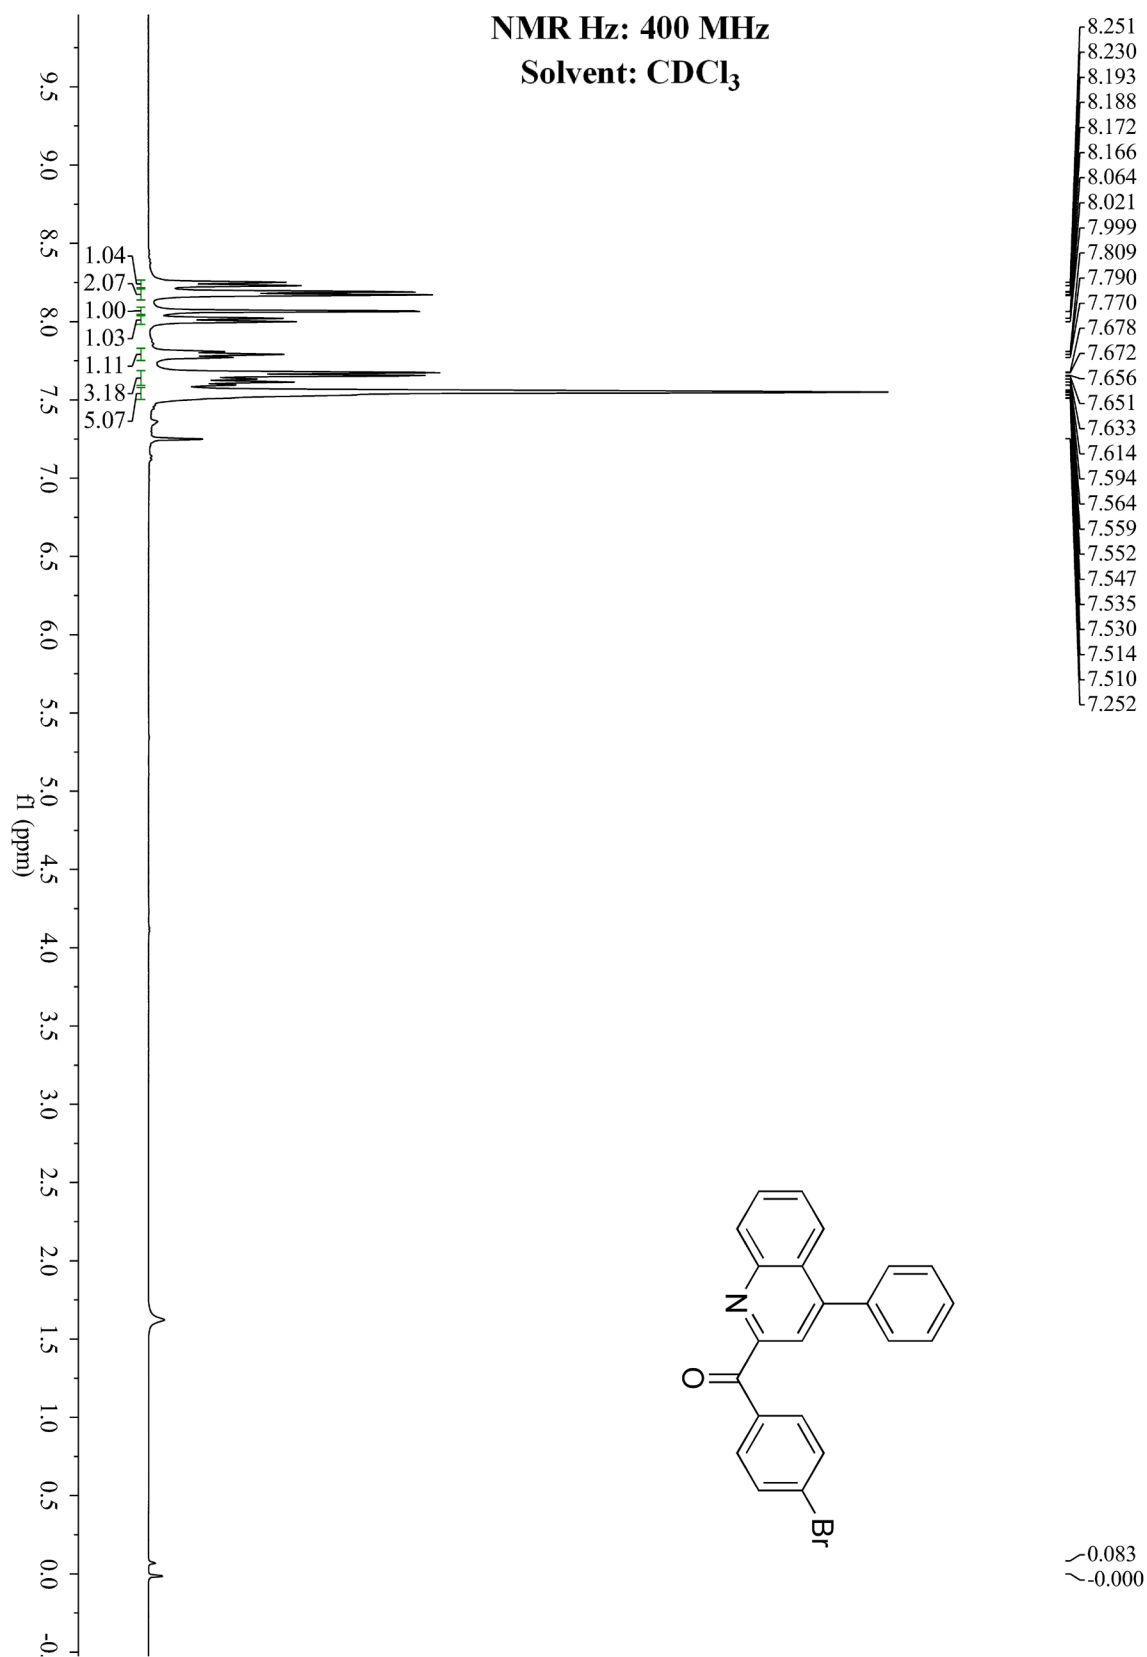

NMR Hz: 100 MHz

Solvent: CDCl<sub>3</sub>

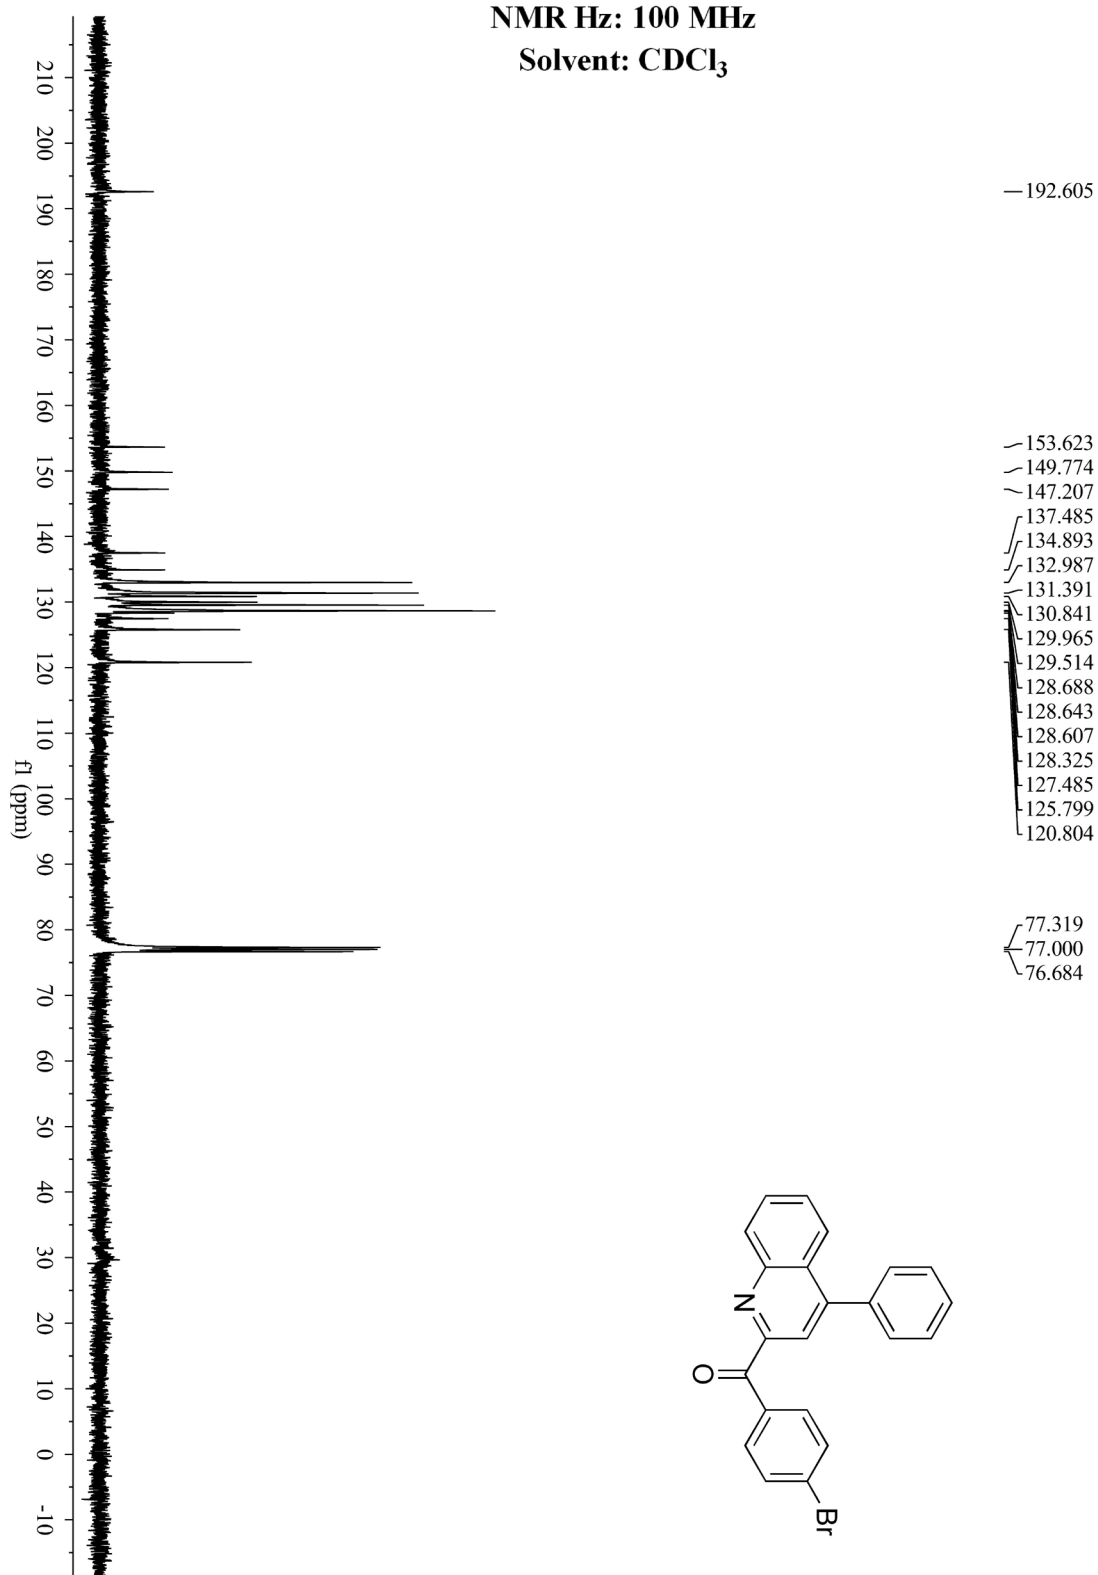

4-(4-Phenylquinoline-2-carbonyl)benzonitrile (3ah)

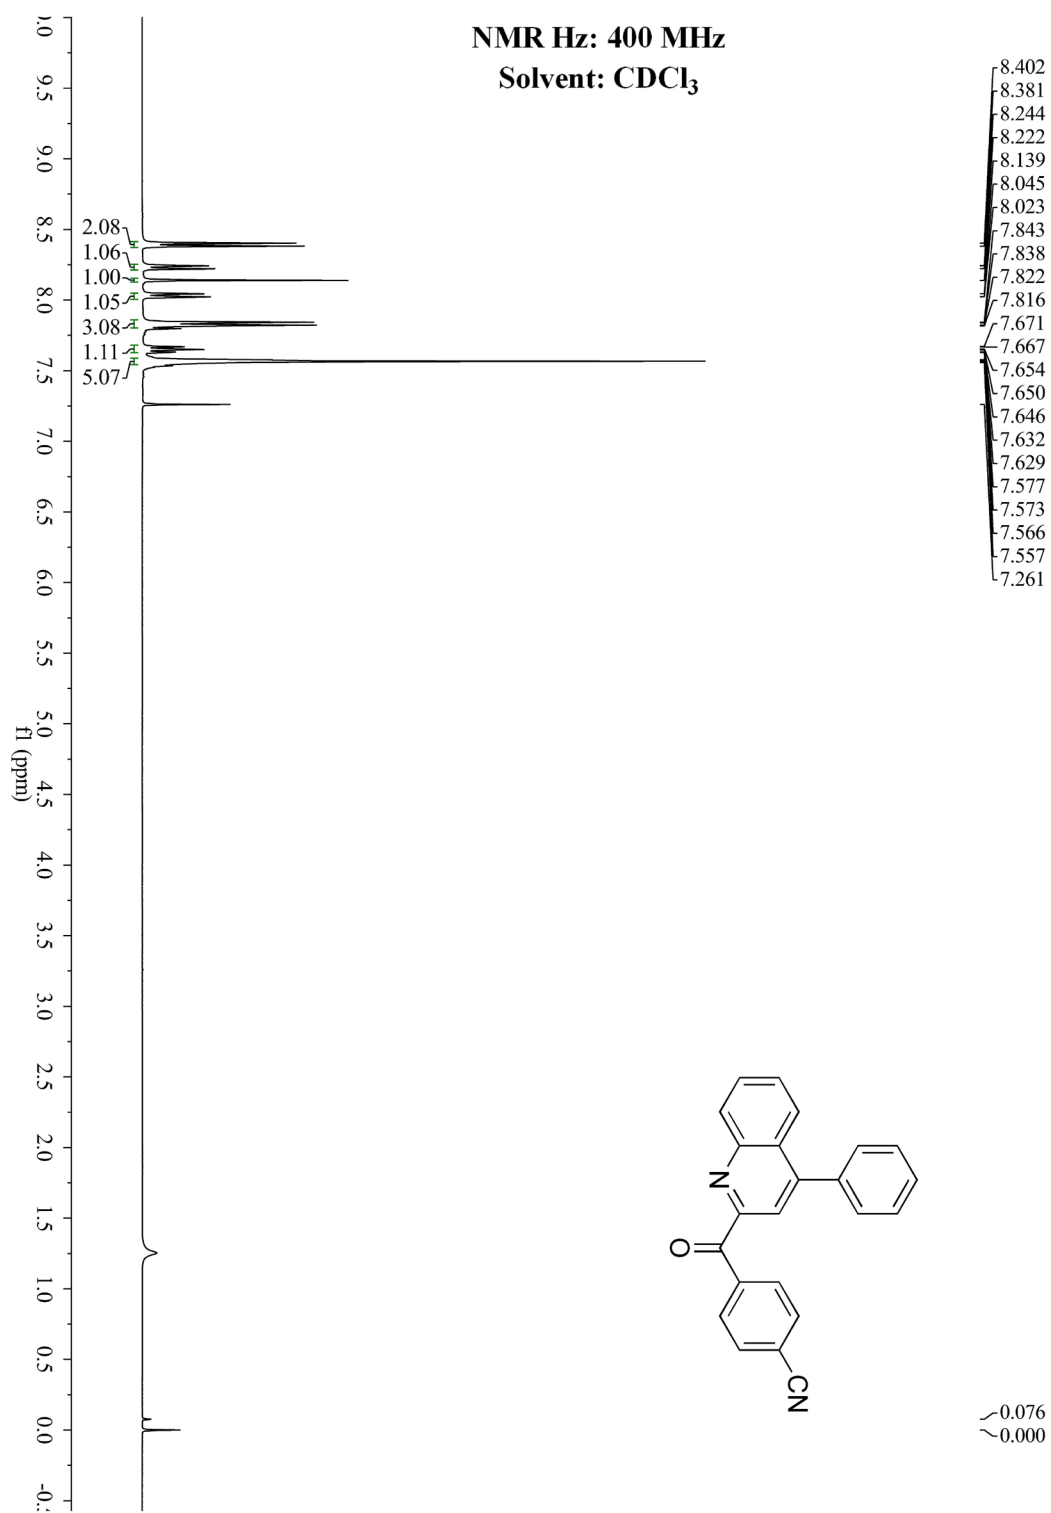

NMR Hz: 100 MHz  
Solvent: CDCl<sub>3</sub>

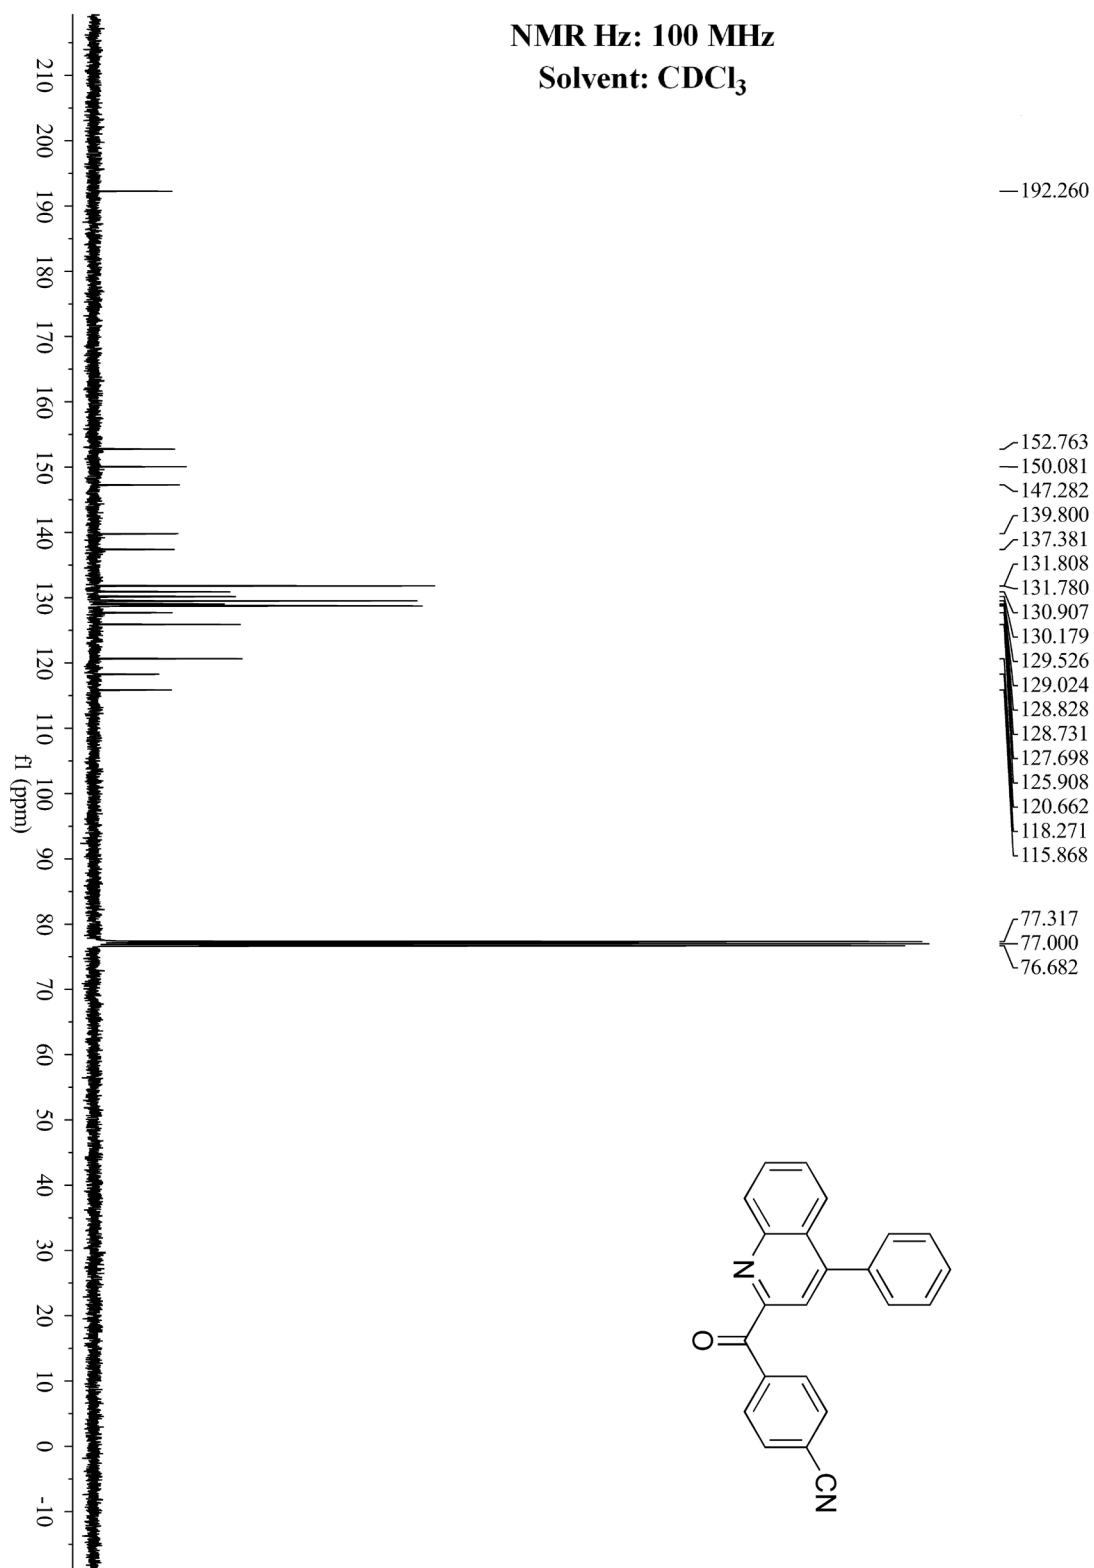

(4-Phenylquinolin-2-yl)(p-tolyl)methanone (3ai)

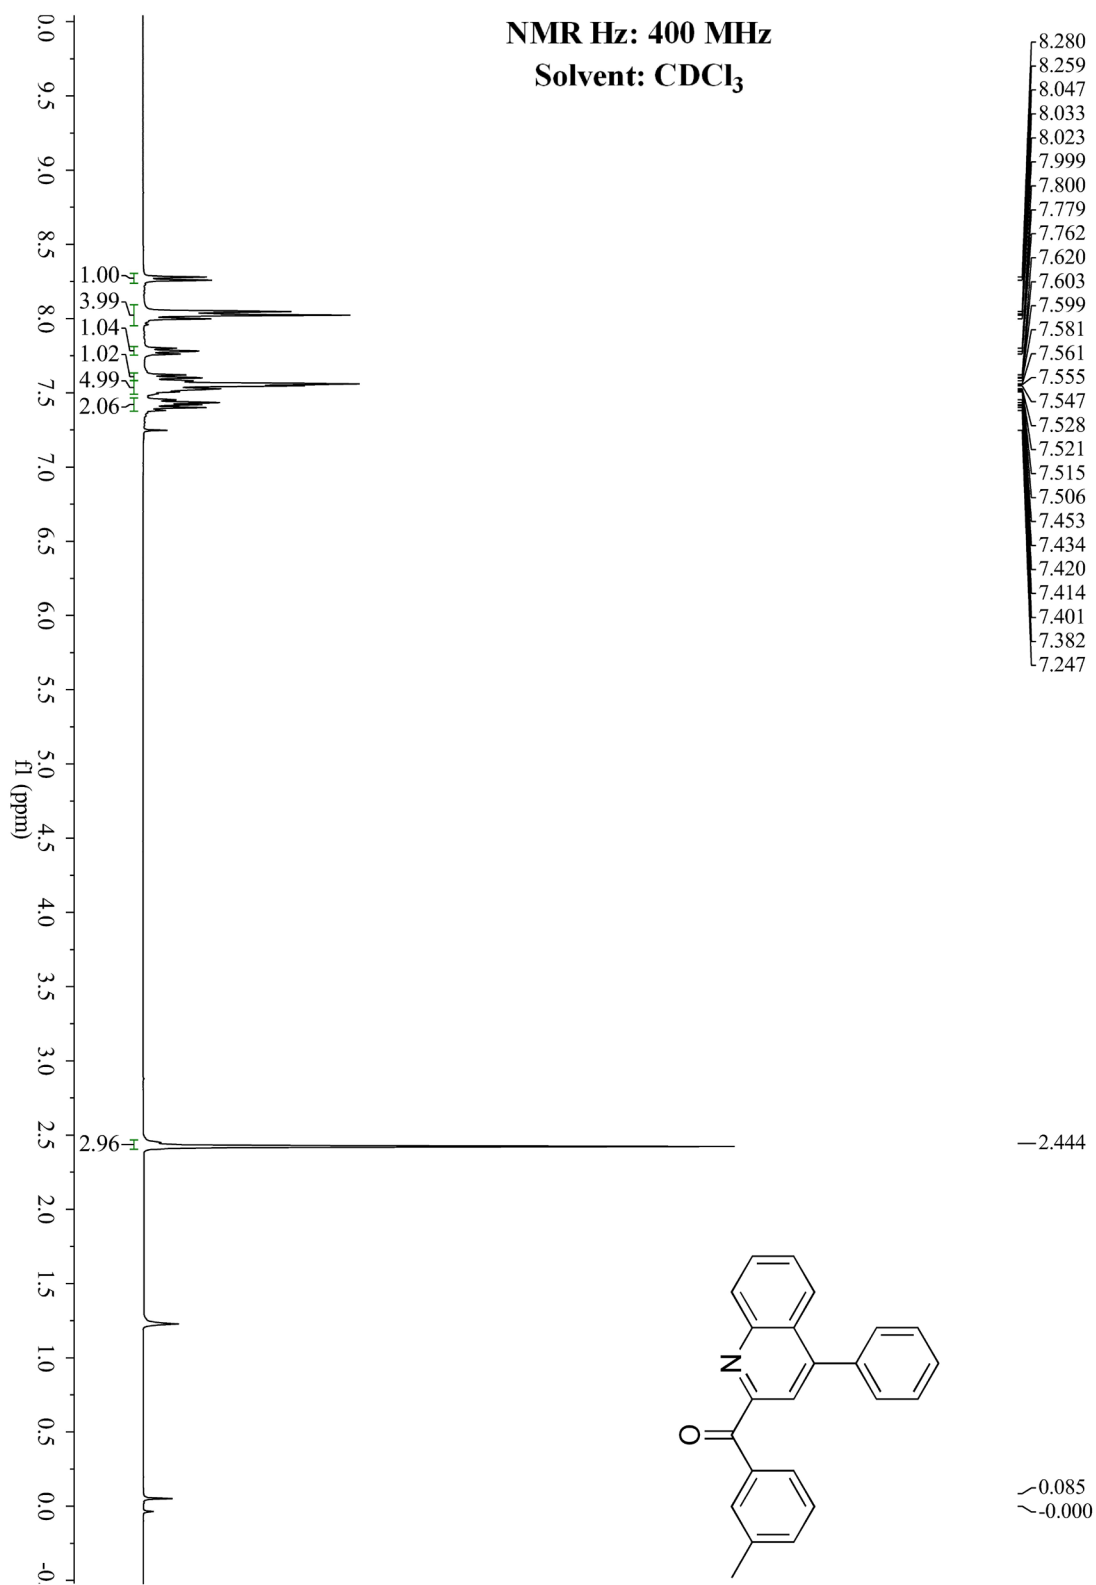

NMR Hz: 100 MHz

Solvent: CDCl<sub>3</sub>

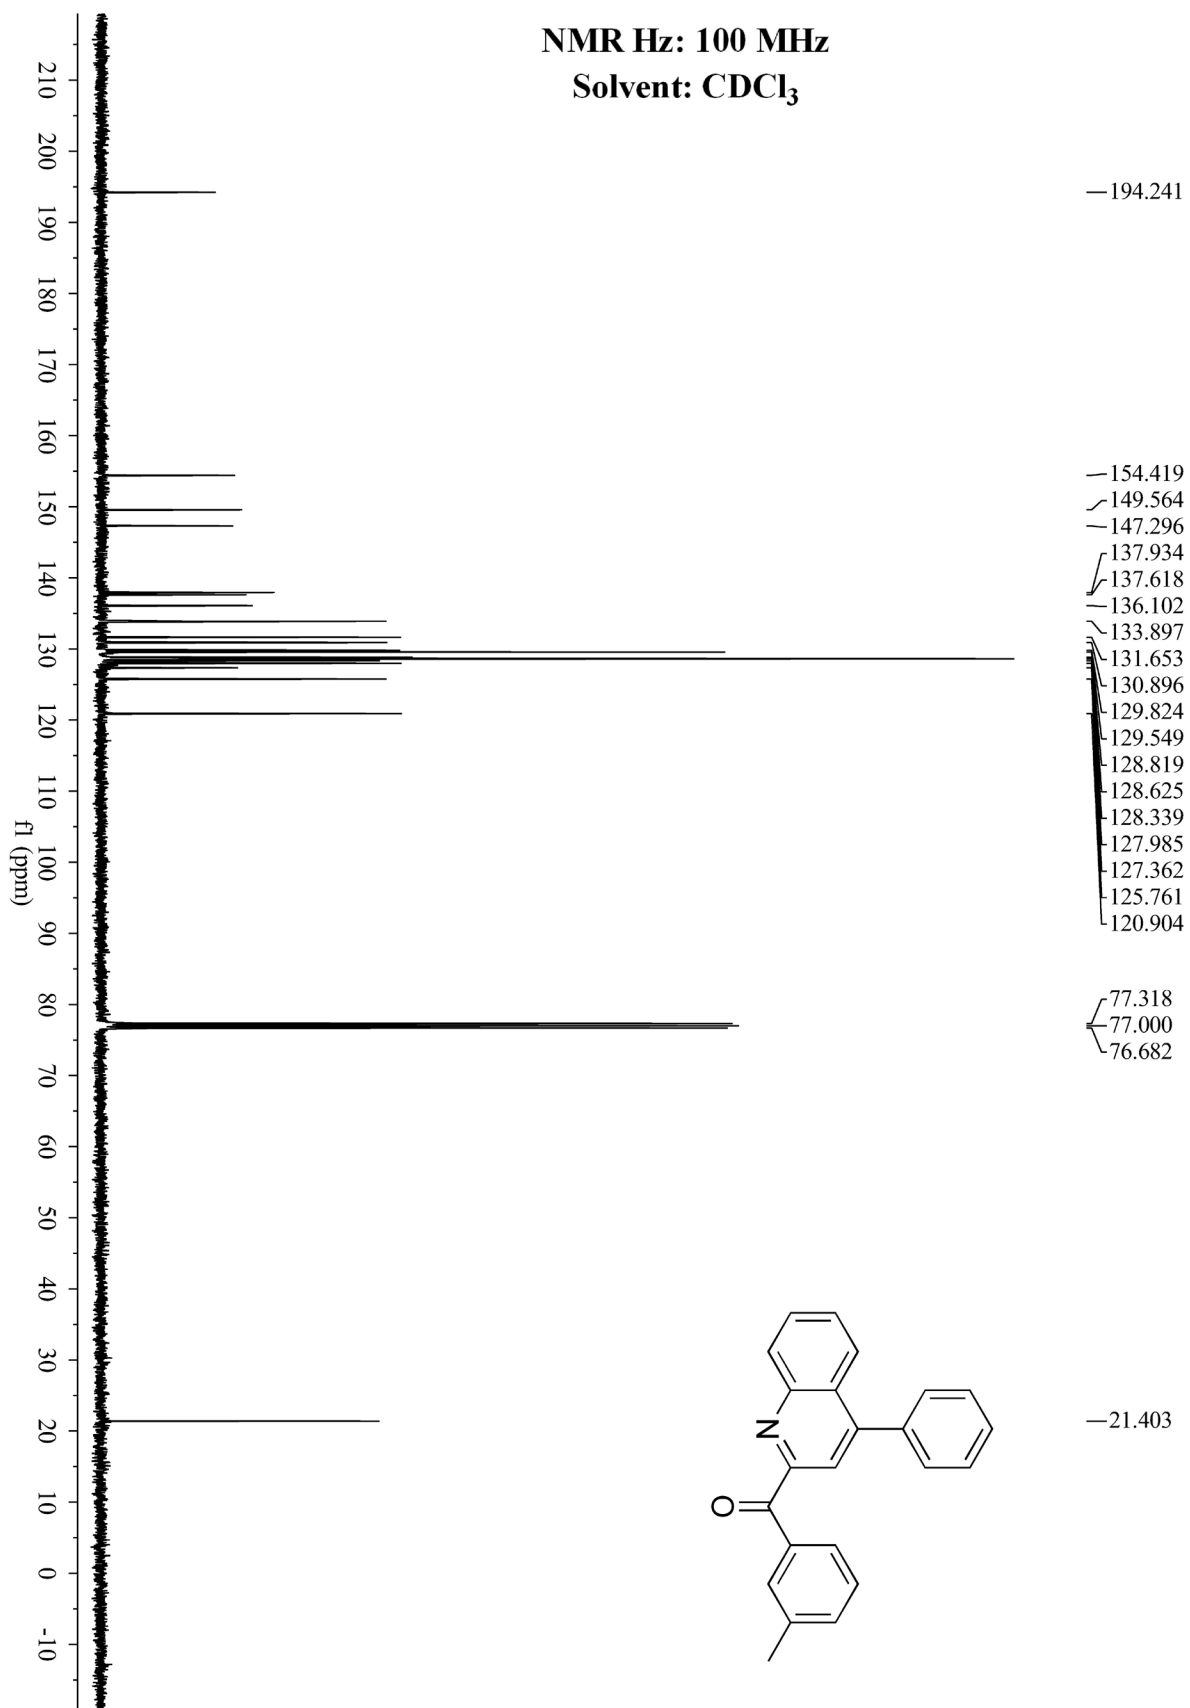



(3-Methoxyphenyl)(4-phenylquinolin-2-yl)methanone(3aj)

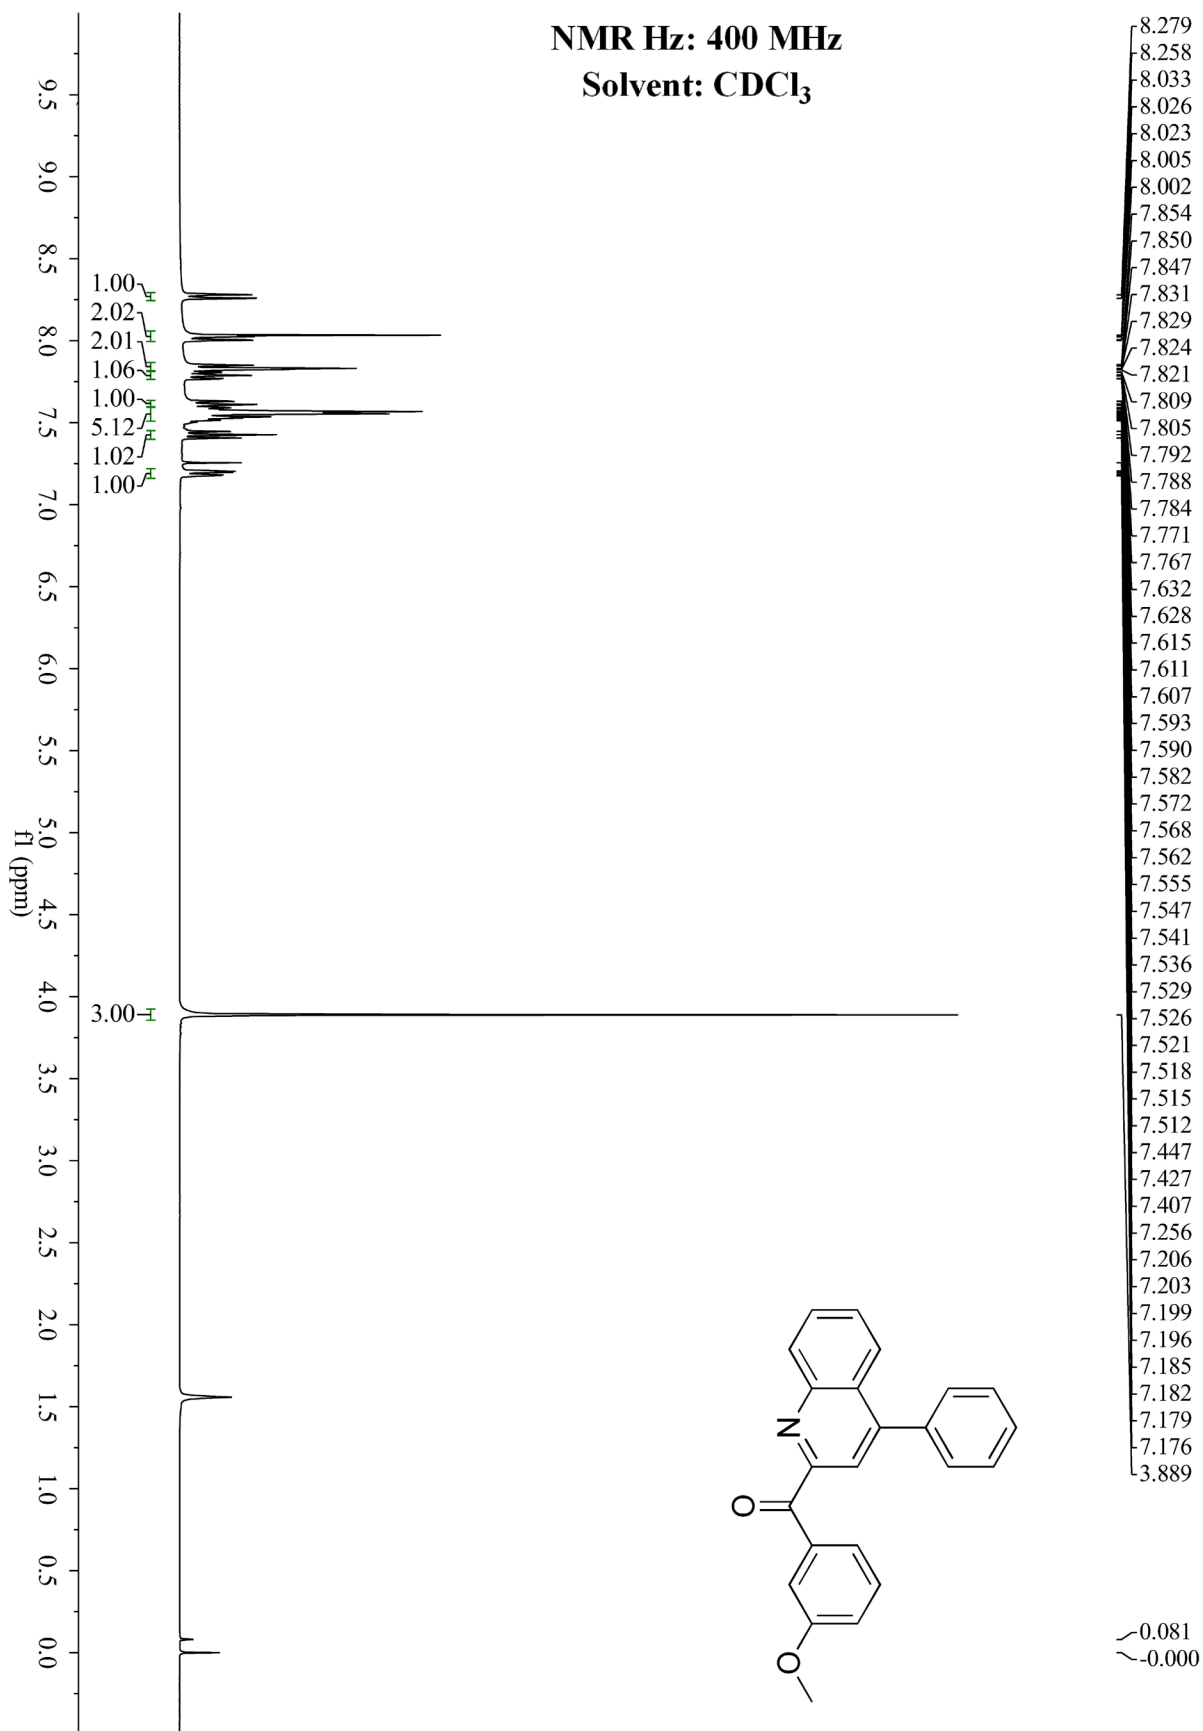

NMR Hz: 100 MHz

Solvent: CDCl<sub>3</sub>

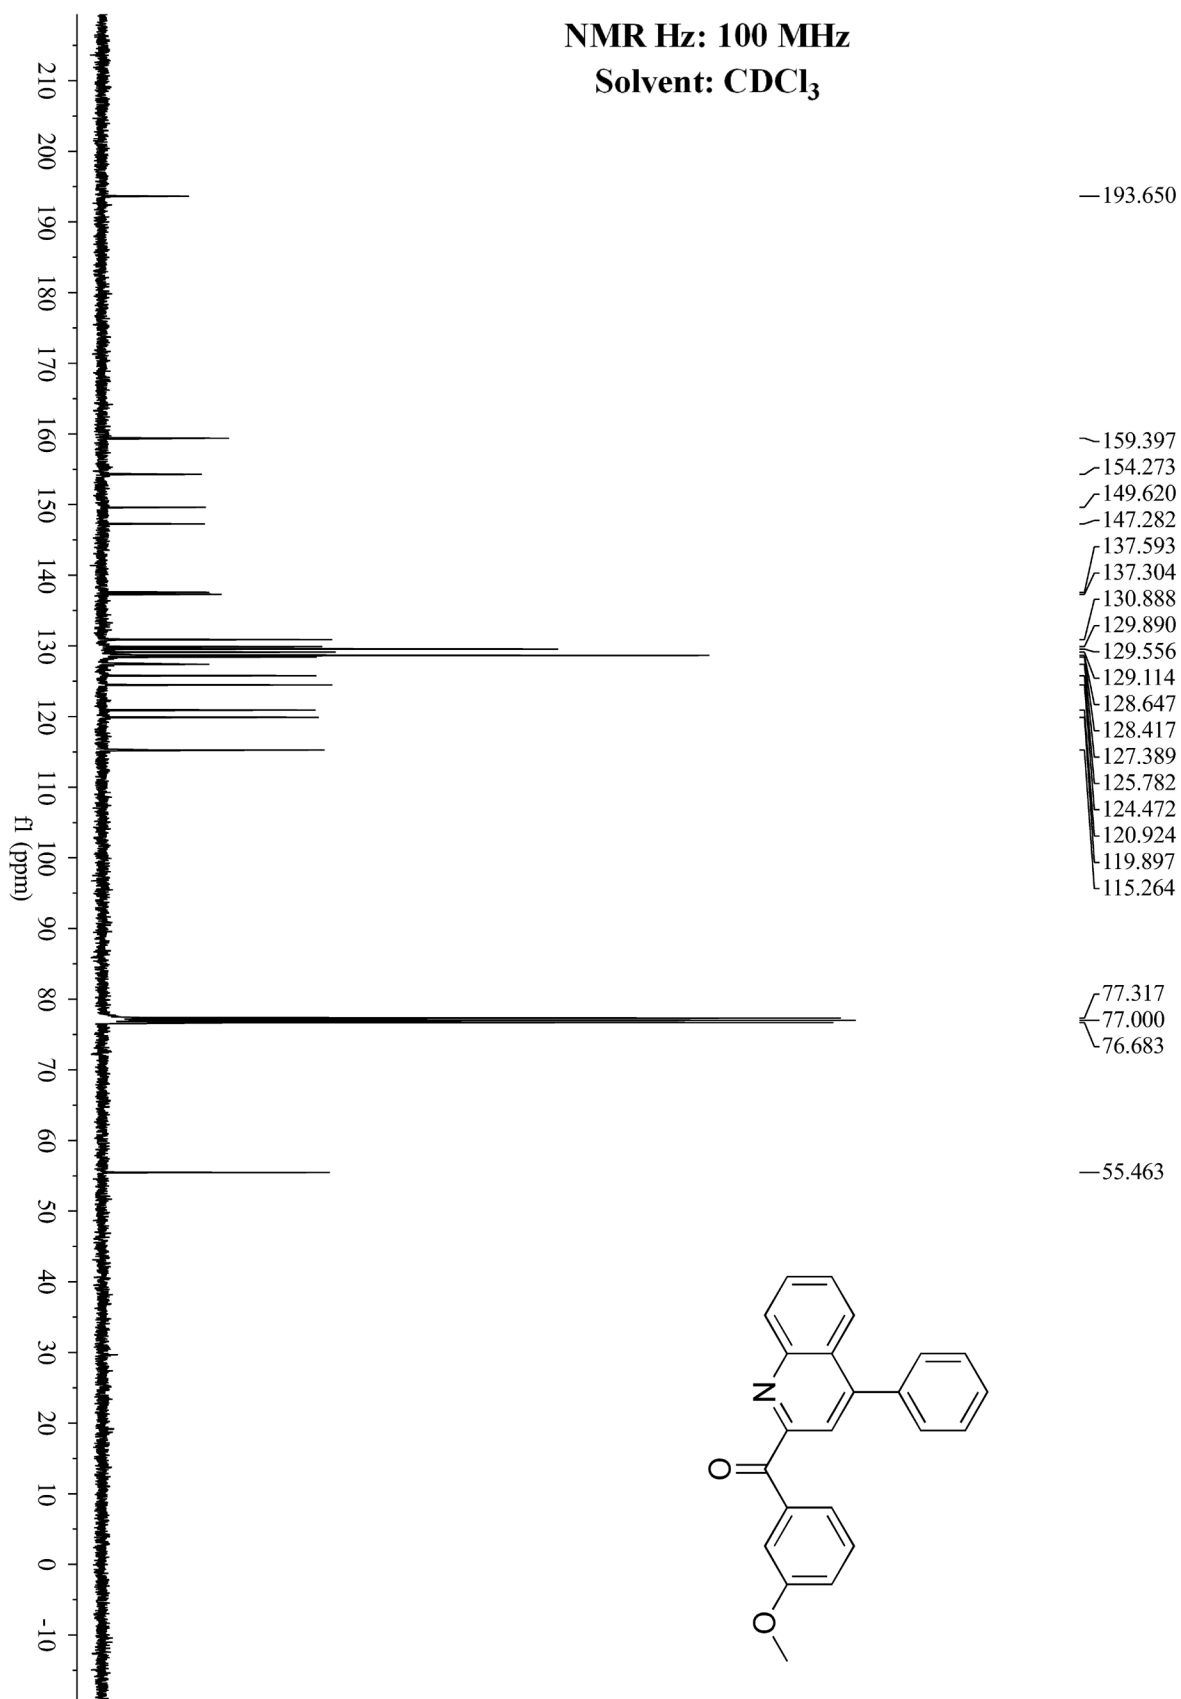

(3-Fluorophenyl)(4-phenylquinolin-2-yl)methanone (3ak)

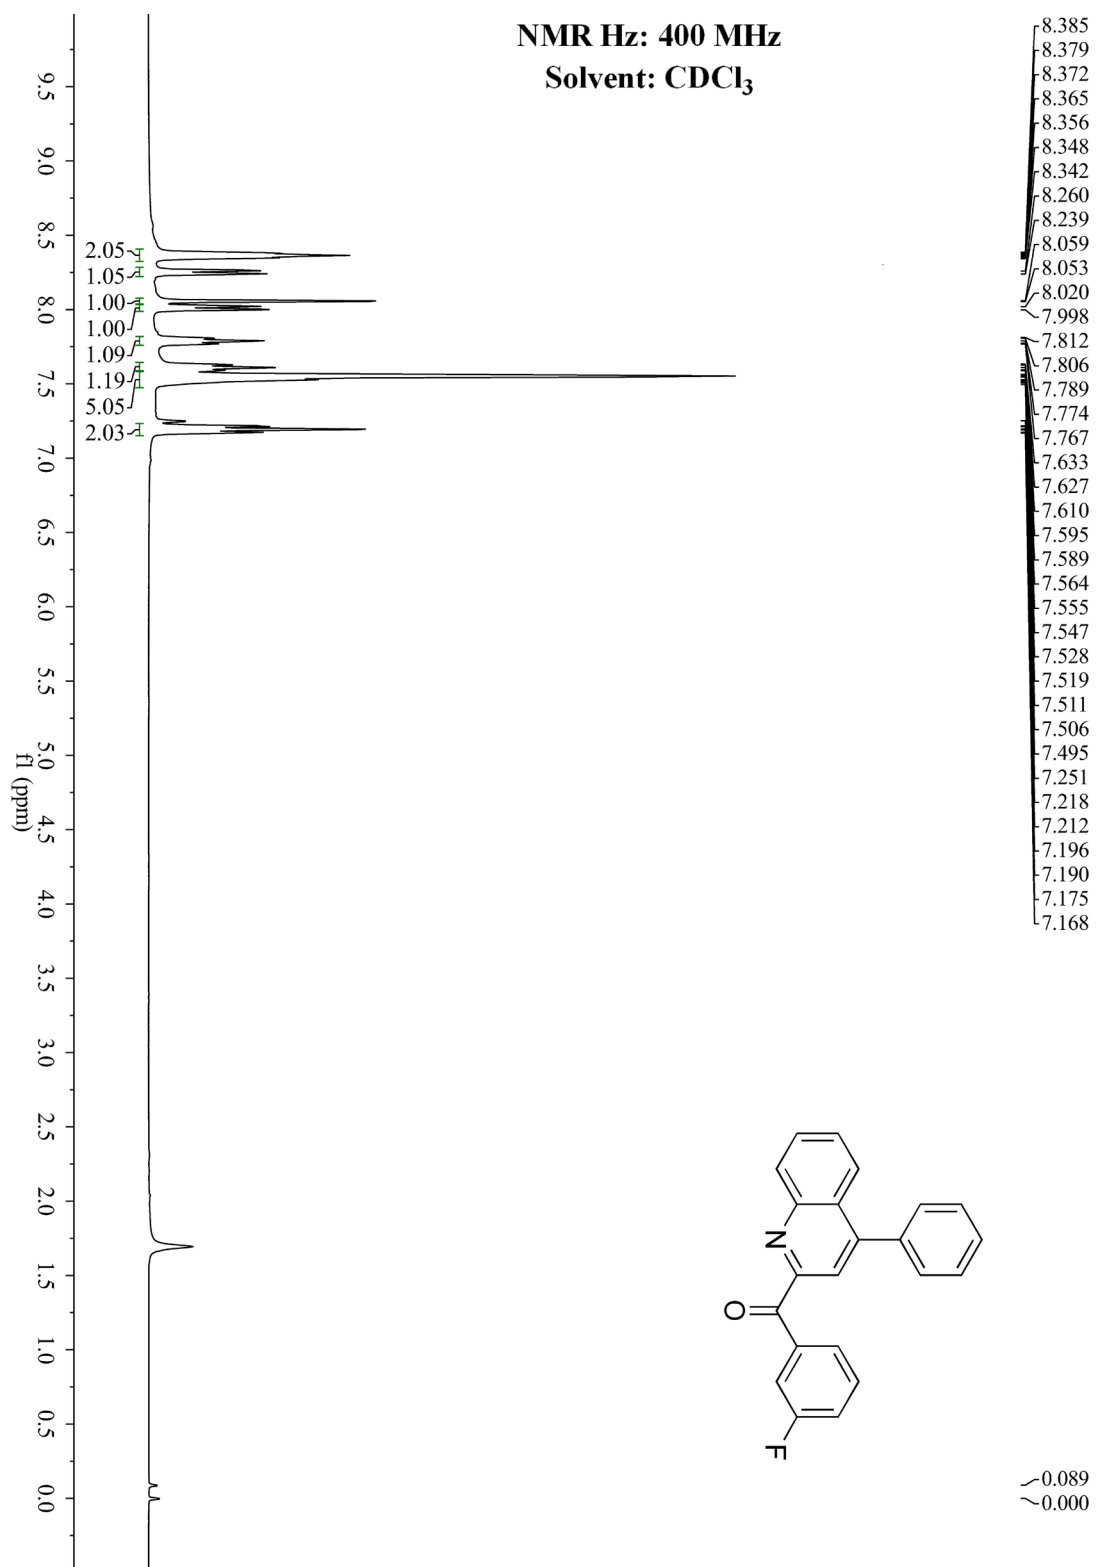

NMR Hz: 100 MHz  
Solvent: CDCl<sub>3</sub>

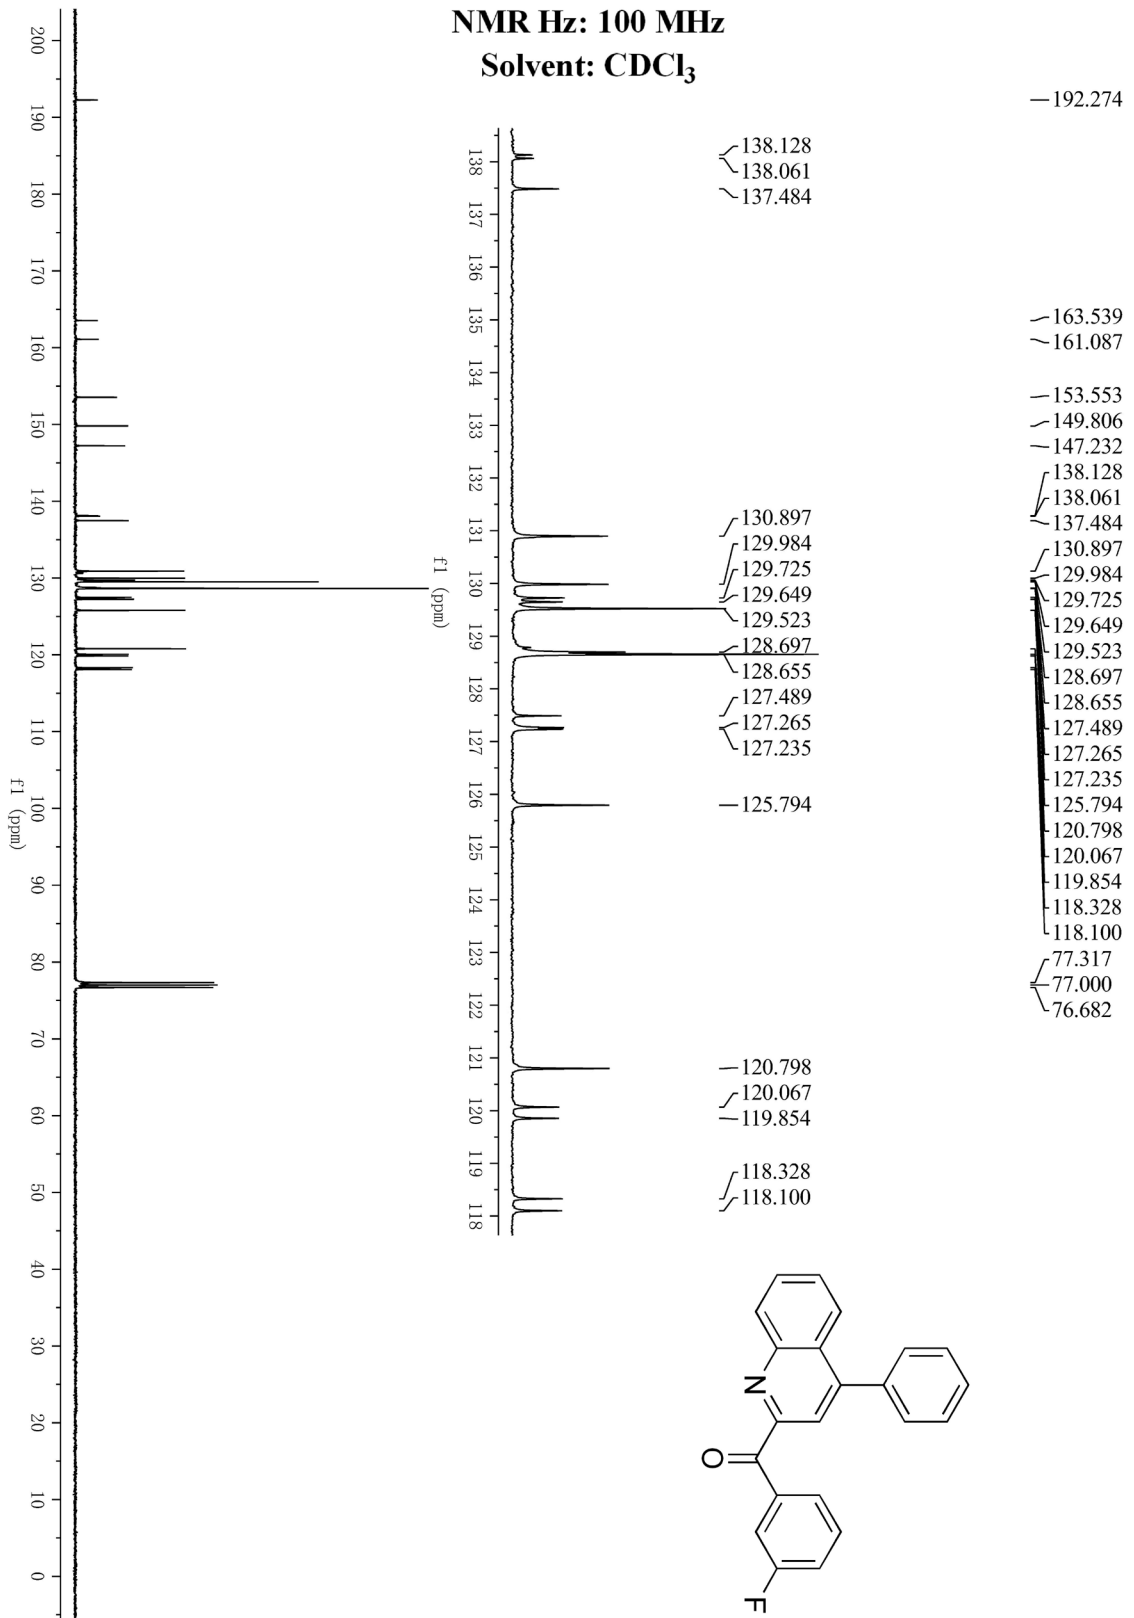

NMR Hz: 282 MHz  
Solvent: CDCl<sub>3</sub>

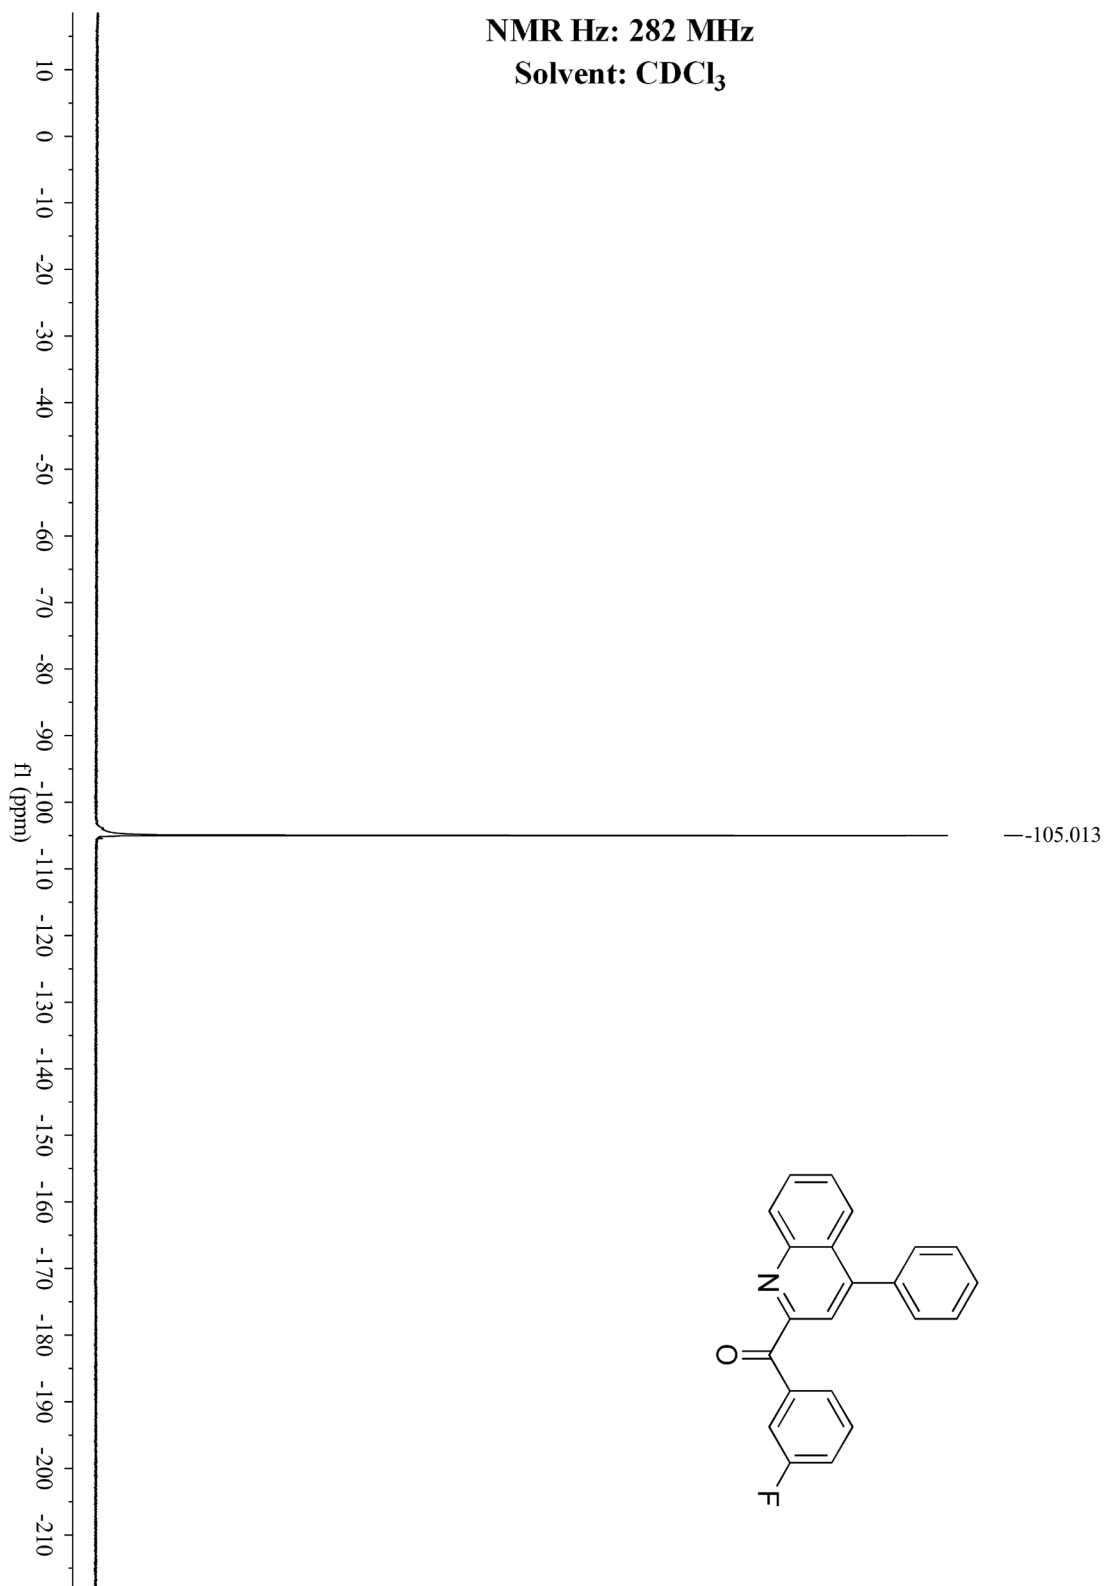

(3-Chlorophenyl)(4-phenylquinolin-2-yl)methanone (3al)

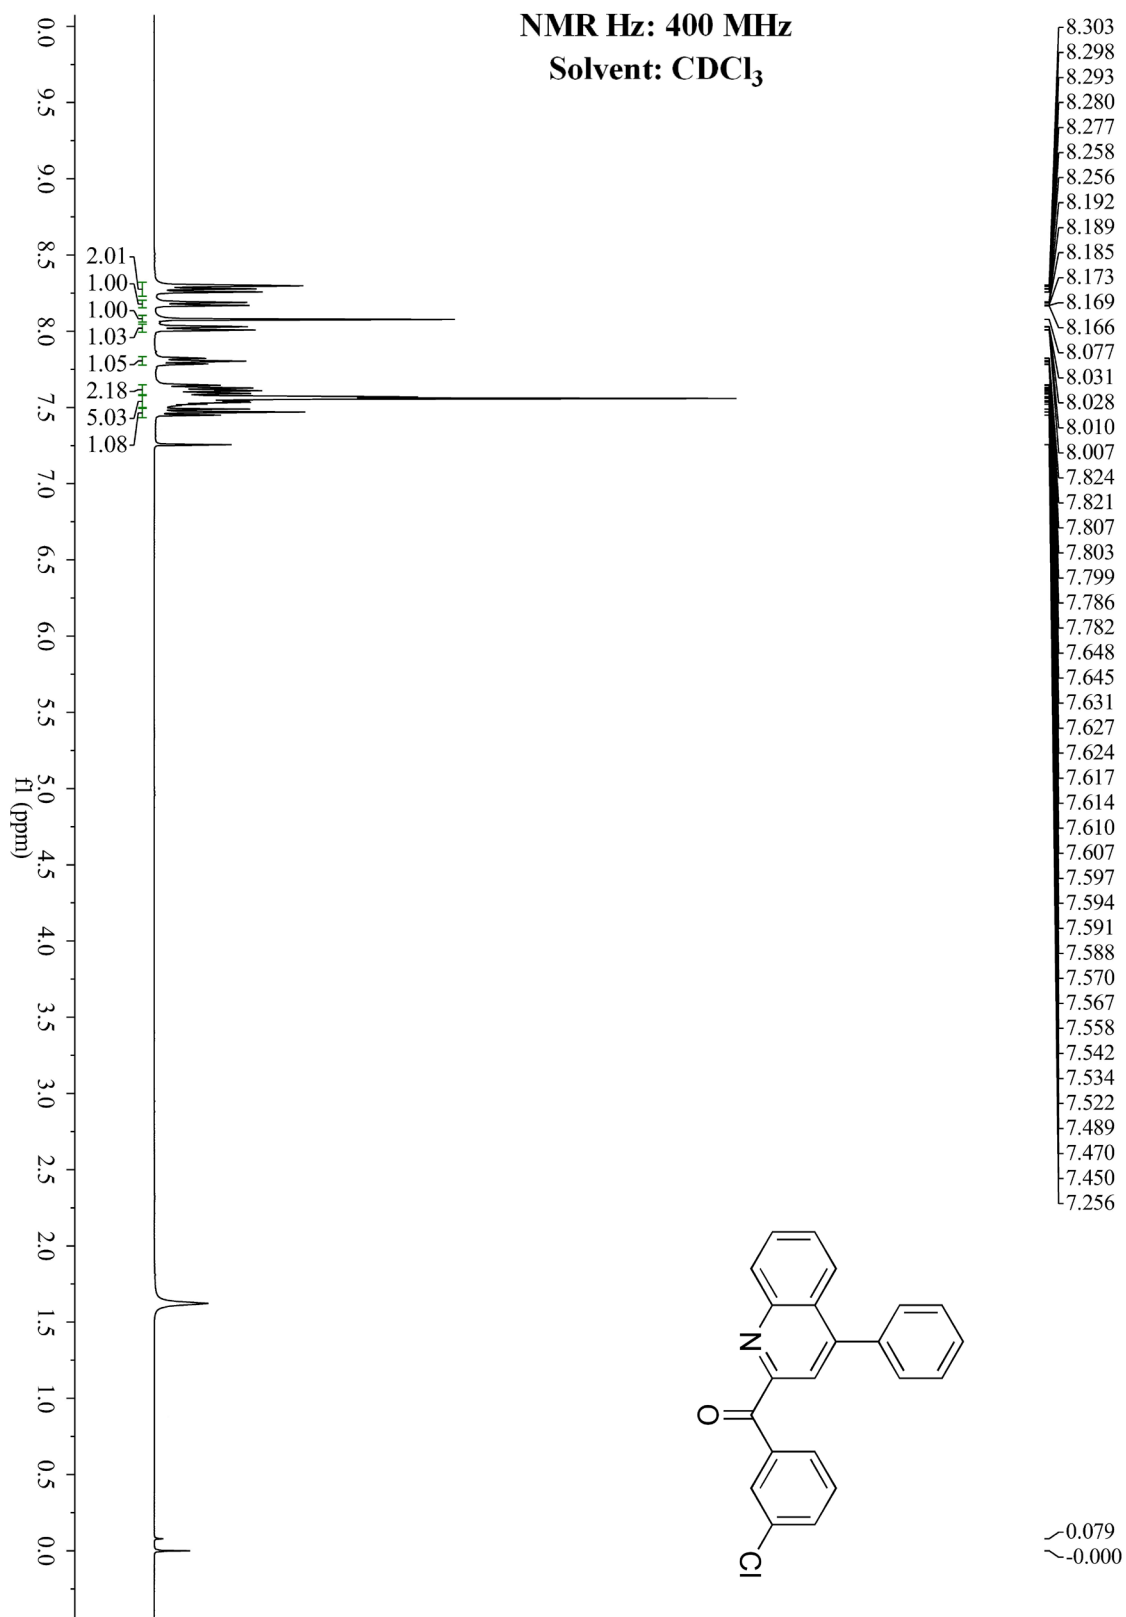

NMR Hz: 100 MHz

Solvent: CDCl<sub>3</sub>

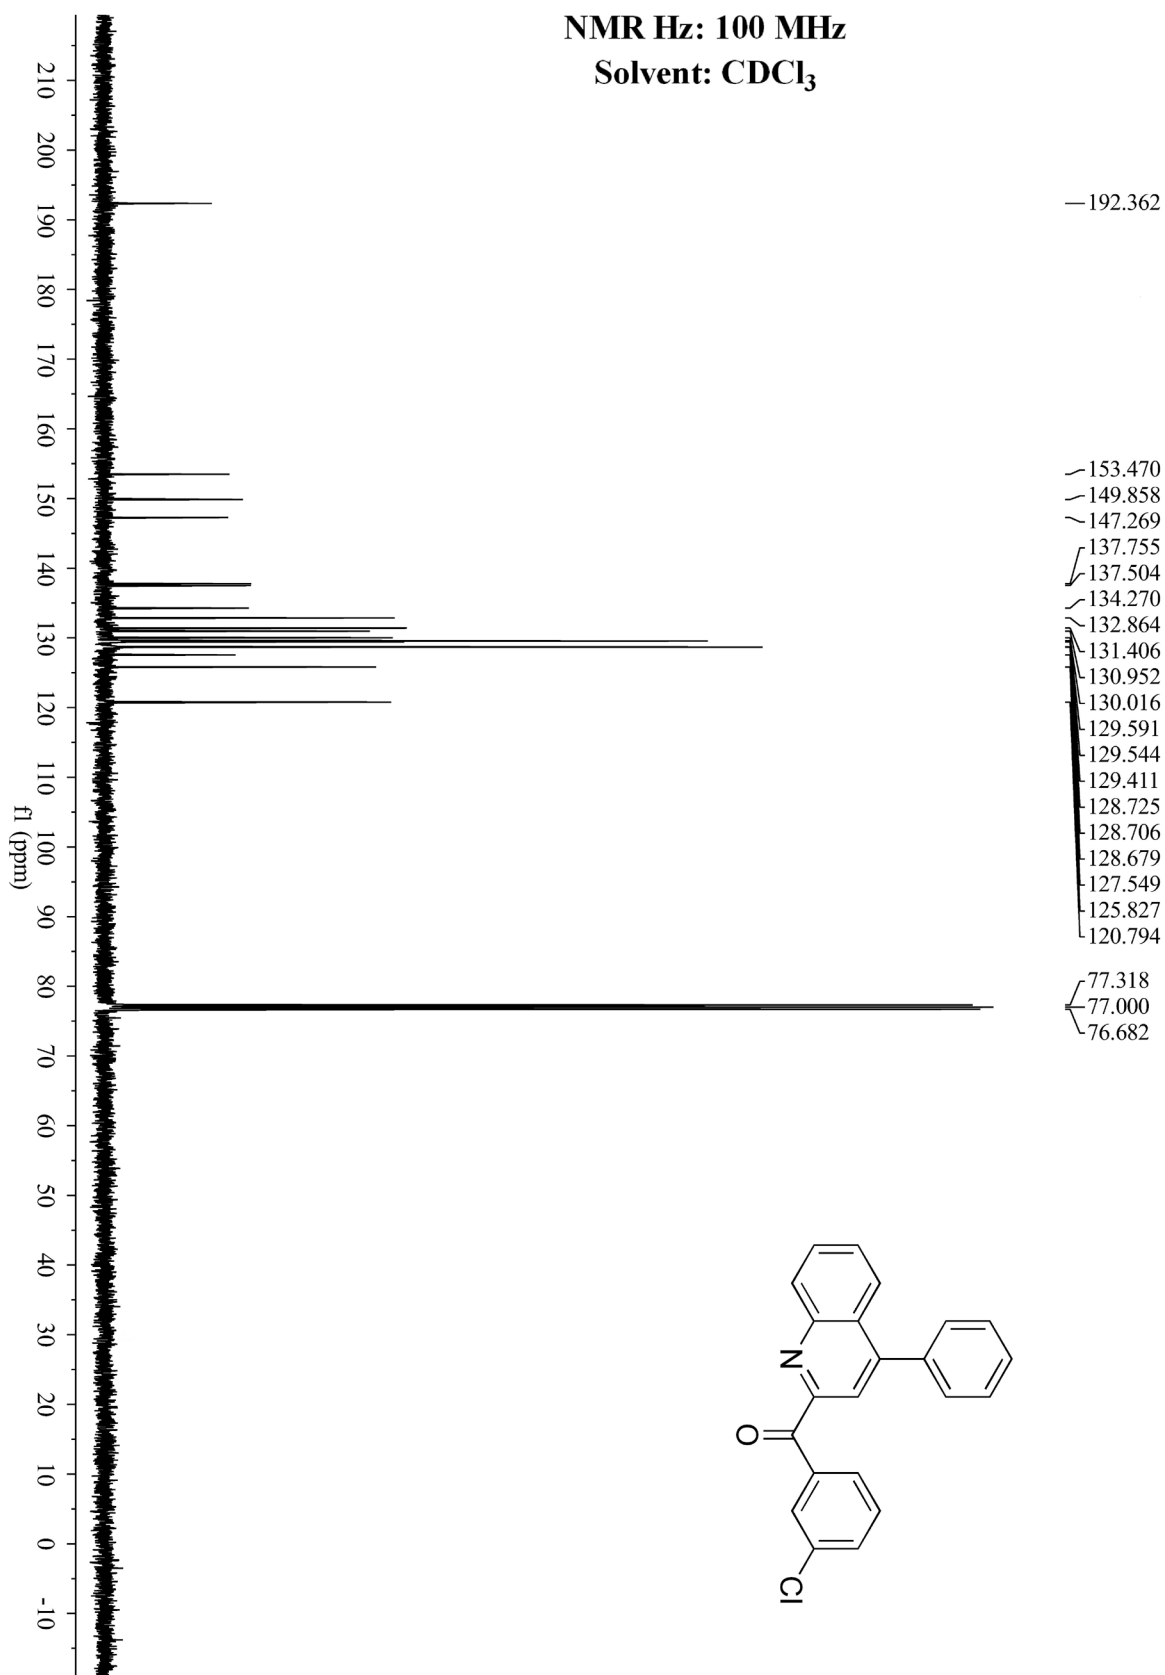

(3-Bromophenyl)(4-phenylquinolin-2-yl)methanone (3am)

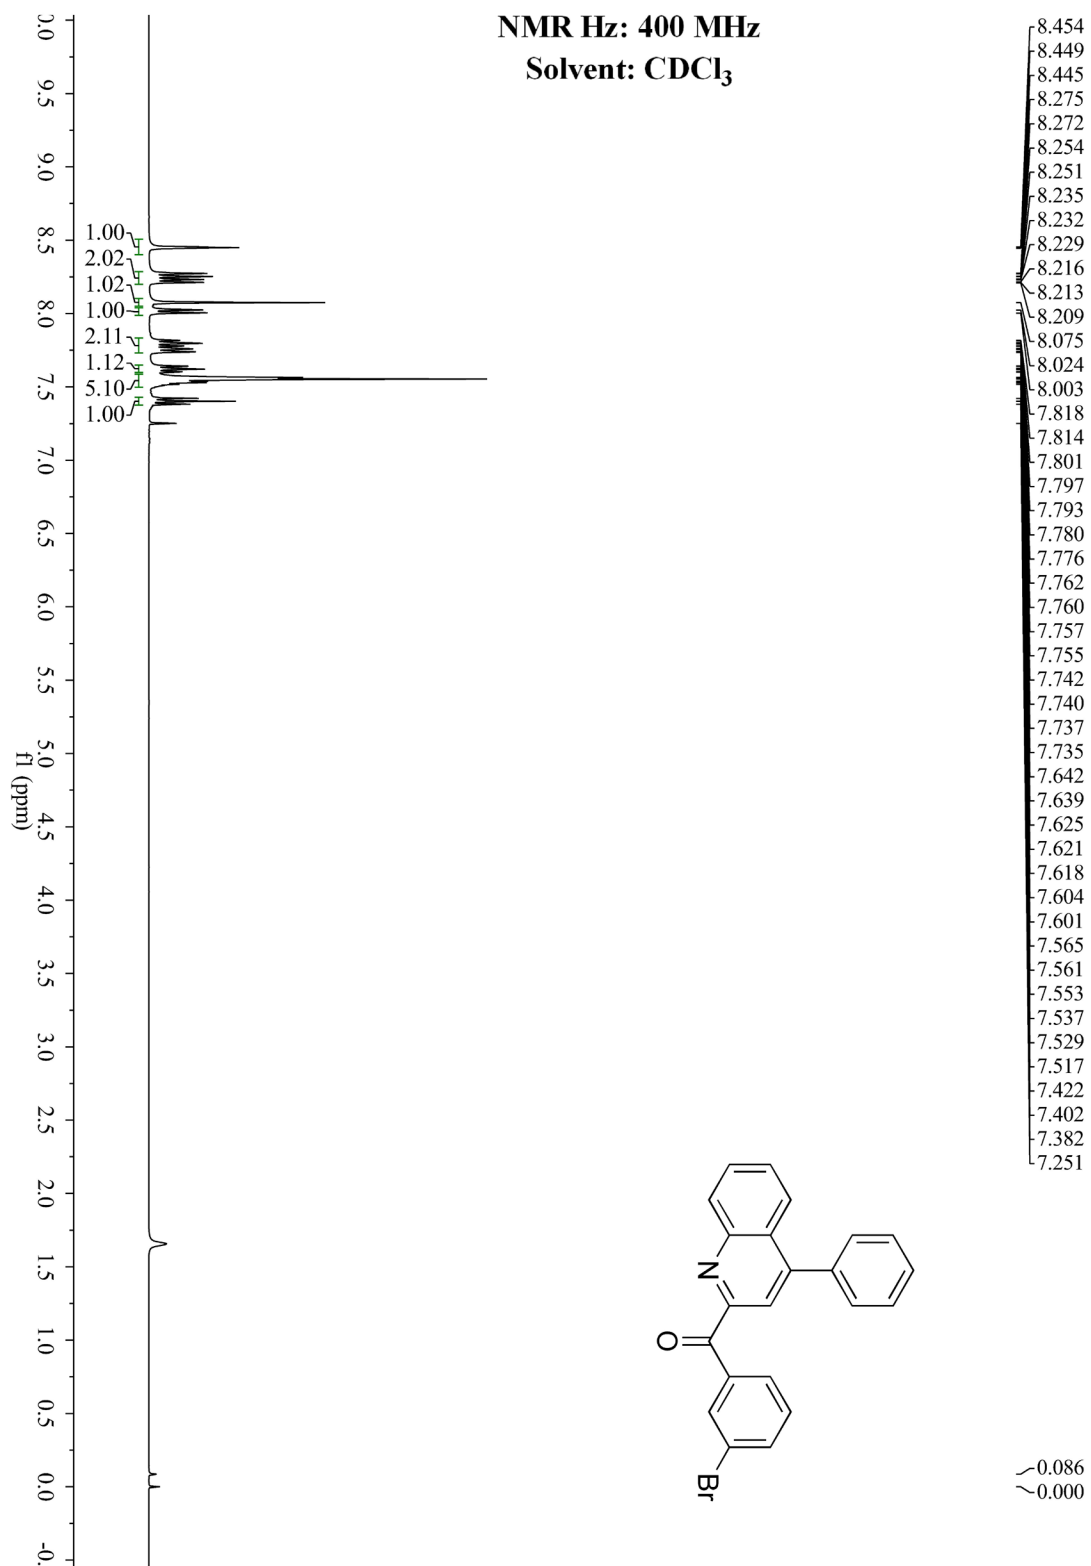



NMR Hz: 100 MHz  
Solvent: CDCl<sub>3</sub>

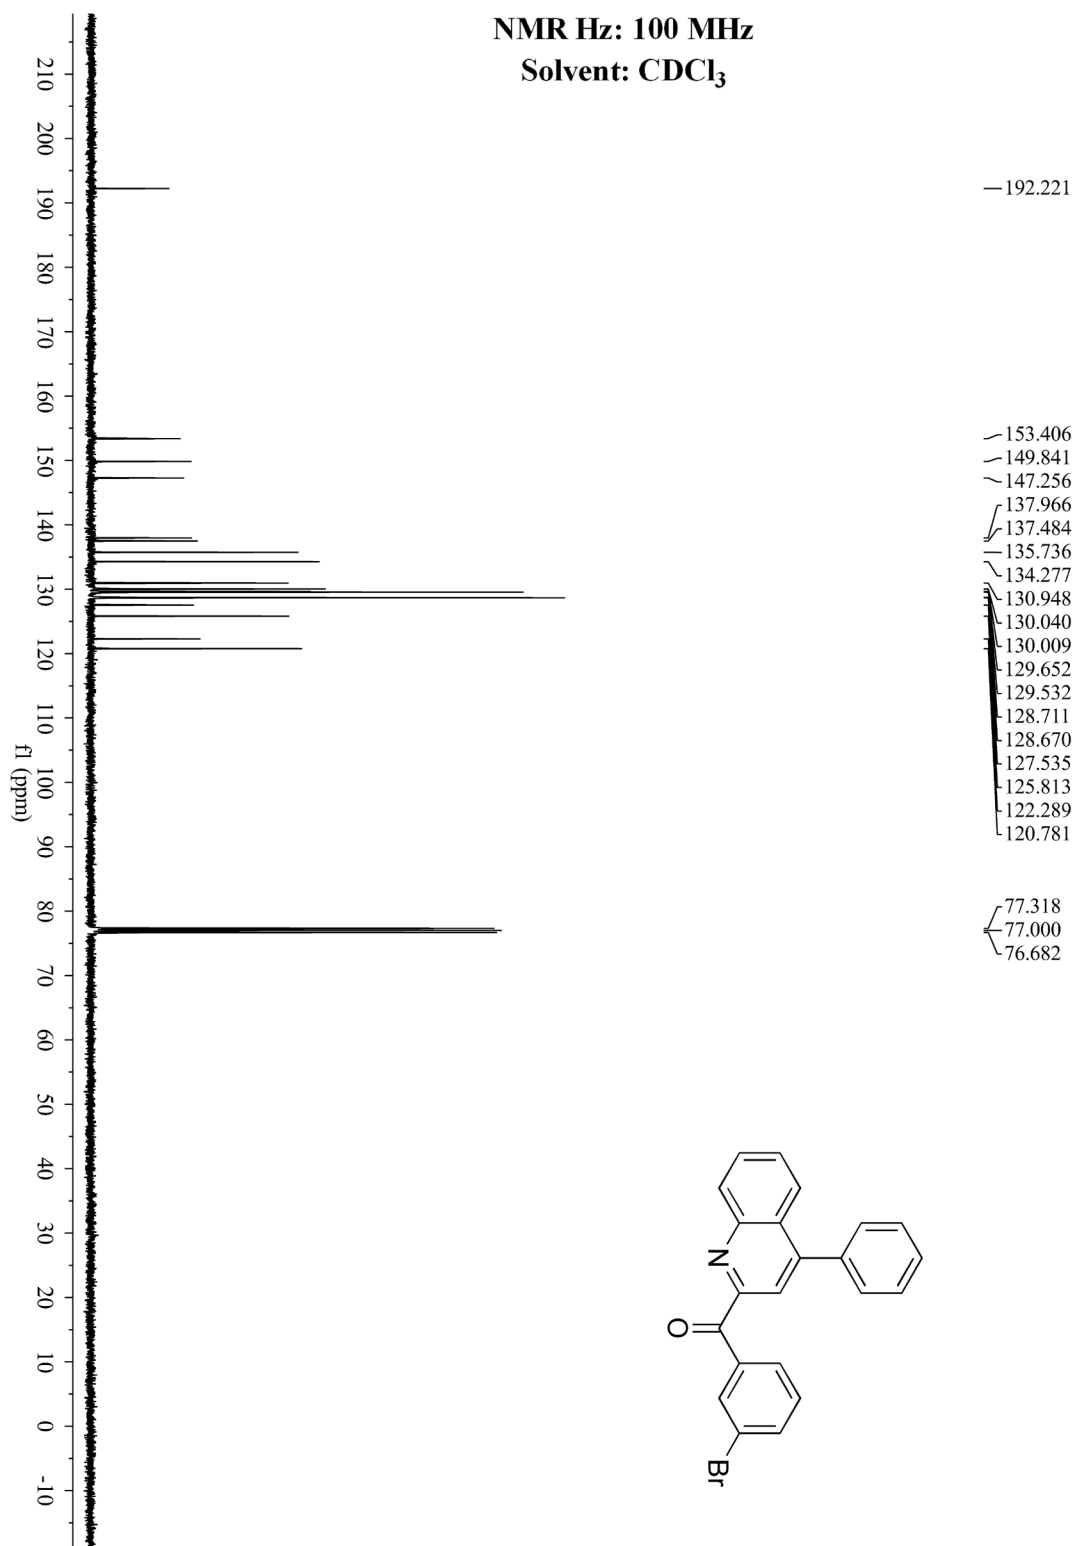

(4-Phenylquinolin-2-yl)(o-tolyl)methanone(3an)

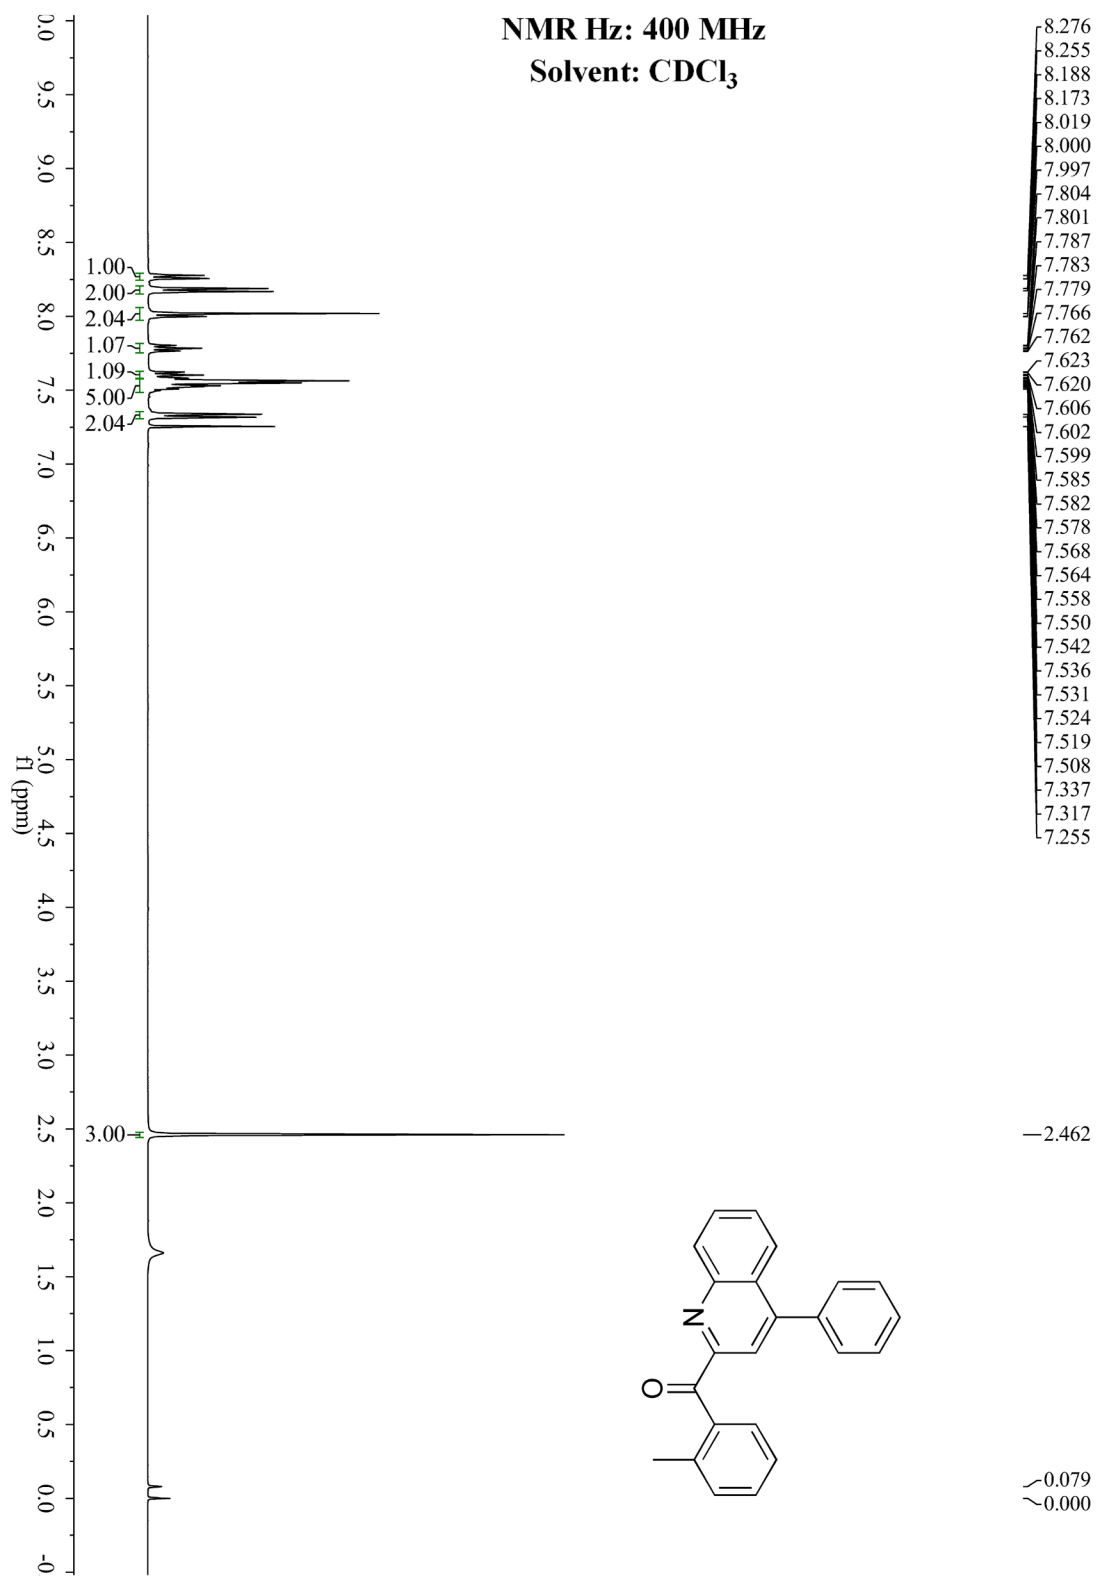

NMR Hz: 100 MHz  
Solvent: CDCl<sub>3</sub>

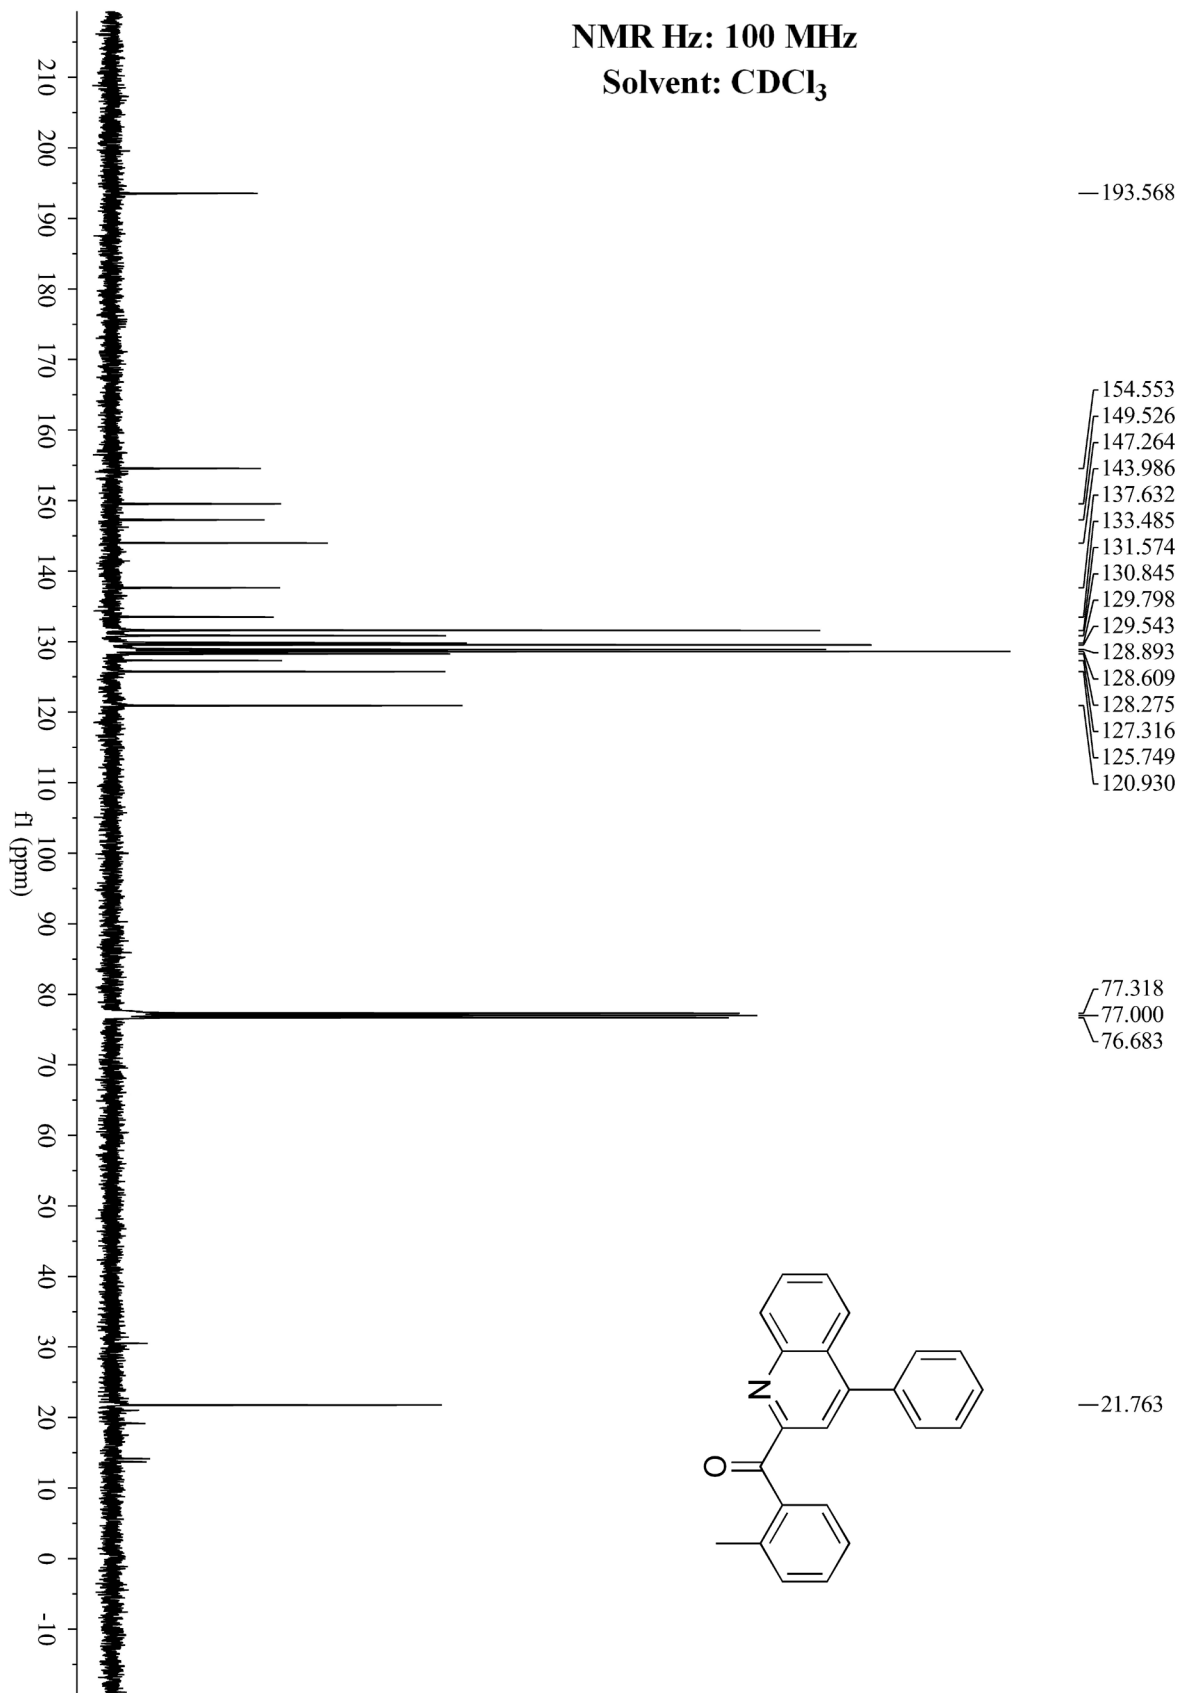

(2-Fluorophenyl)(4-phenylquinolin-2-yl)methanone (3ao)

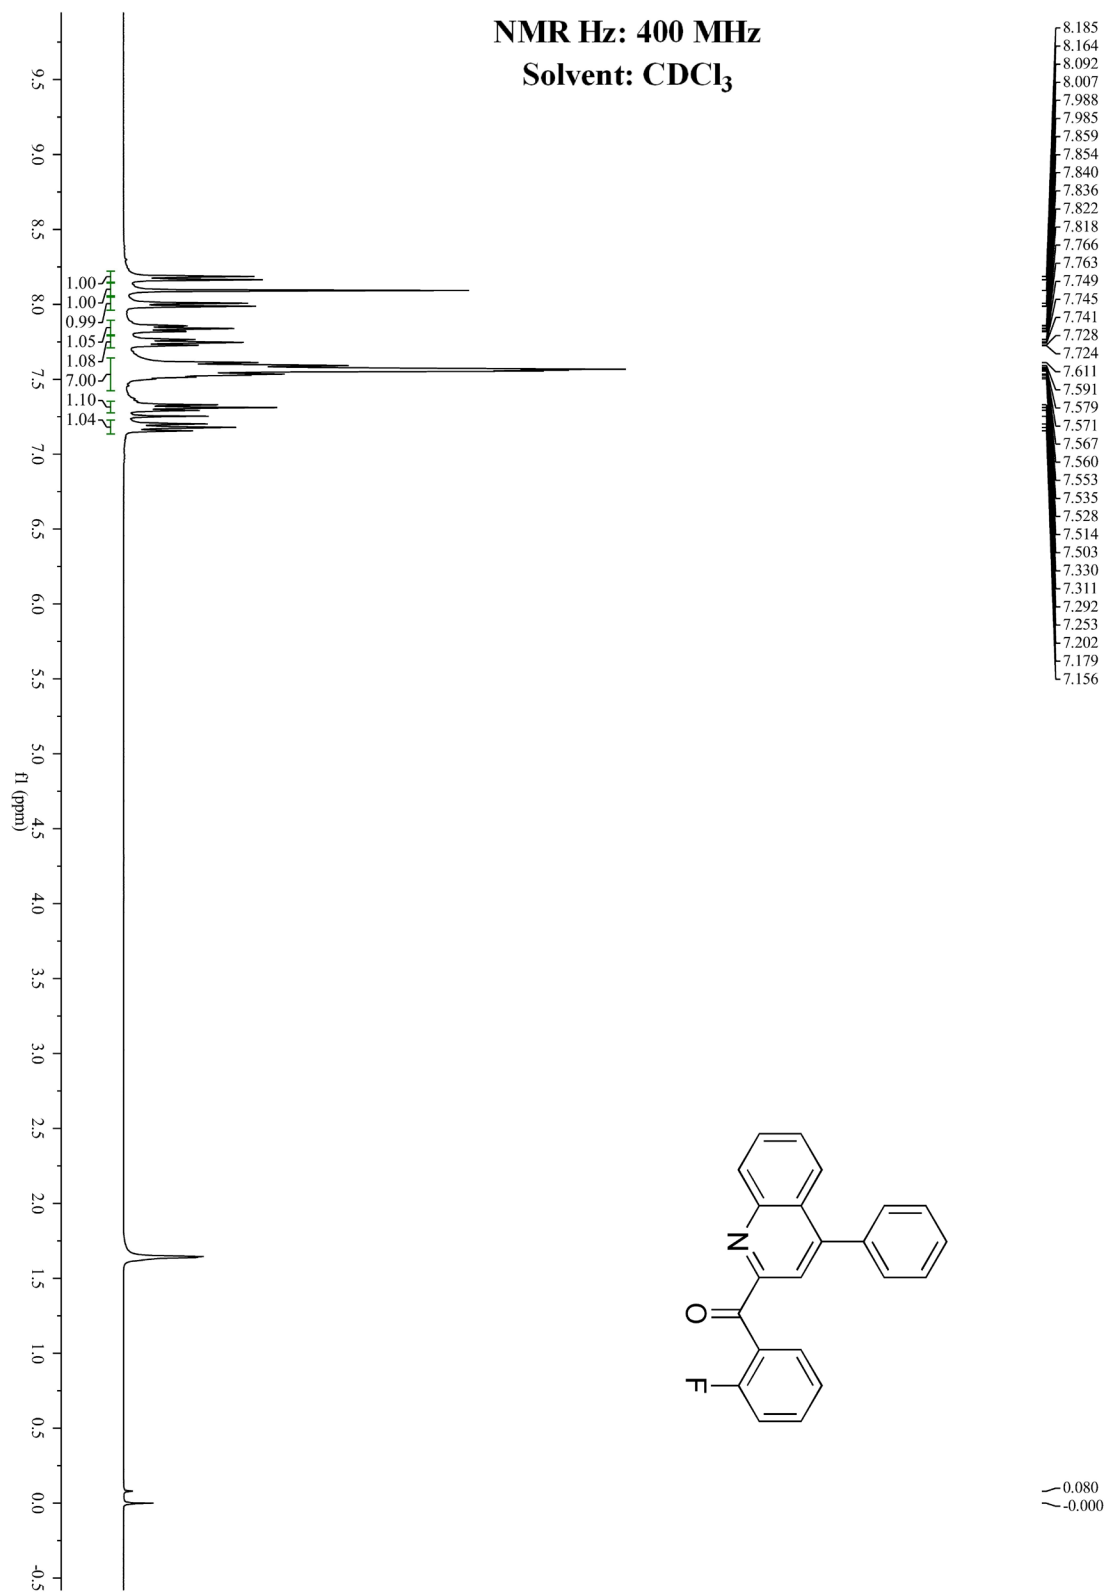

NMR Hz: 100 MHz  
Solvent: CDCl<sub>3</sub>

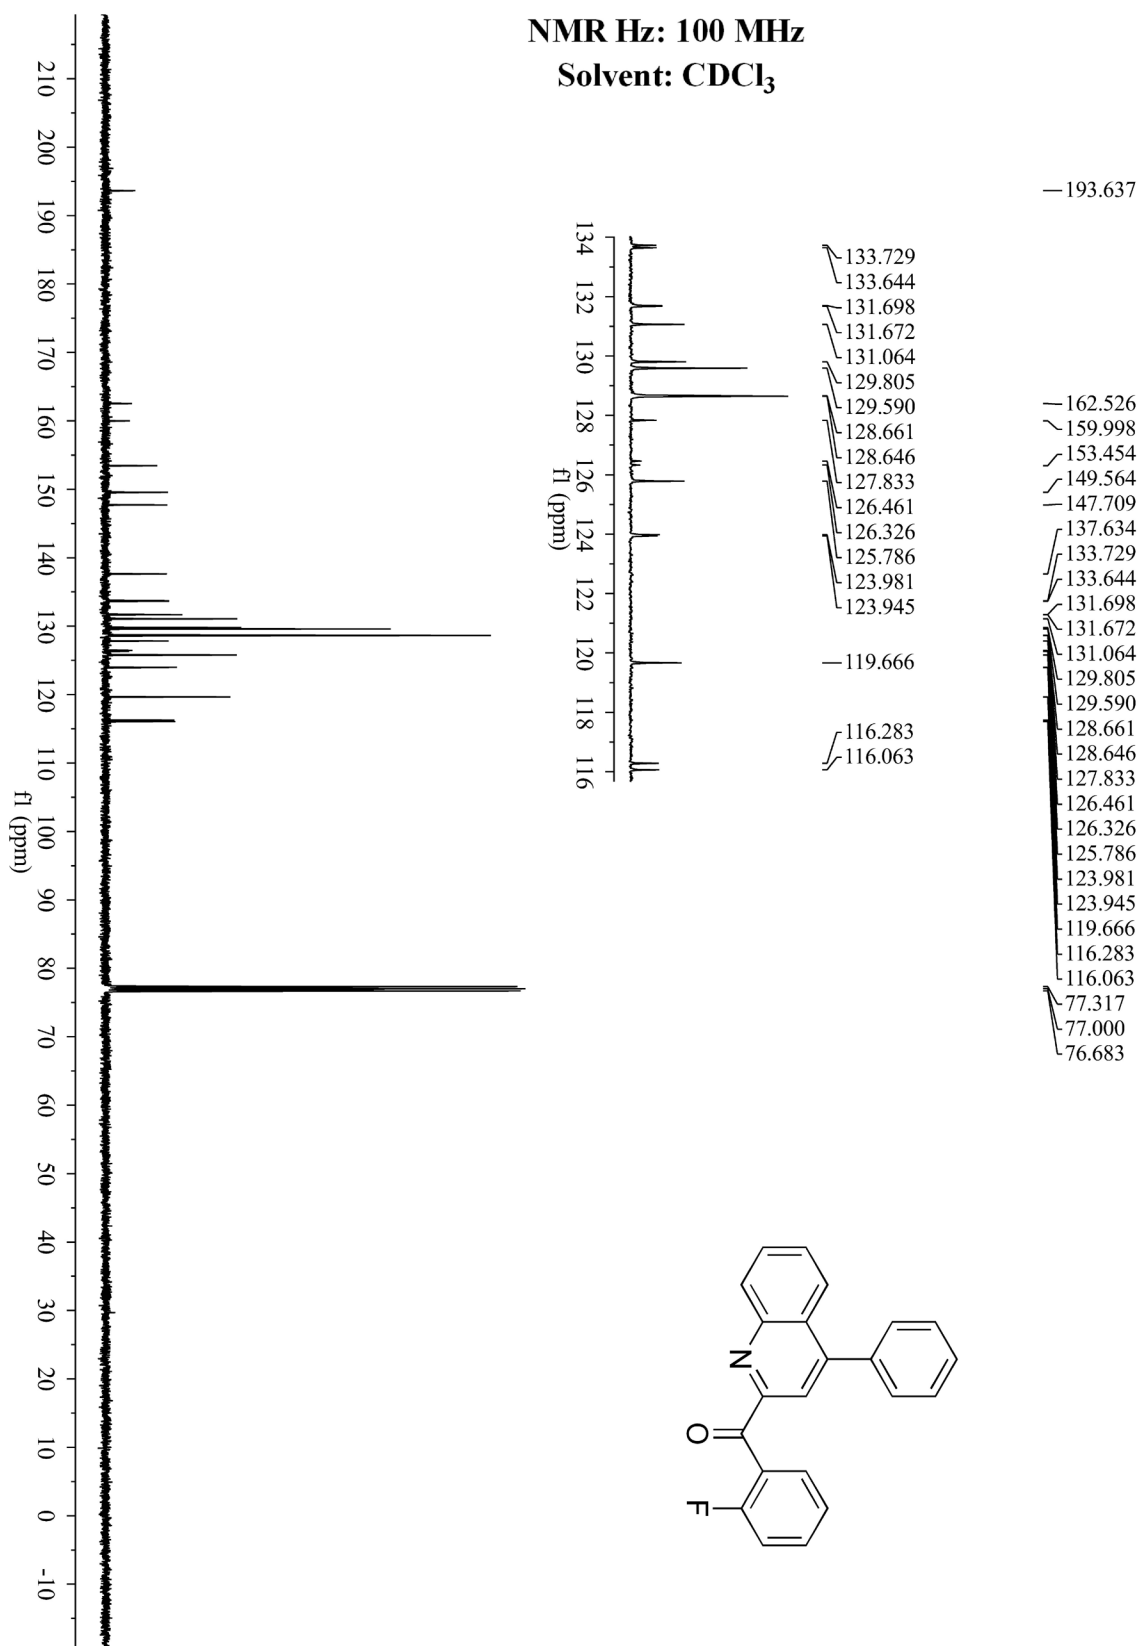

NMR Hz: 282 MHz

Solvent: CDCl<sub>3</sub>

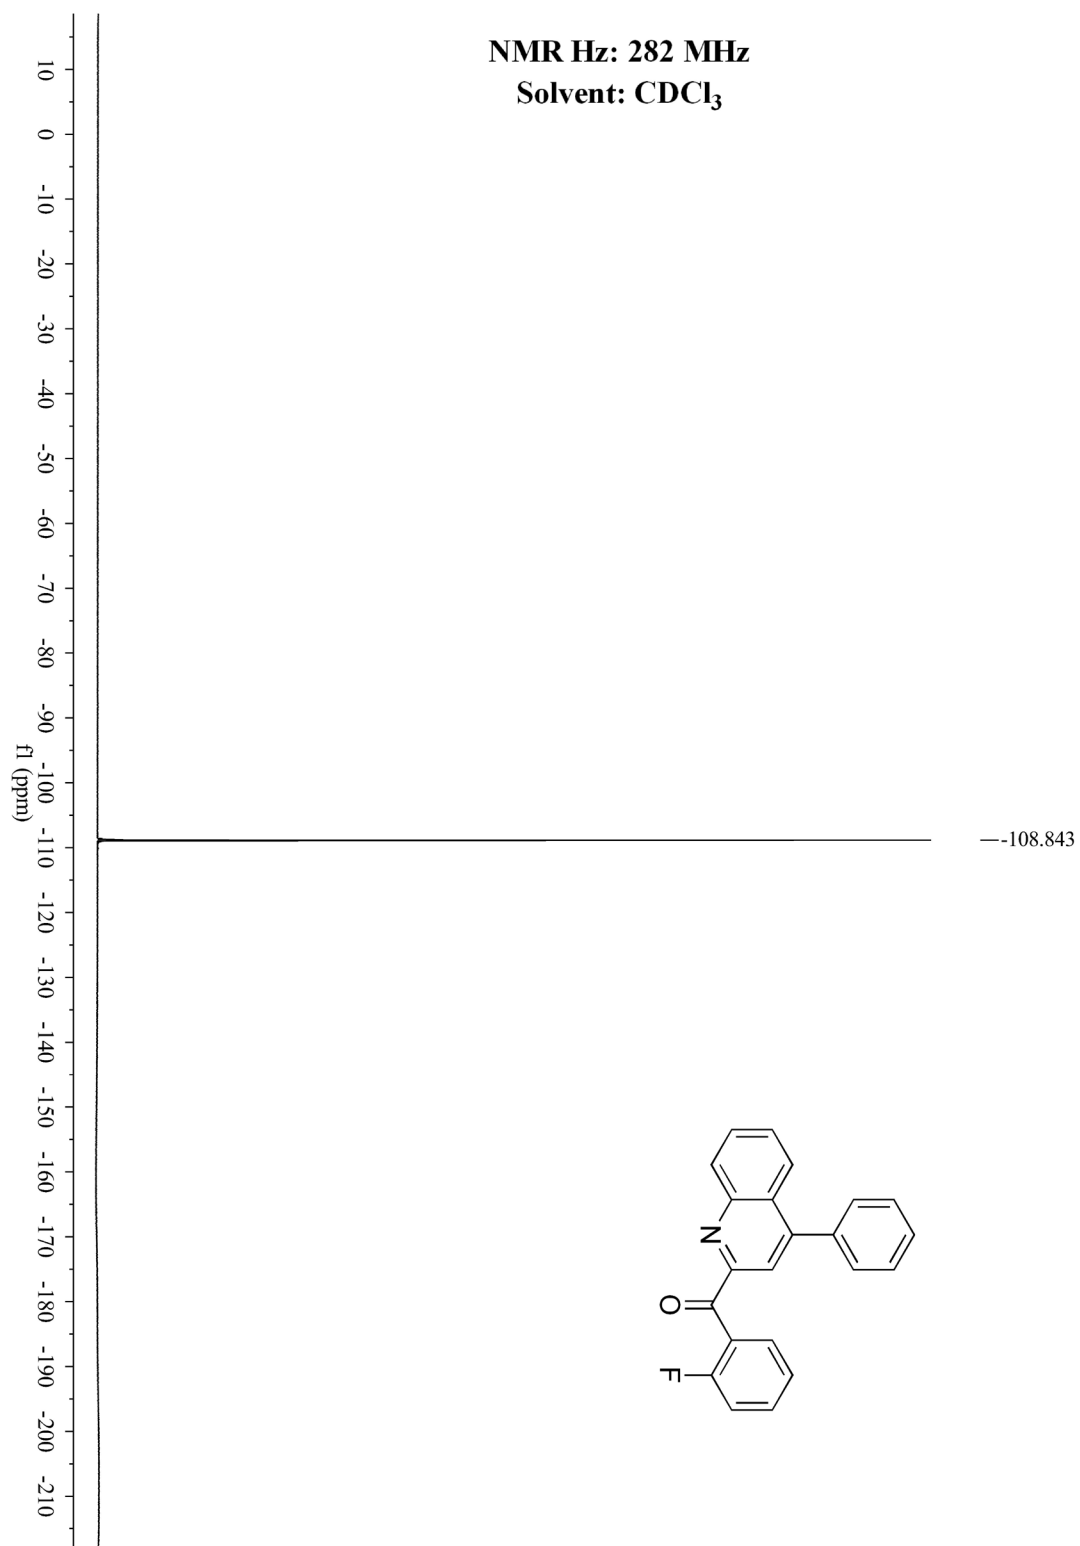

(2-Chlorophenyl)(4-phenylquinolin-2-yl)methanone (3ap)

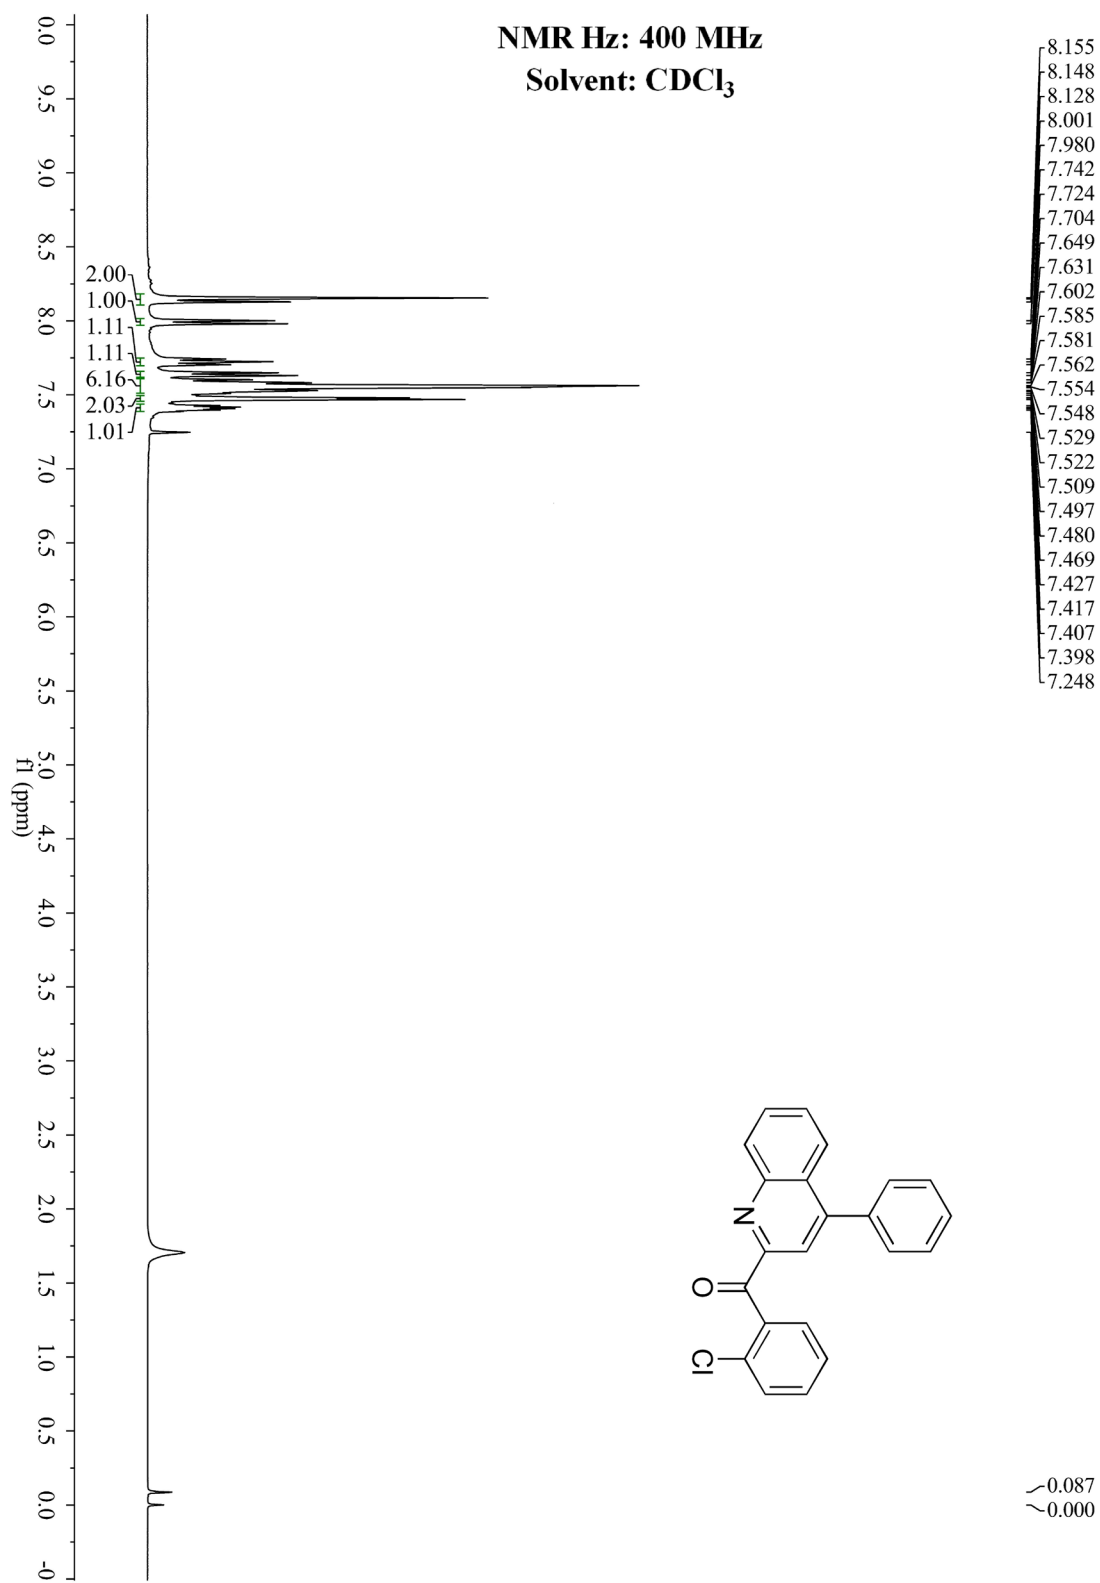

NMR Hz: 100 MHz

Solvent: CDCl<sub>3</sub>

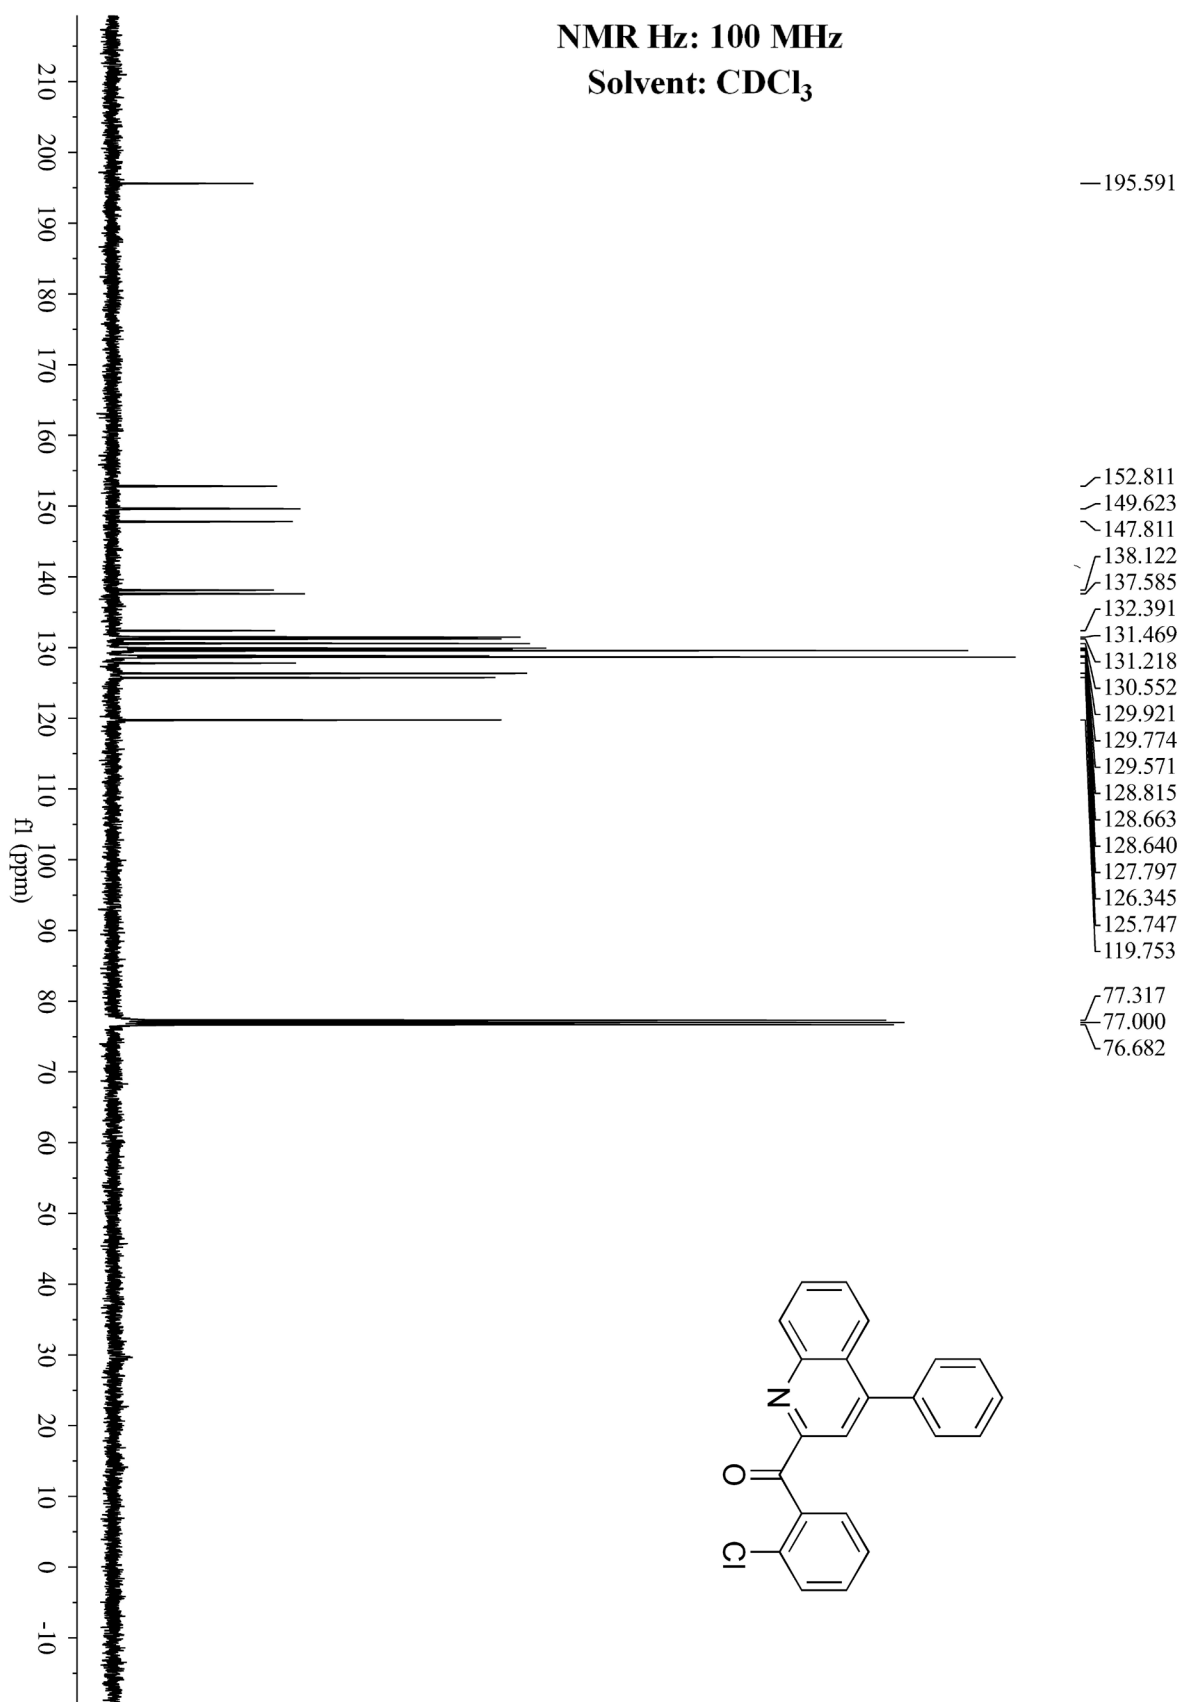



(2-Bromophenyl)(4-phenylquinolin-2-yl)methanone(3aq)

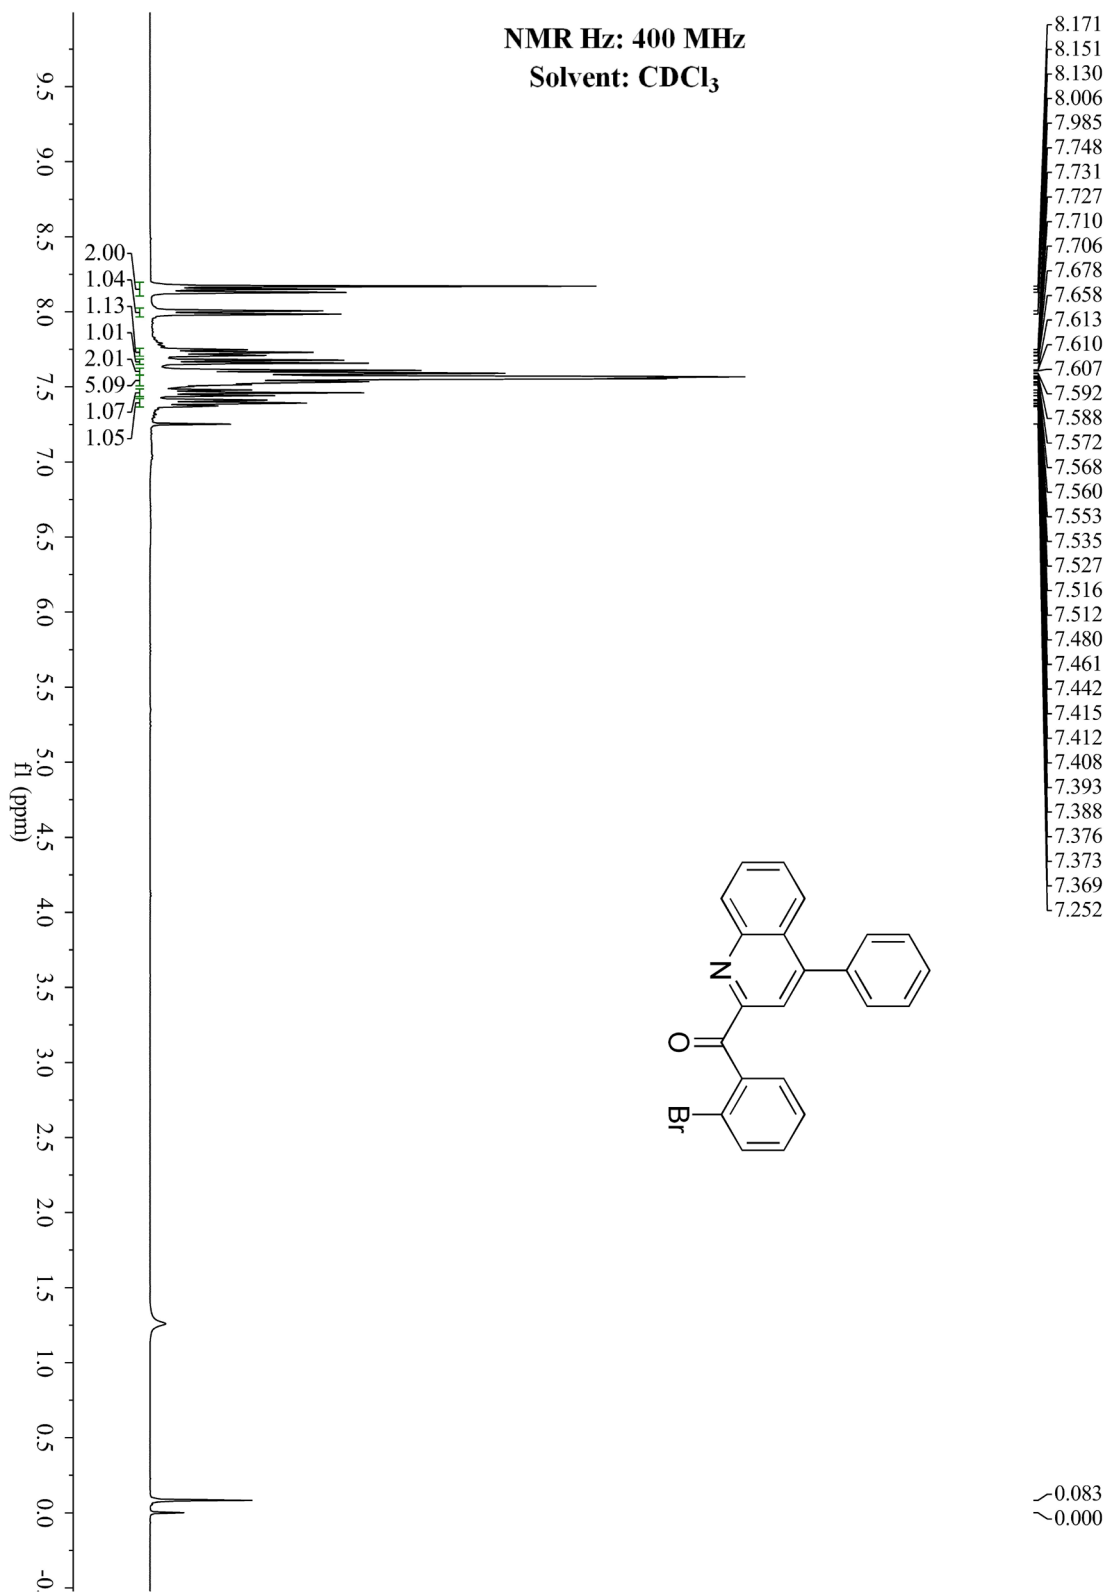

NMR Hz: 100 MHz  
Solvent: CDCl<sub>3</sub>

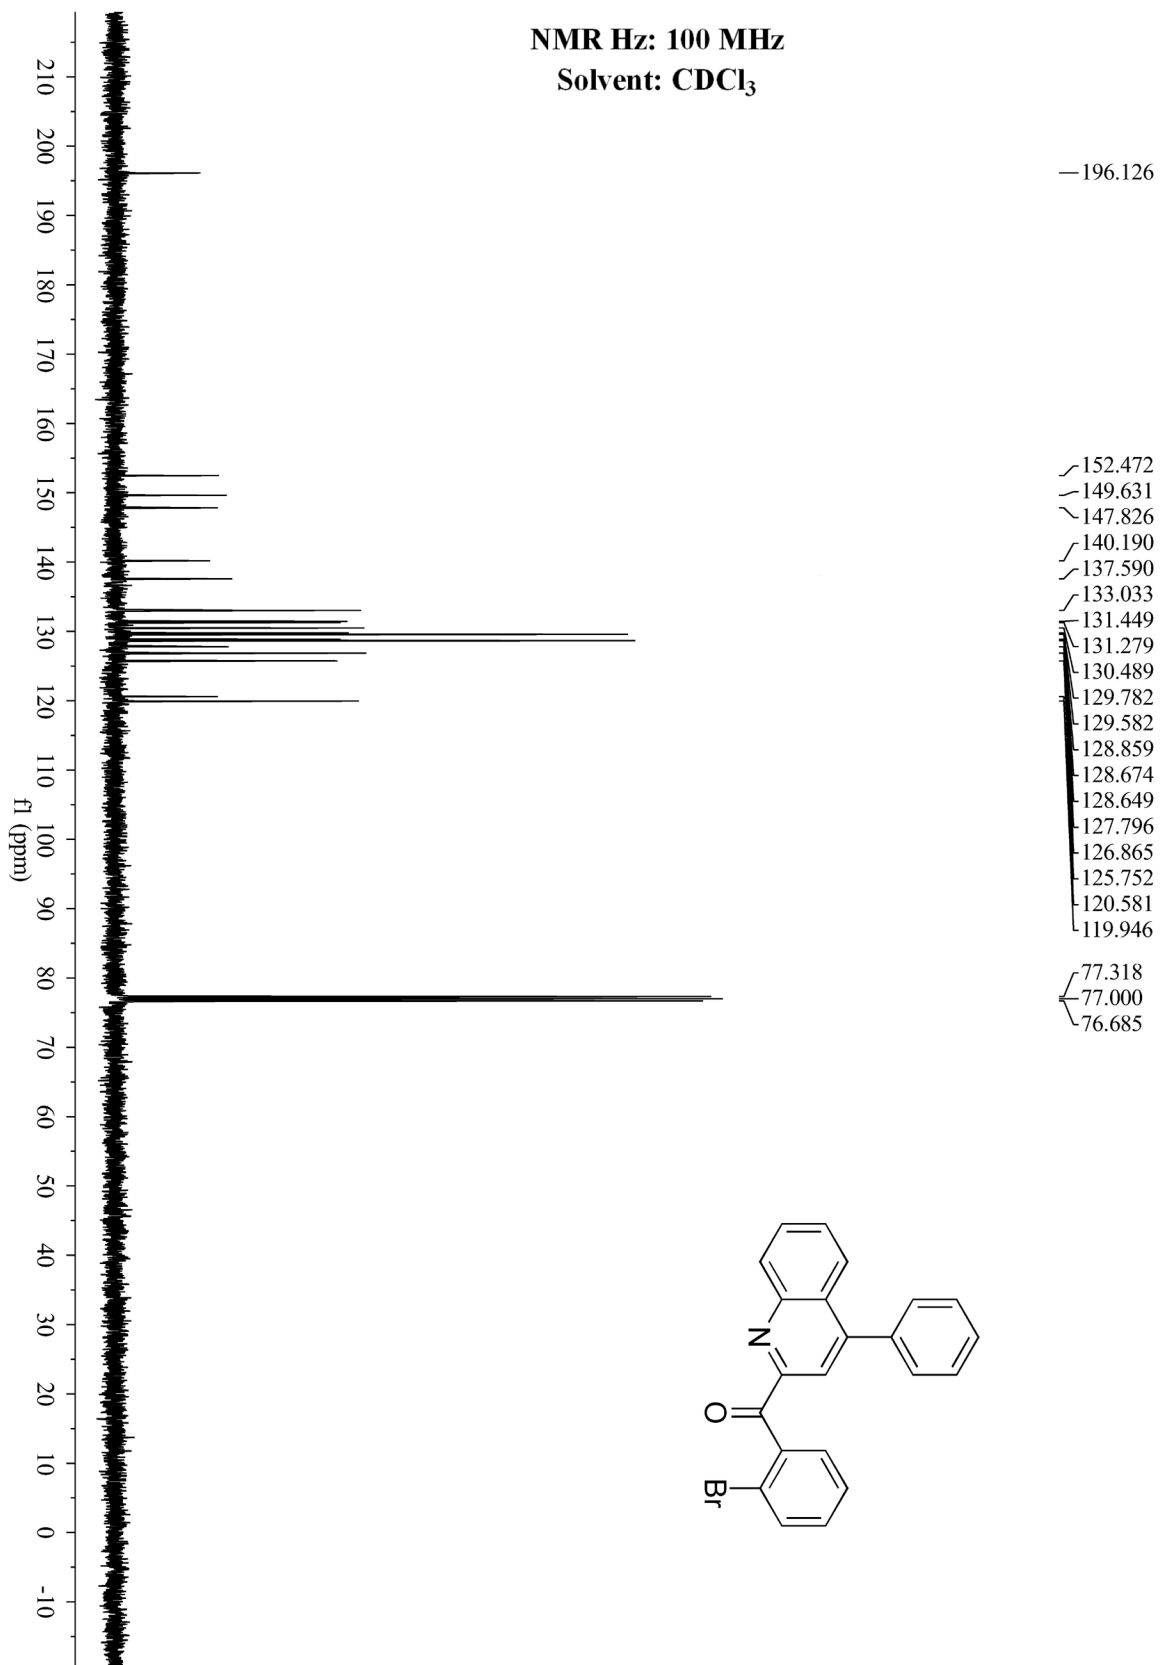

(3,5-Dichlorophenyl)(4-phenylquinolin-2-yl)methanone(3ar)

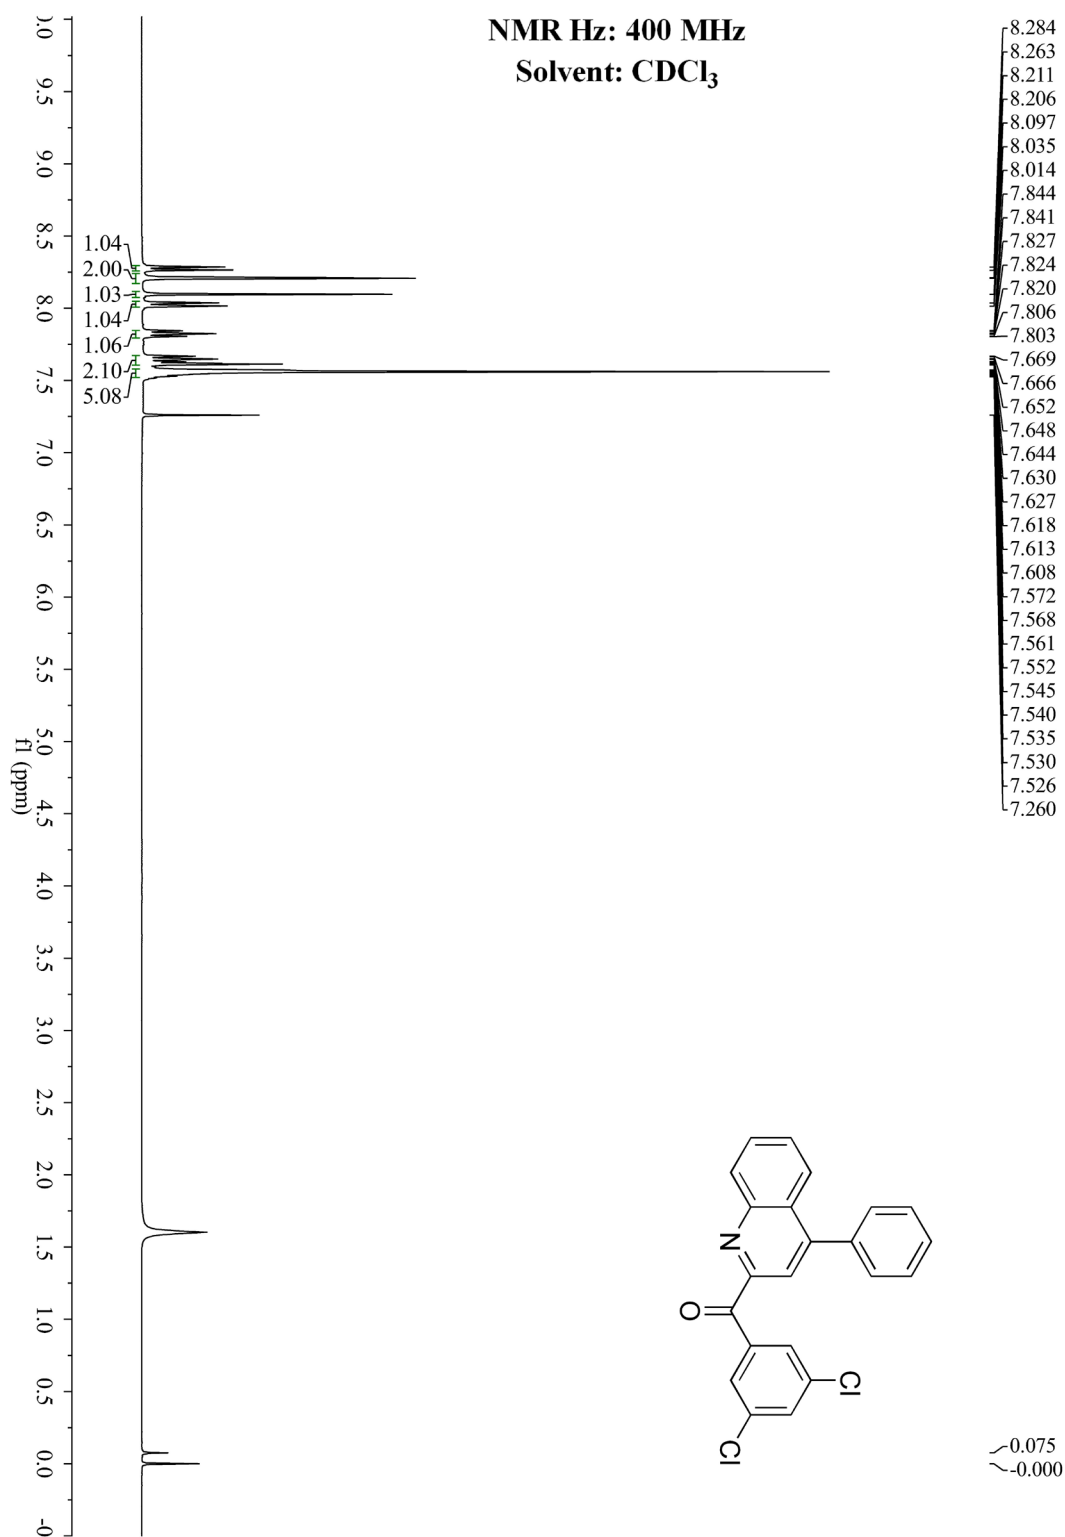

NMR Hz: 100 MHz  
Solvent: CDCl<sub>3</sub>

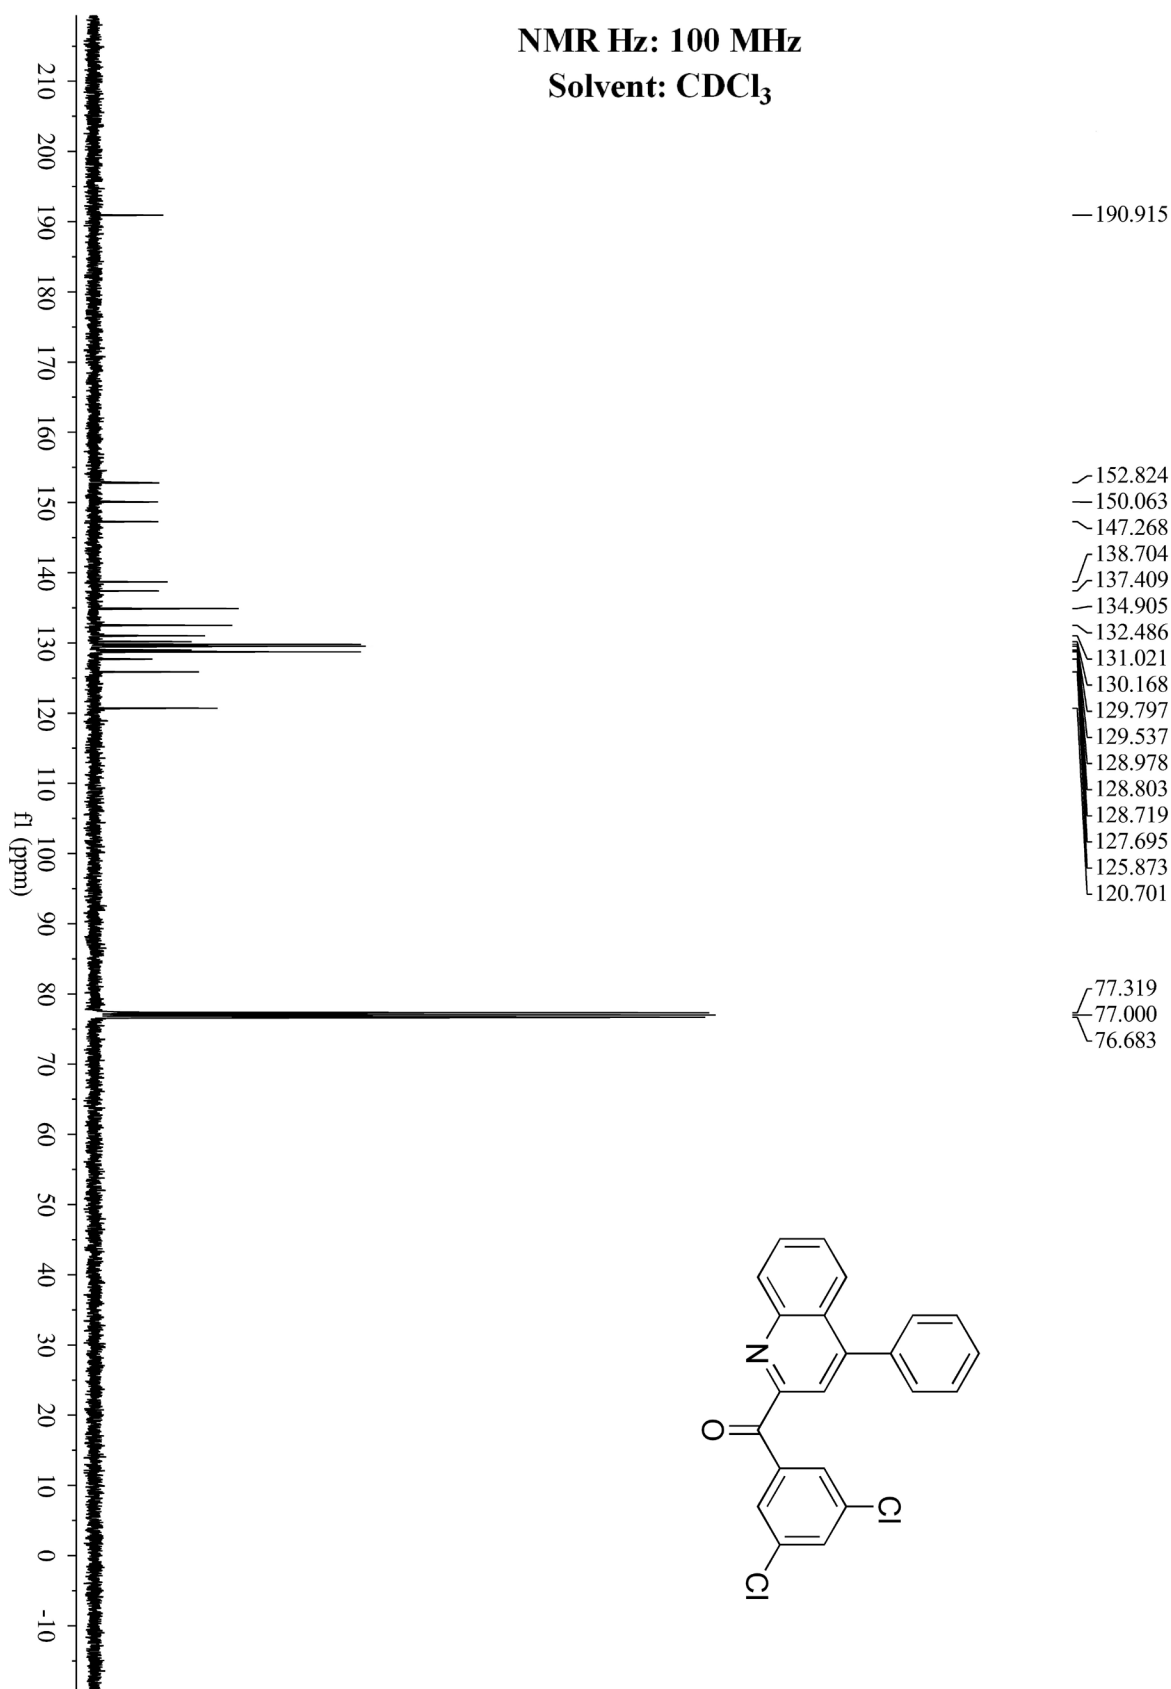

(4-Phenylquinolin-2-yl)(thiophen-2-yl)methanone(3as)

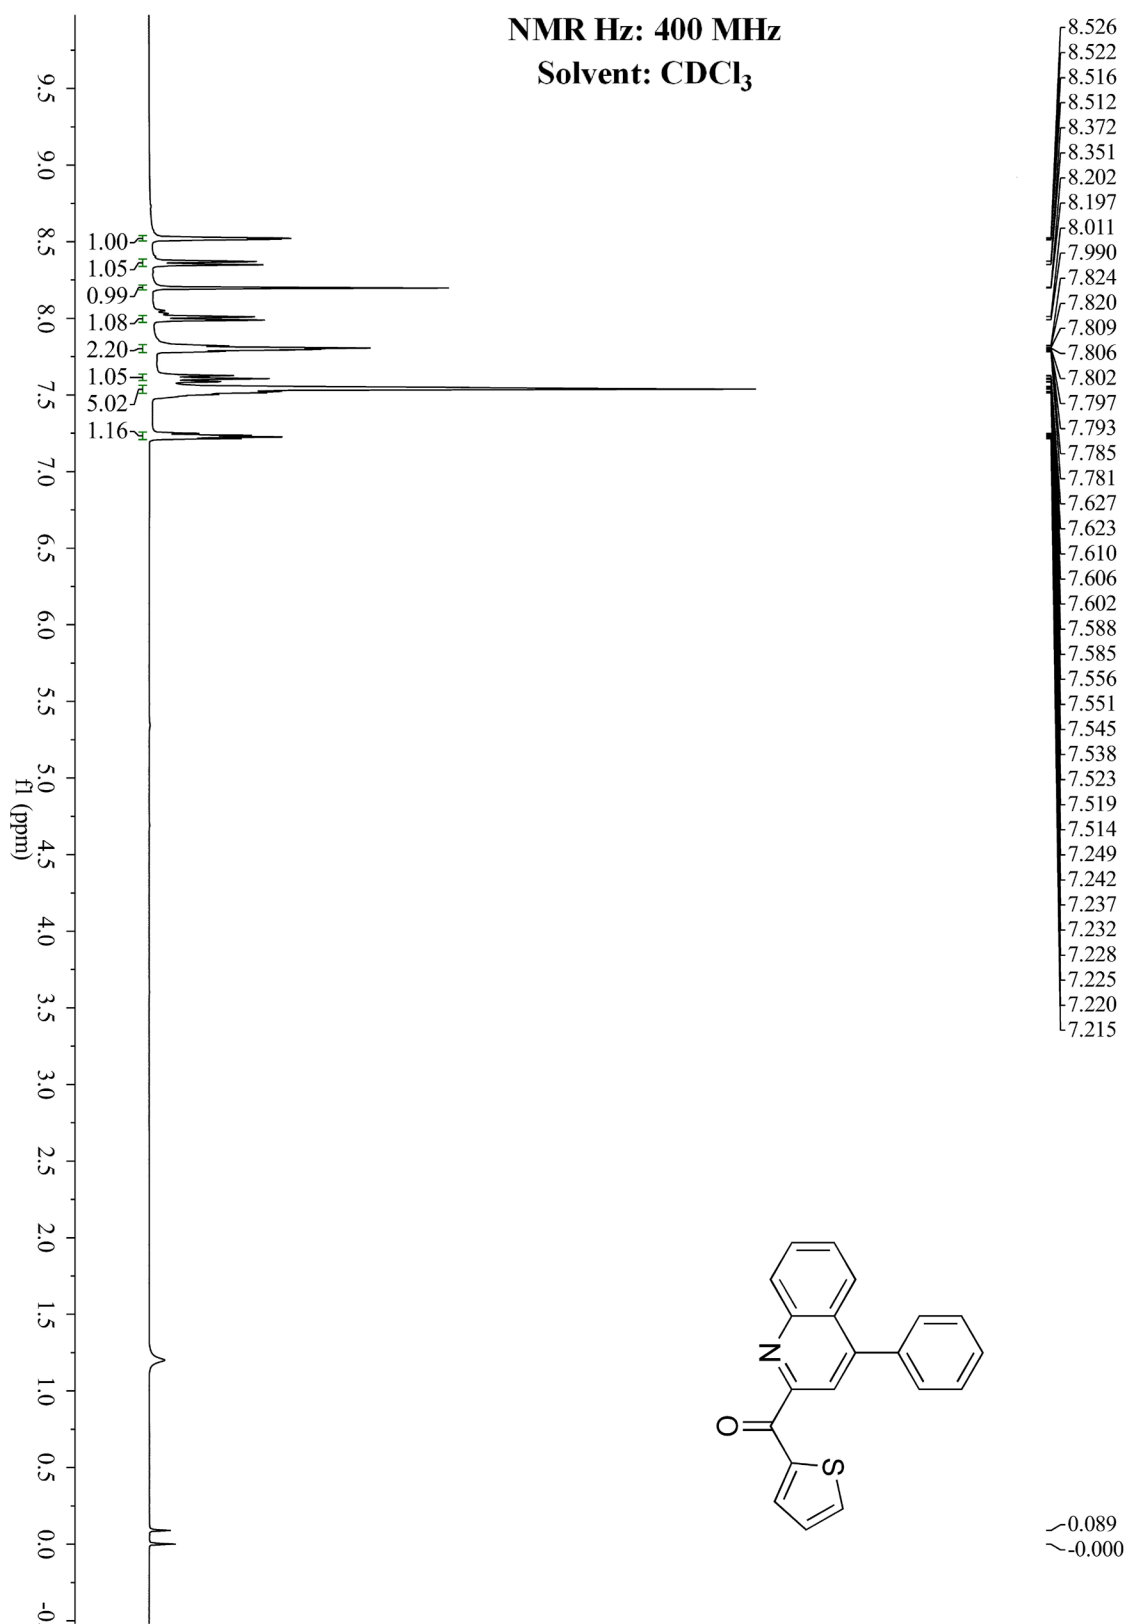

NMR Hz: 100 MHz  
Solvent: CDCl<sub>3</sub>

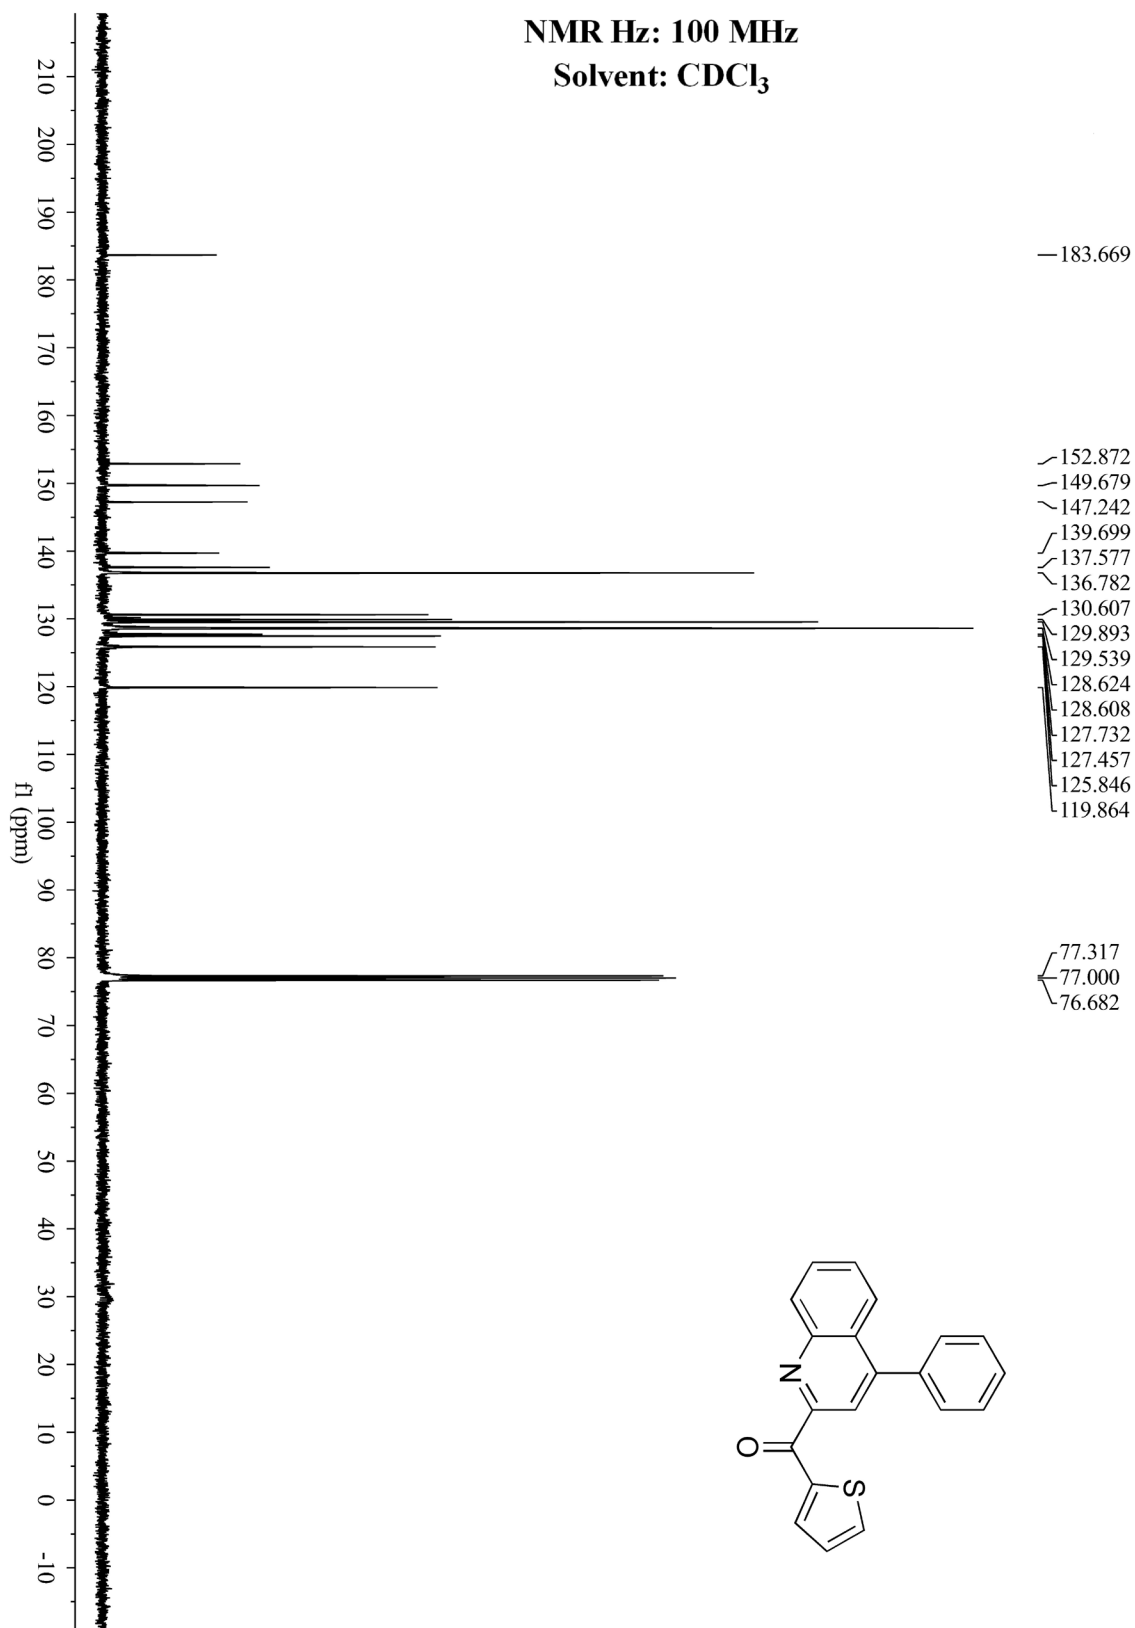

(6-Methyl-4-phenylquinolin-2-yl)(phenyl)methanone (3ba)

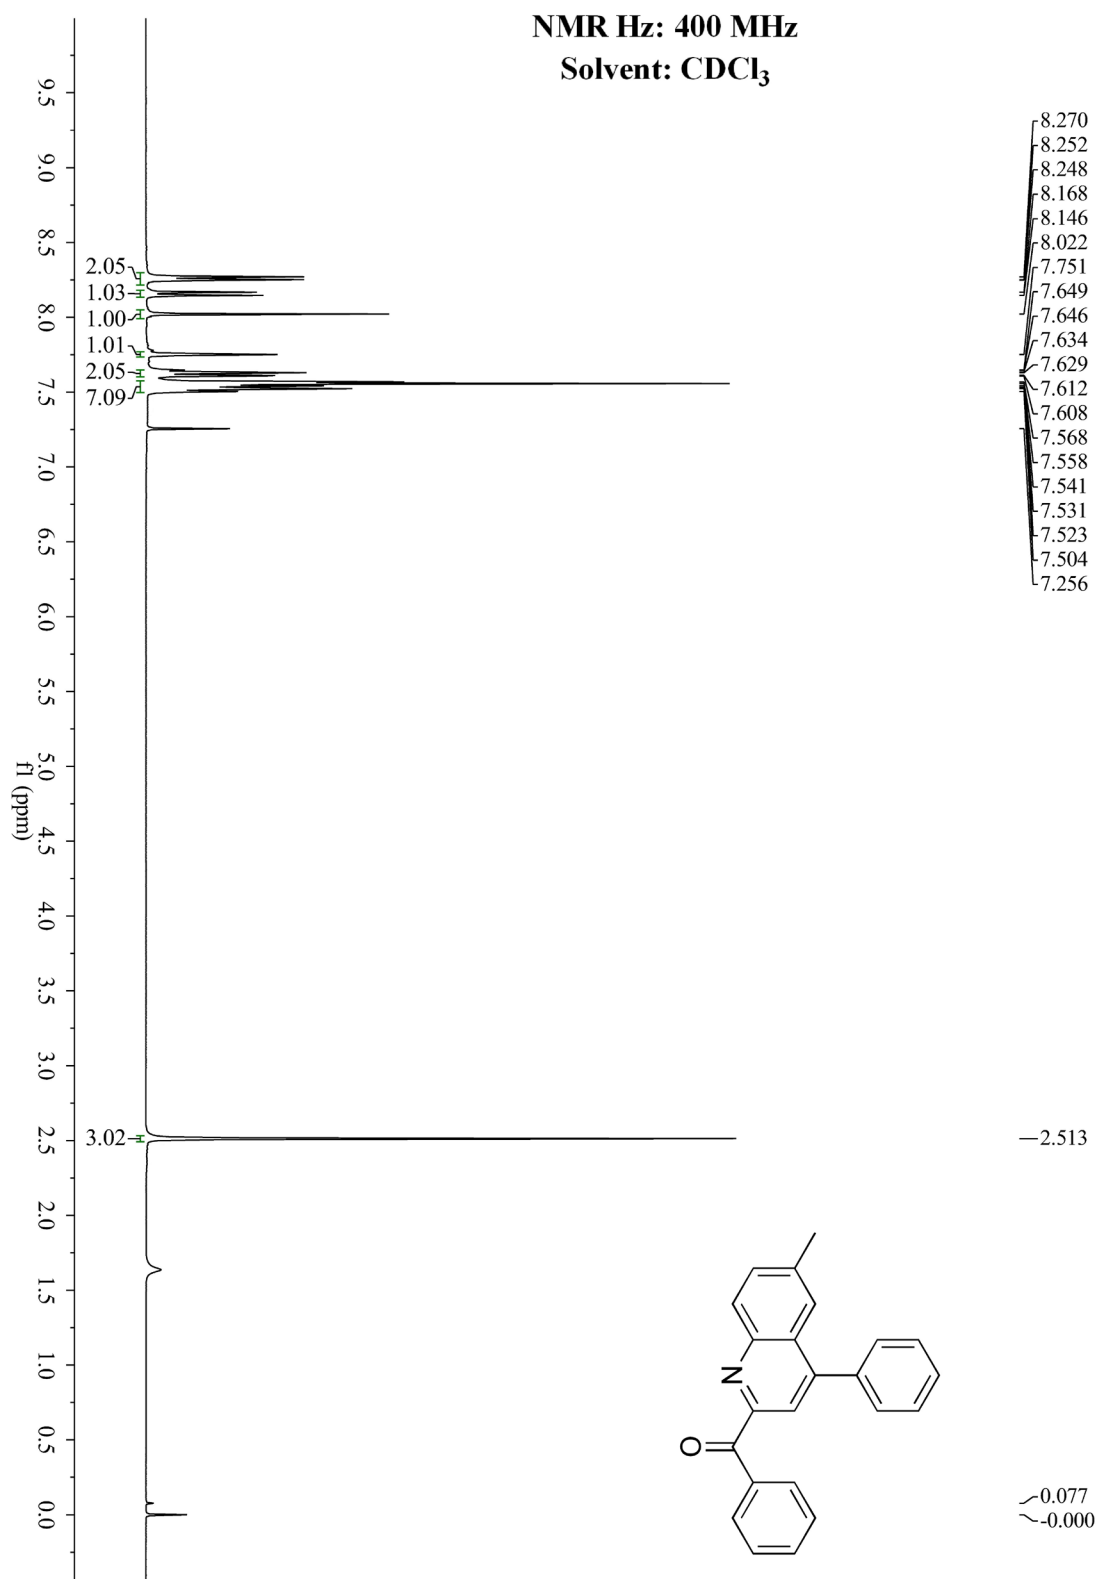

NMR Hz: 100 MHz

Solvent: CDCl<sub>3</sub>

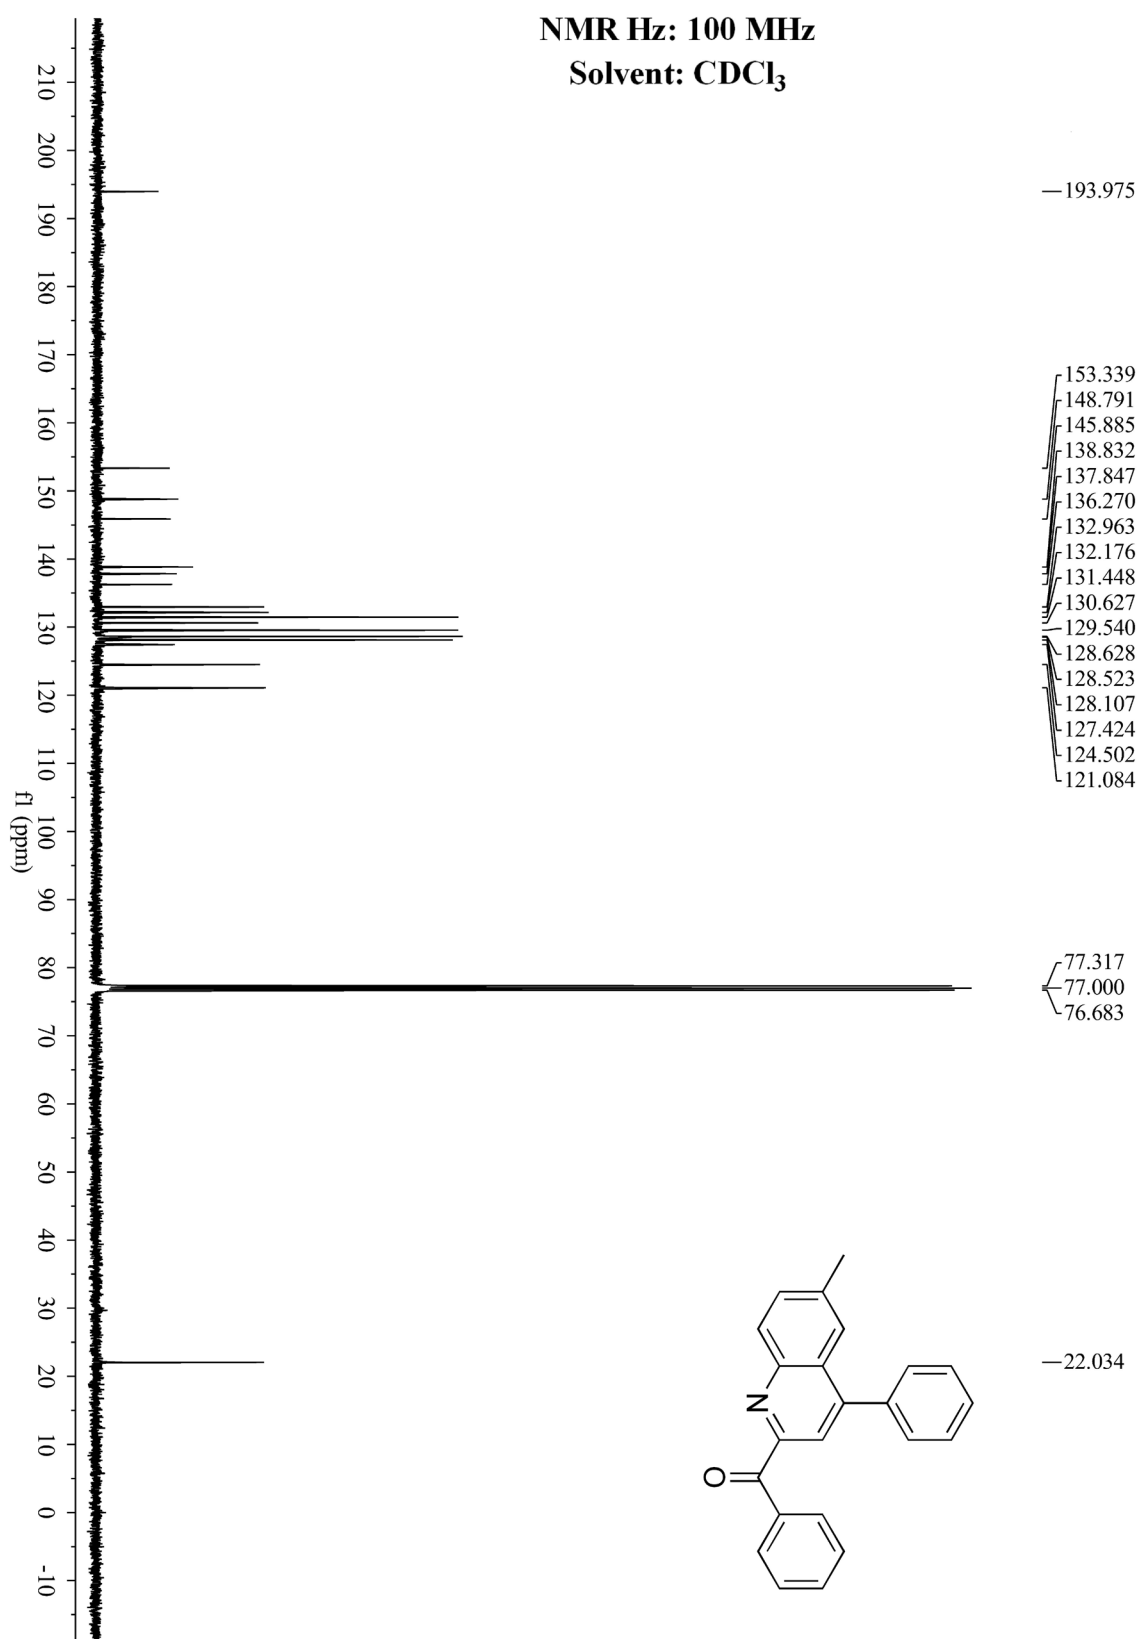



(6-Ethyl-4-phenylquinolin-2-yl)(phenyl)methanone (3ca)

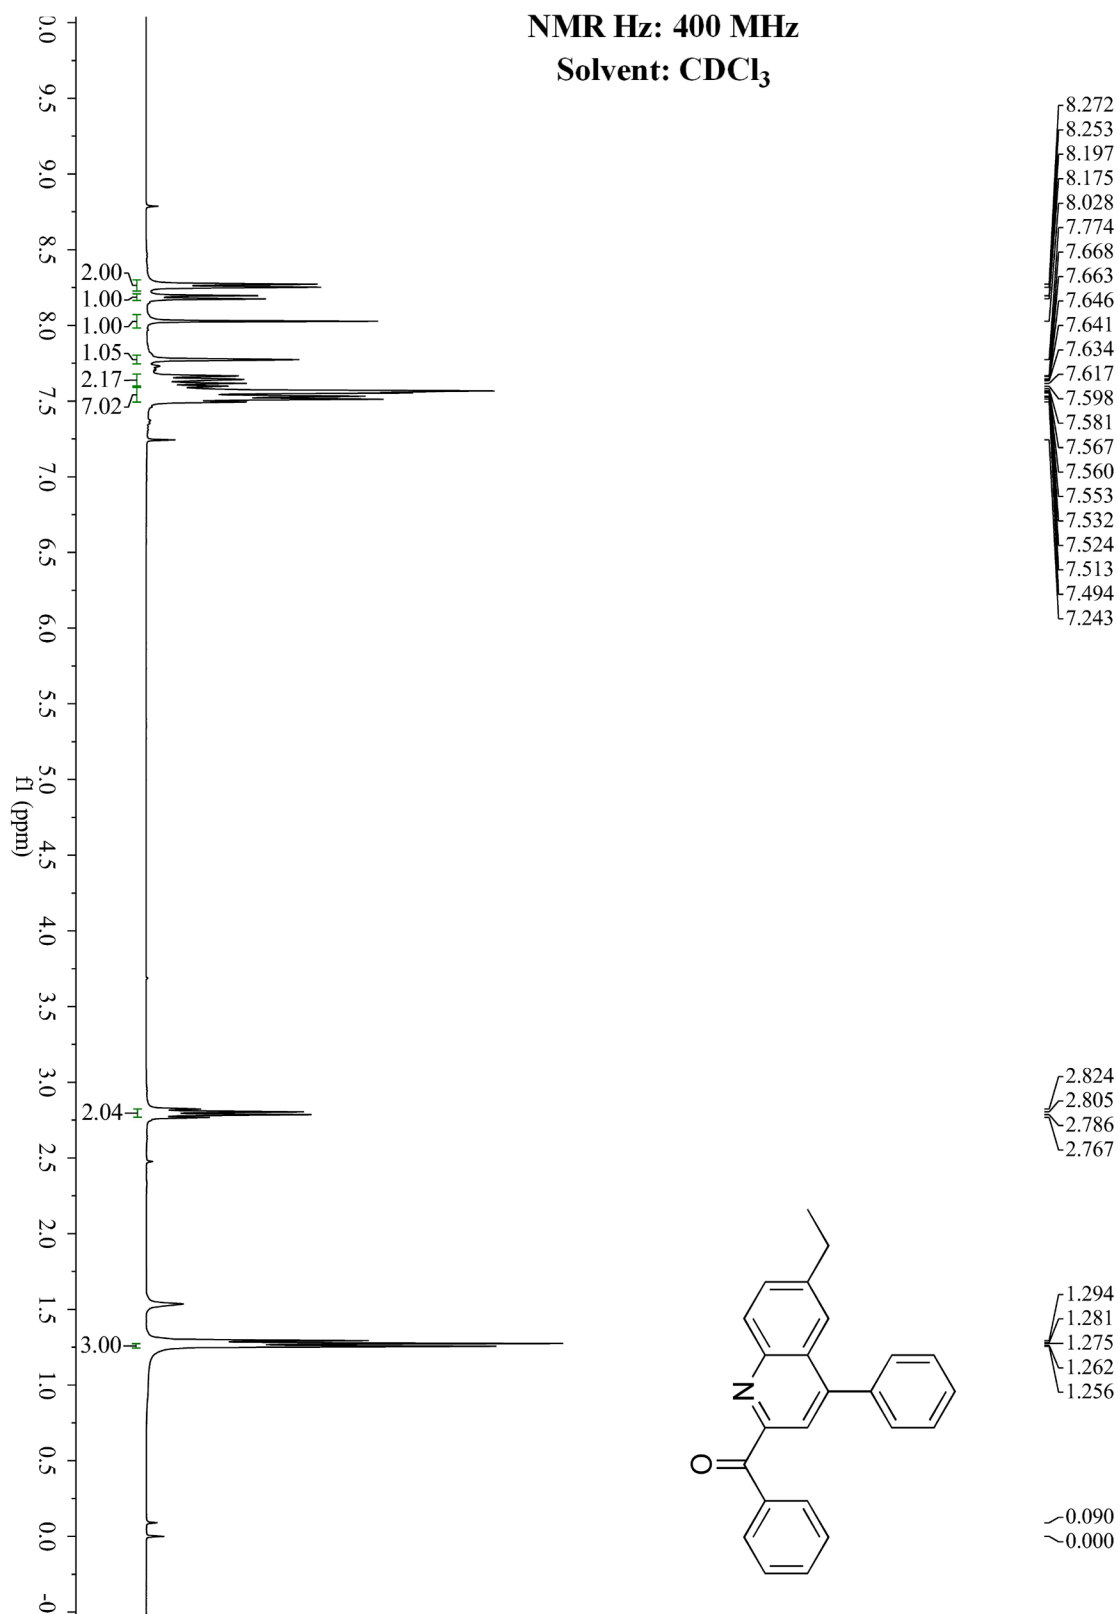

NMR Hz: 100 MHz  
Solvent: CDCl<sub>3</sub>

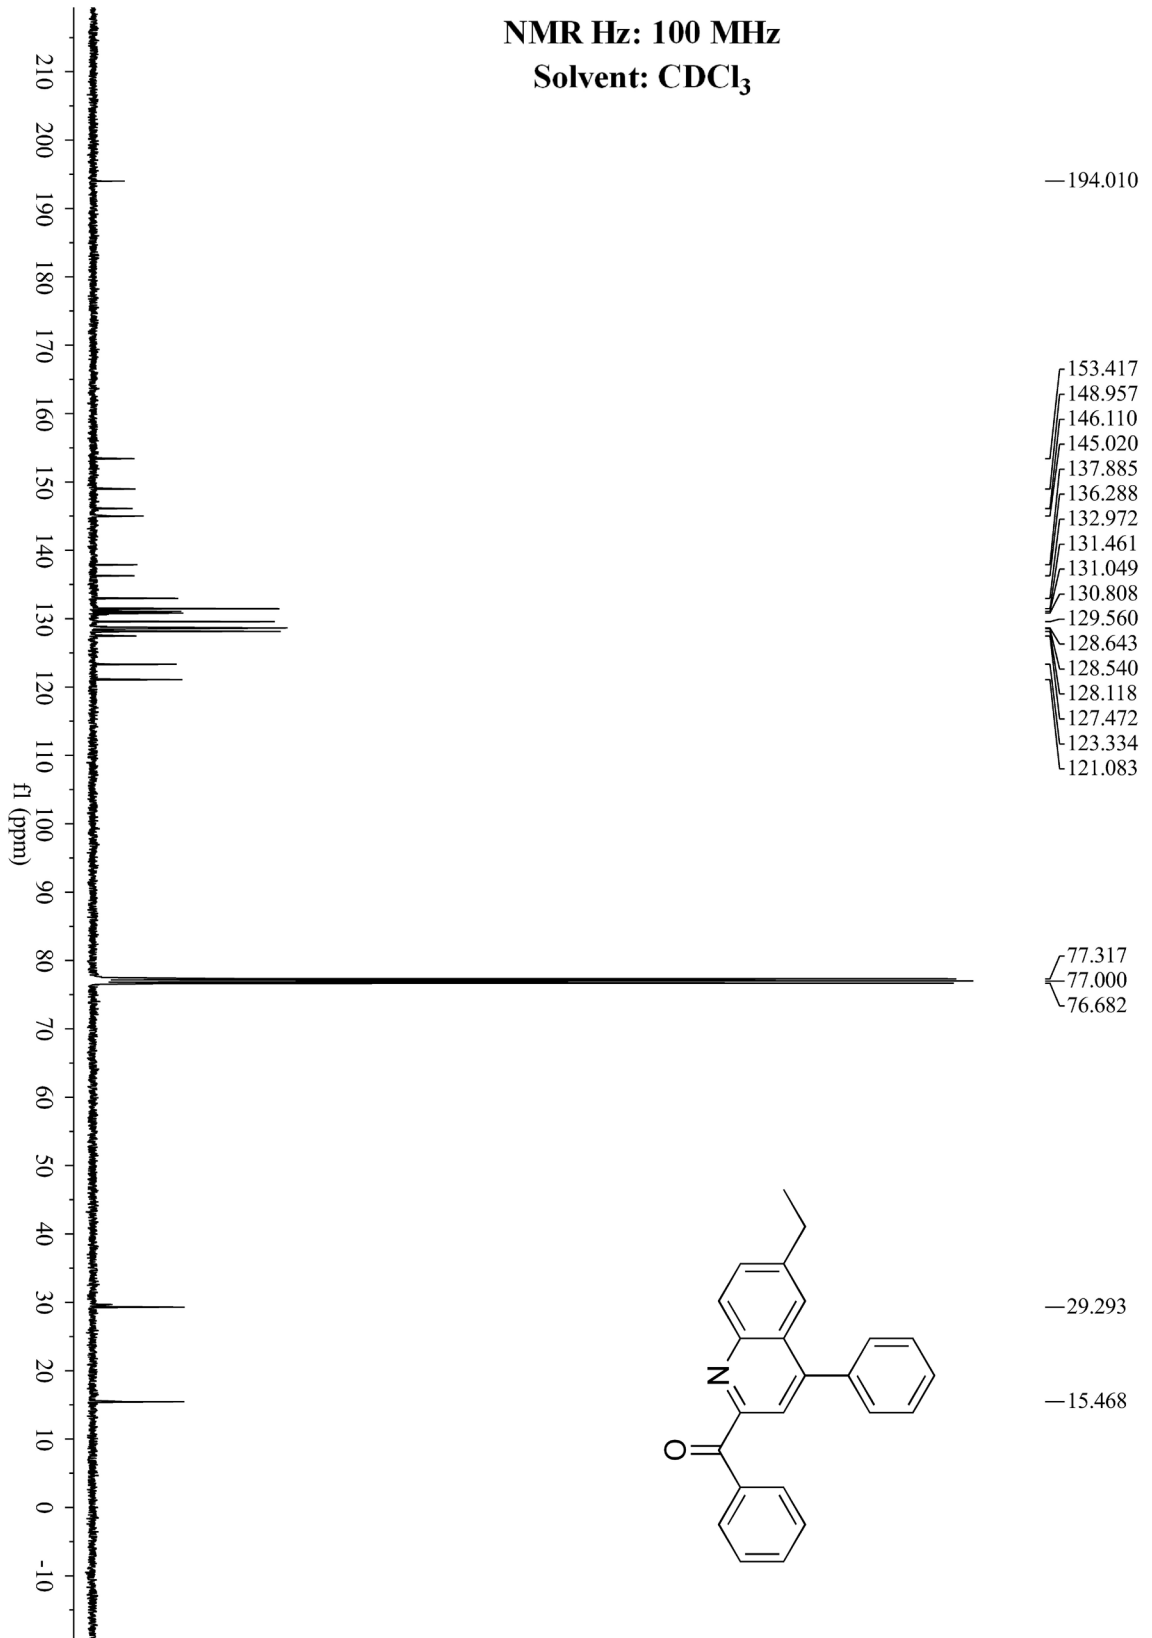

(6-(Tert-butyl)-4-phenylquinolin-2-yl)(phenyl)methanone(3da)

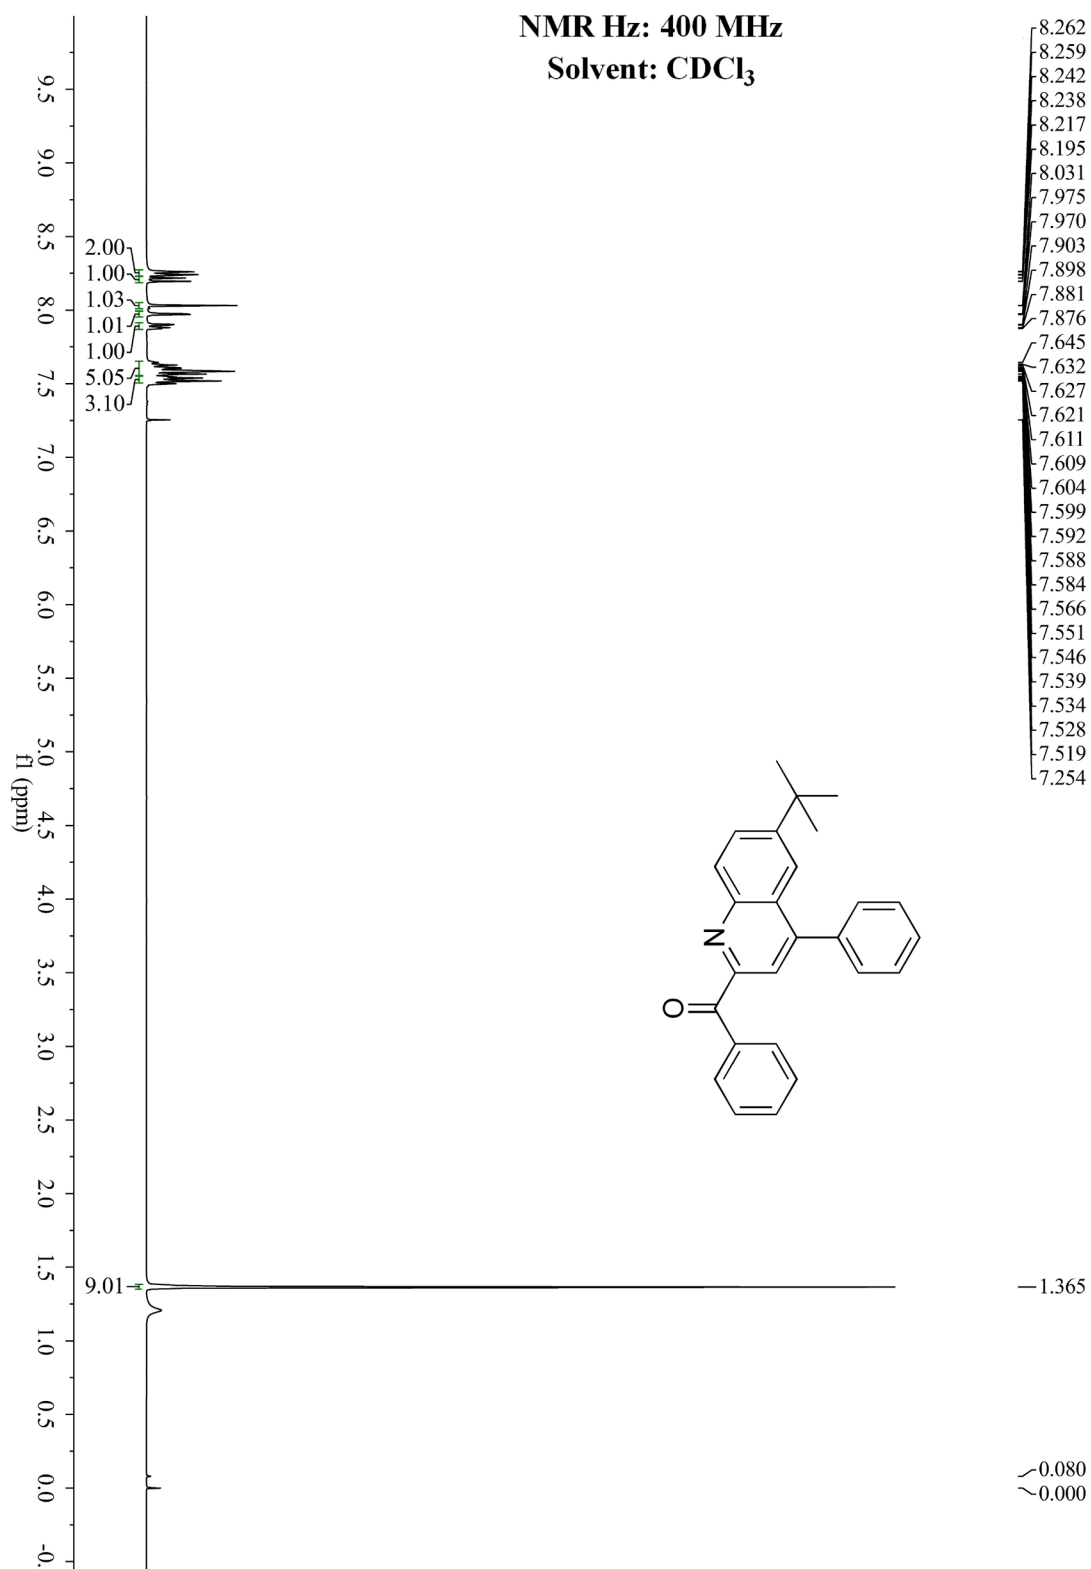

NMR Hz: 100 MHz  
Solvent: CDCl<sub>3</sub>

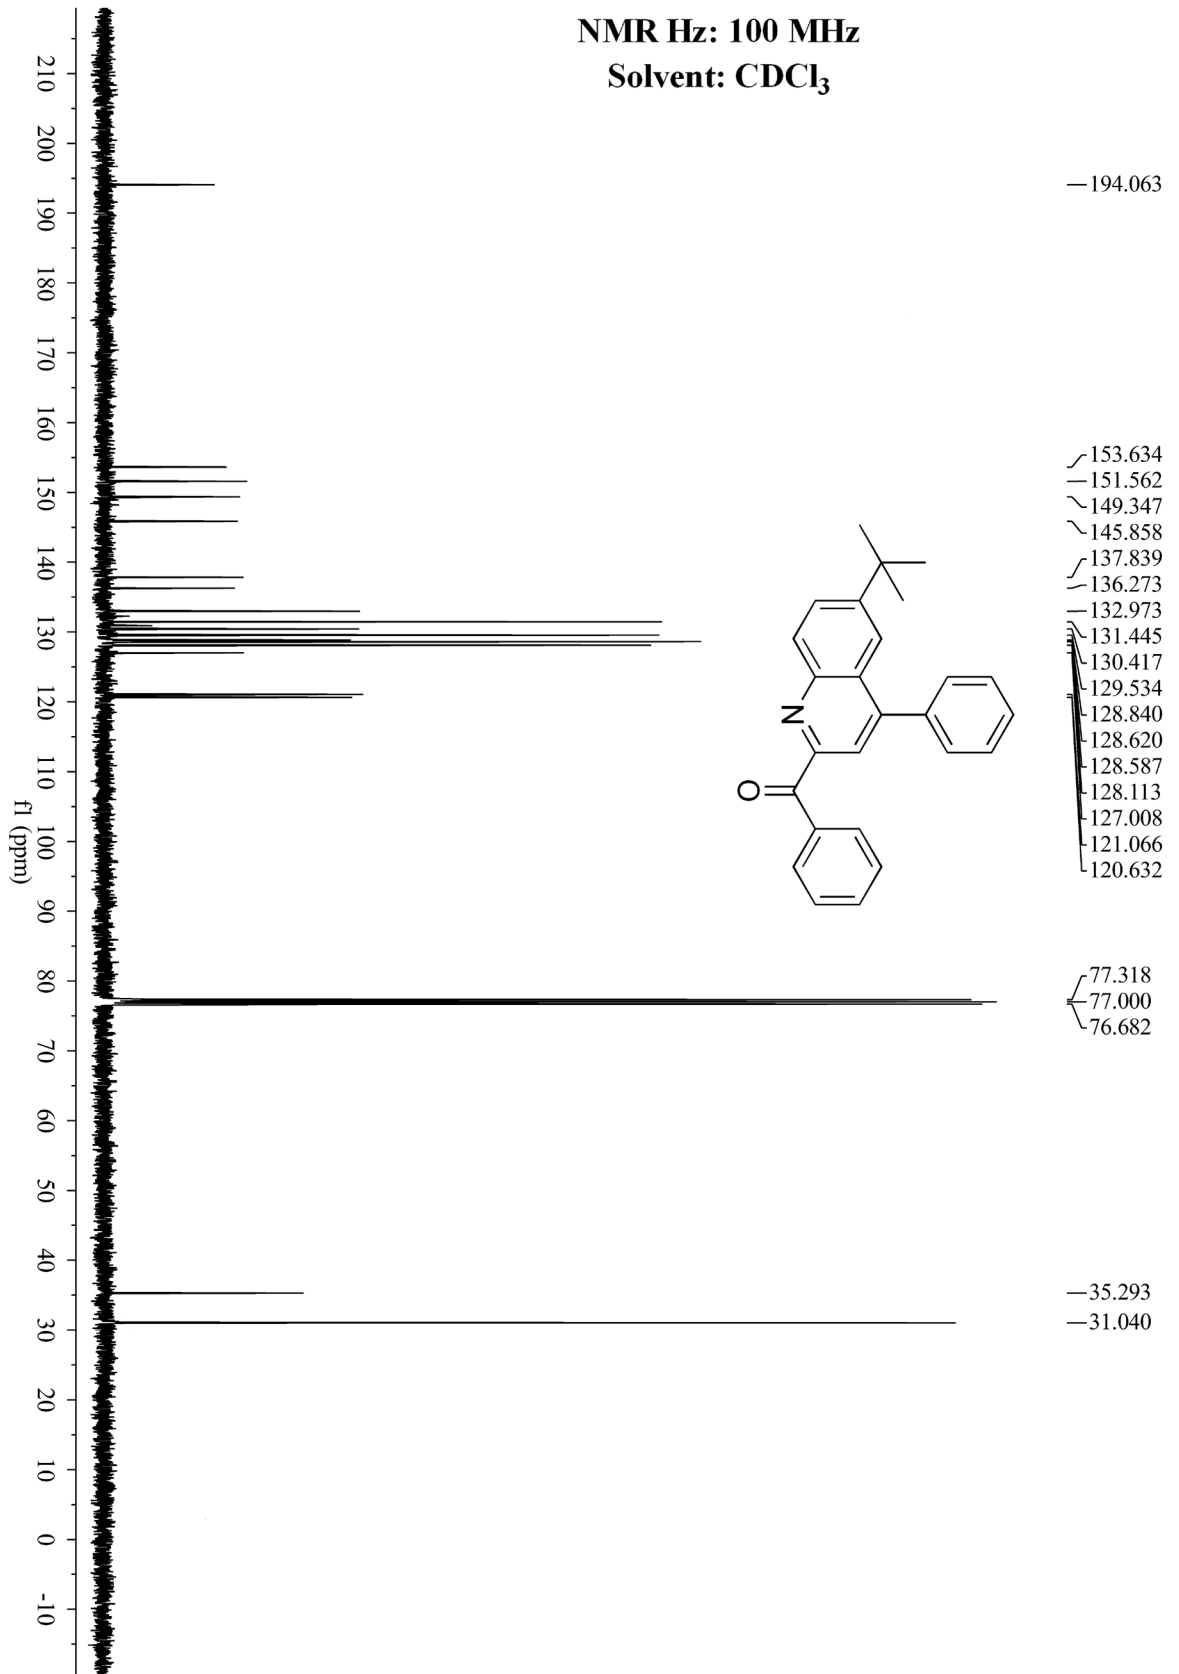

(6-Isopropyl-4-phenylquinolin-2-yl)(phenyl)methanone(3ea)

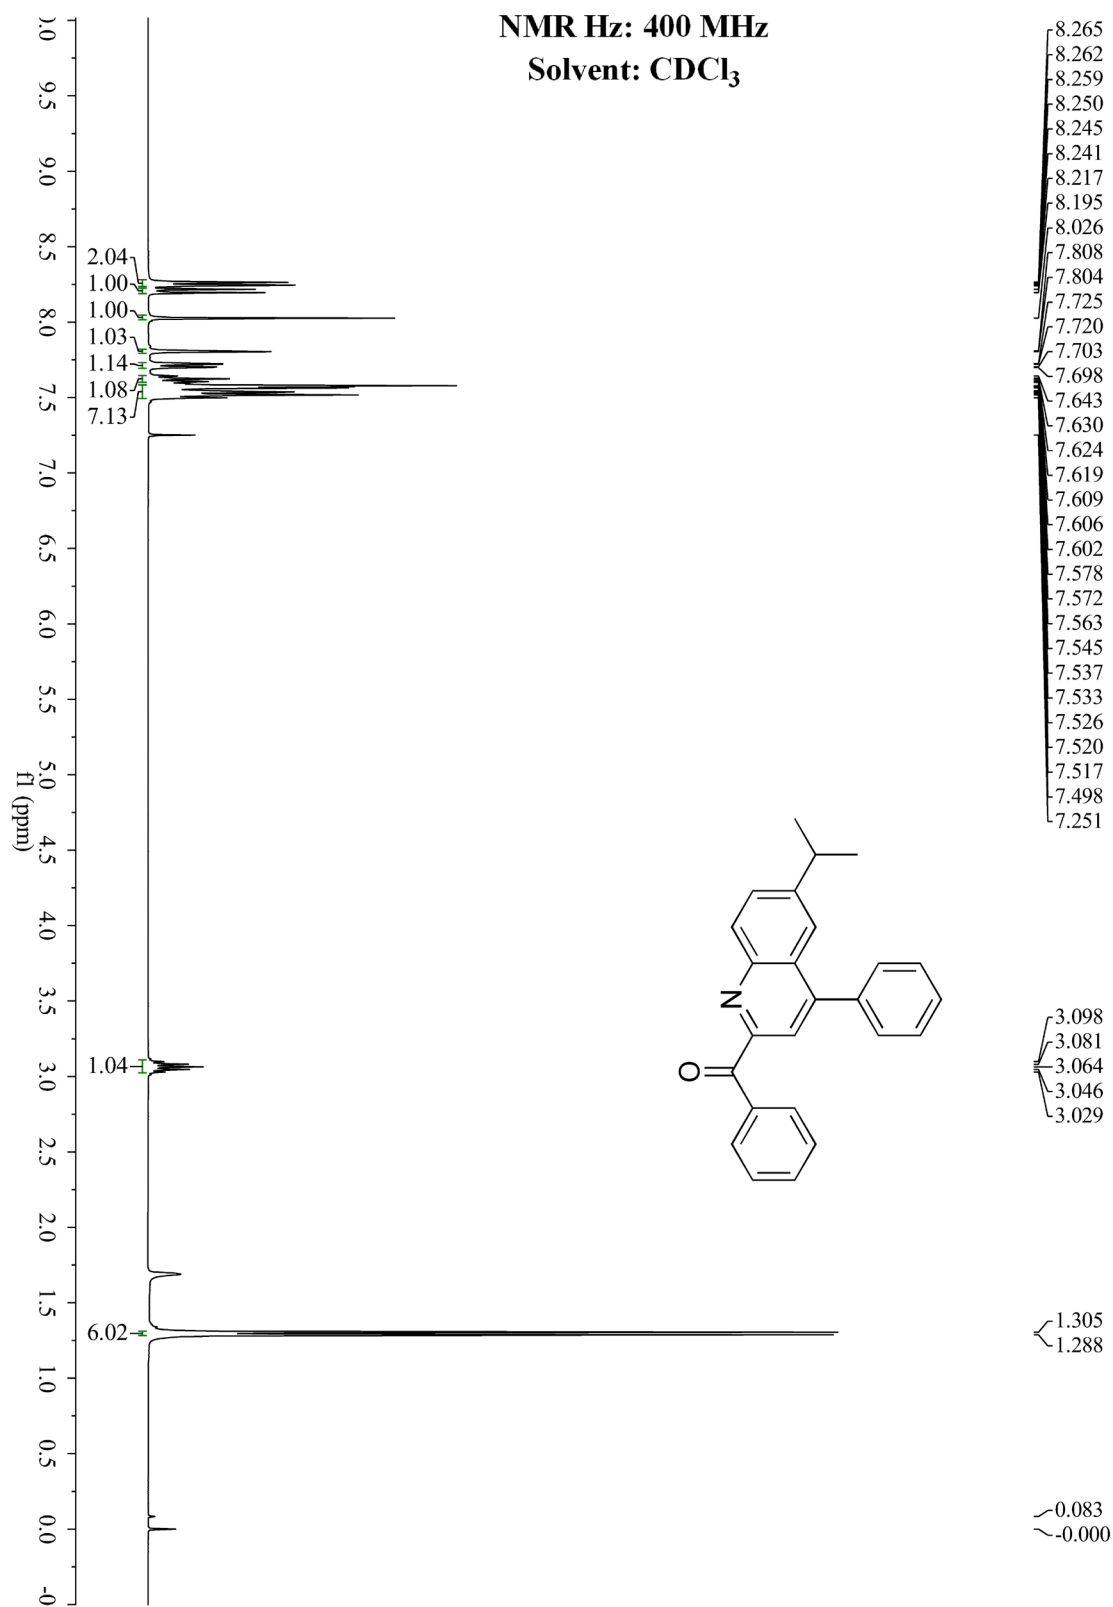

NMR Hz: 100 MHz  
Solvent: CDCl<sub>3</sub>

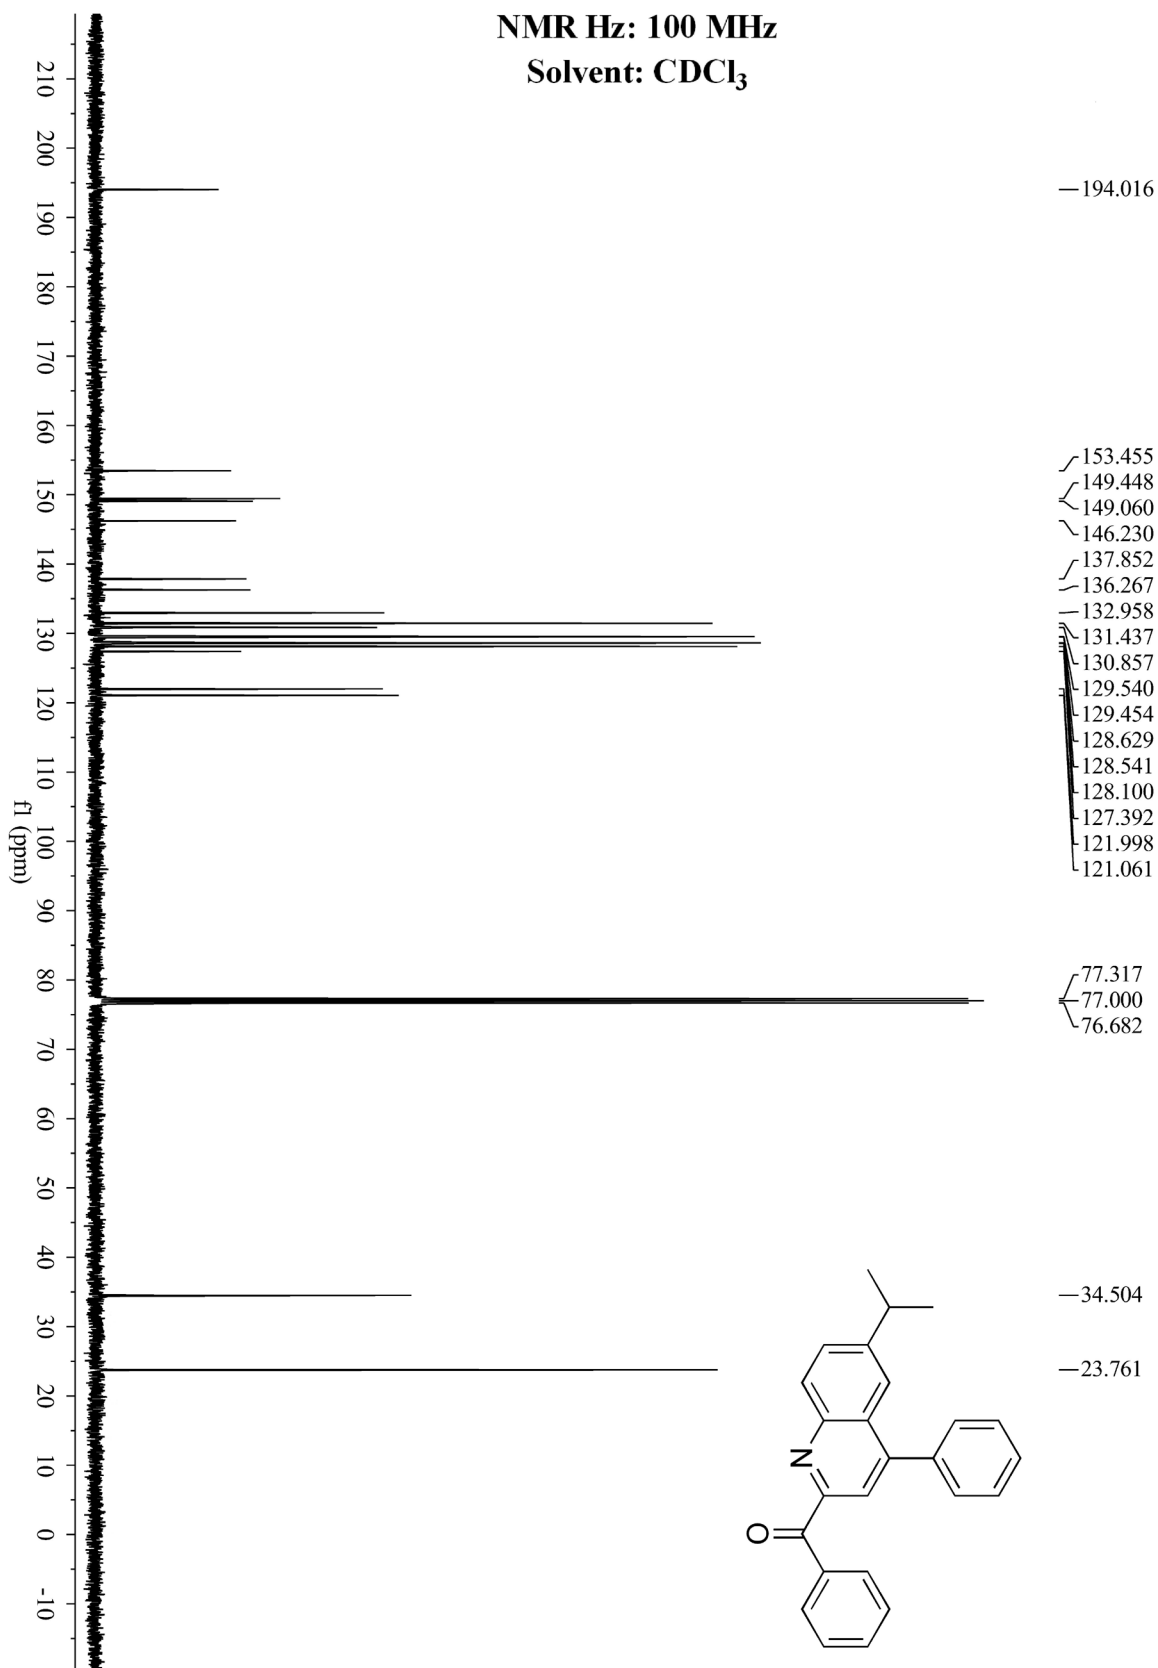

(6-Methoxy-4-phenylquinolin-2-yl)(phenyl)methanone(3fa)

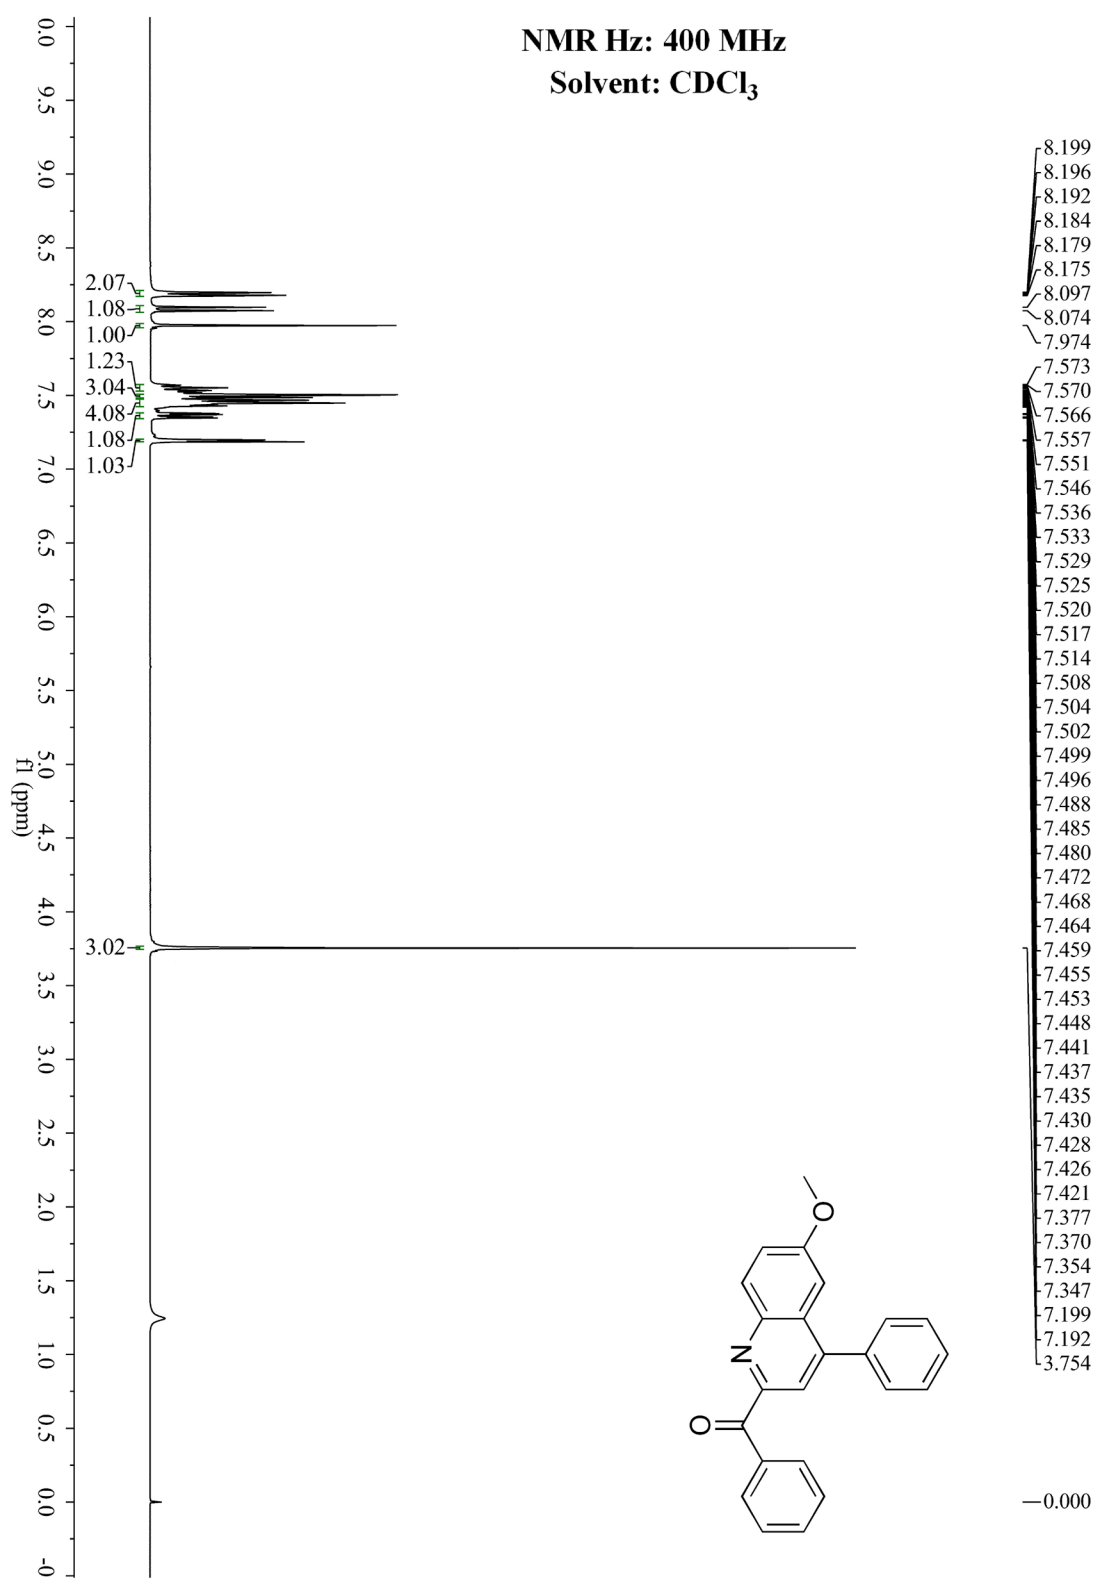

NMR Hz: 100 MHz  
Solvent: CDCl<sub>3</sub>

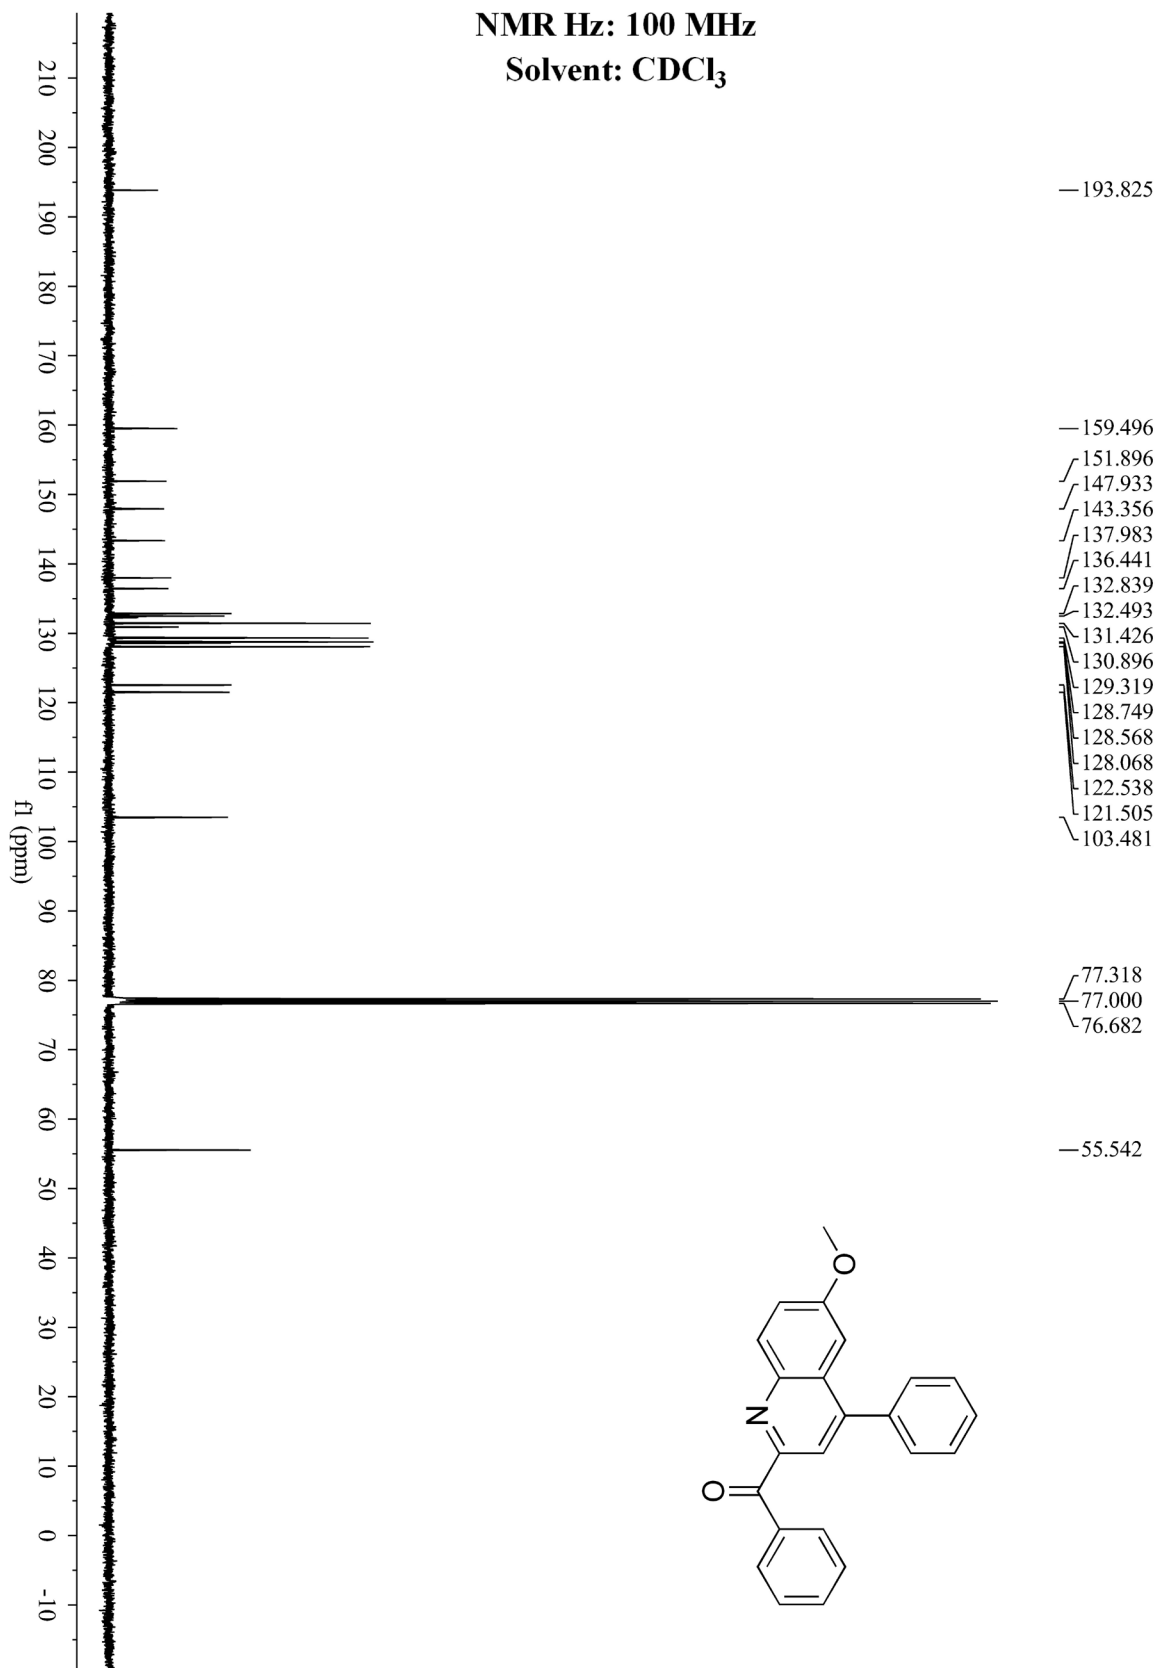



(6-Fluoro-4-phenylquinolin-2-yl)(phenyl)methanone (3ga)

NMR Hz: 400 MHz

Solvent: CDCl<sub>3</sub>

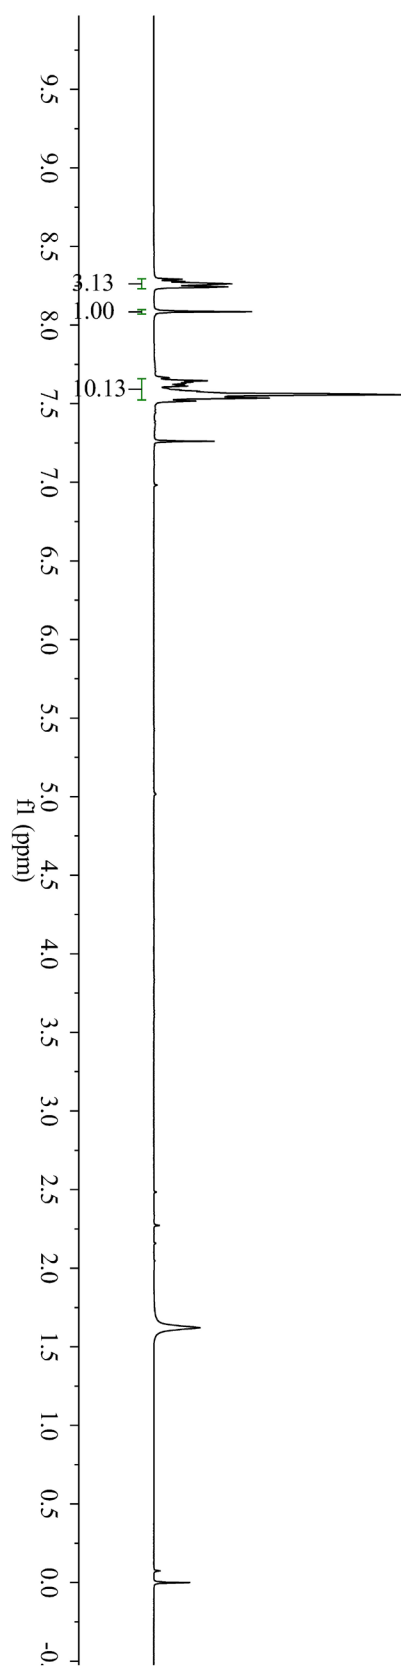

8.292  
8.278  
8.269  
8.262  
8.255  
8.244  
8.240  
8.086  
7.646  
7.637  
7.612  
7.580  
7.573  
7.561  
7.556  
7.545  
7.536

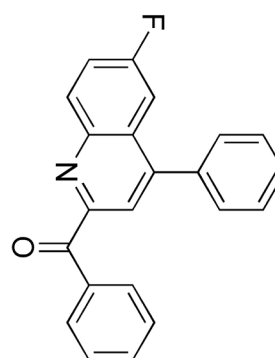

0.074  
-0.000

NMR Hz: 100 MHz

Solvent: CDCl<sub>3</sub>

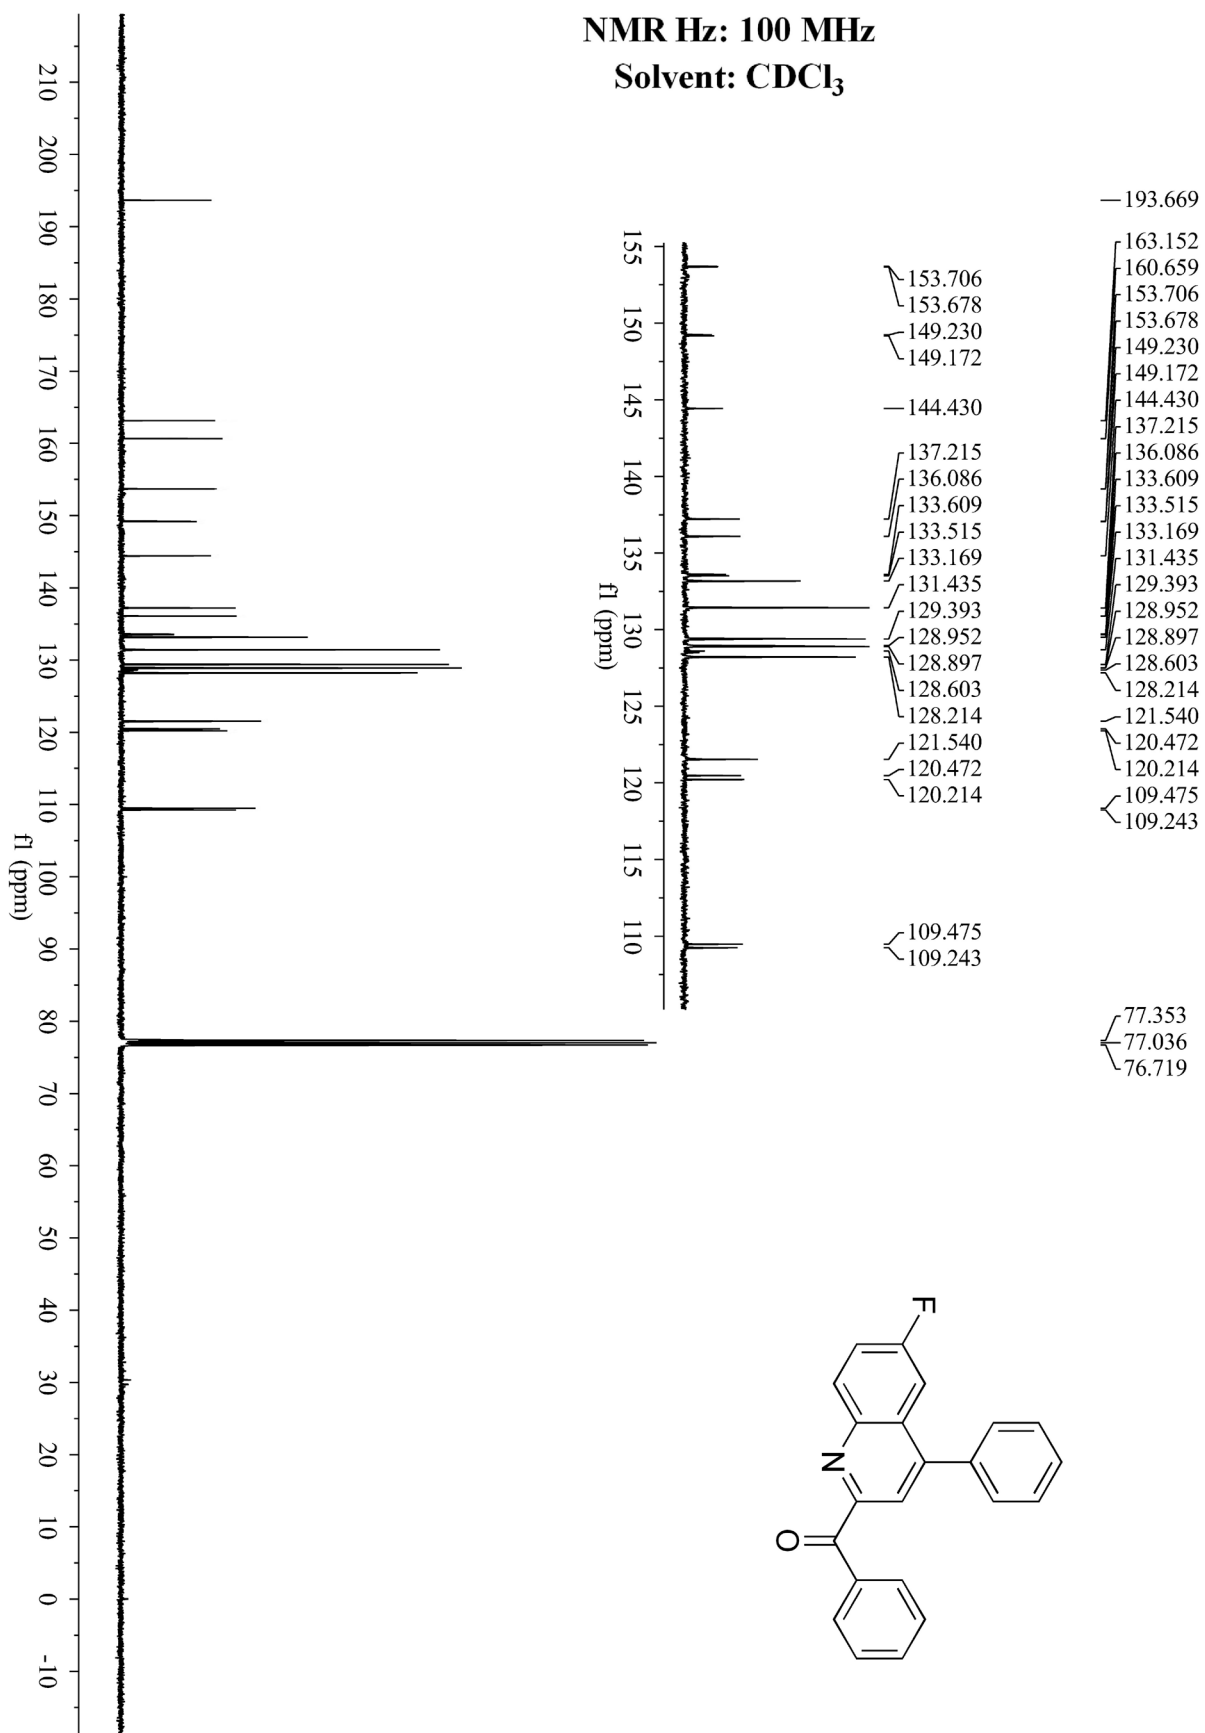

NMR Hz: 282 MHz  
Solvent: CDCl<sub>3</sub>

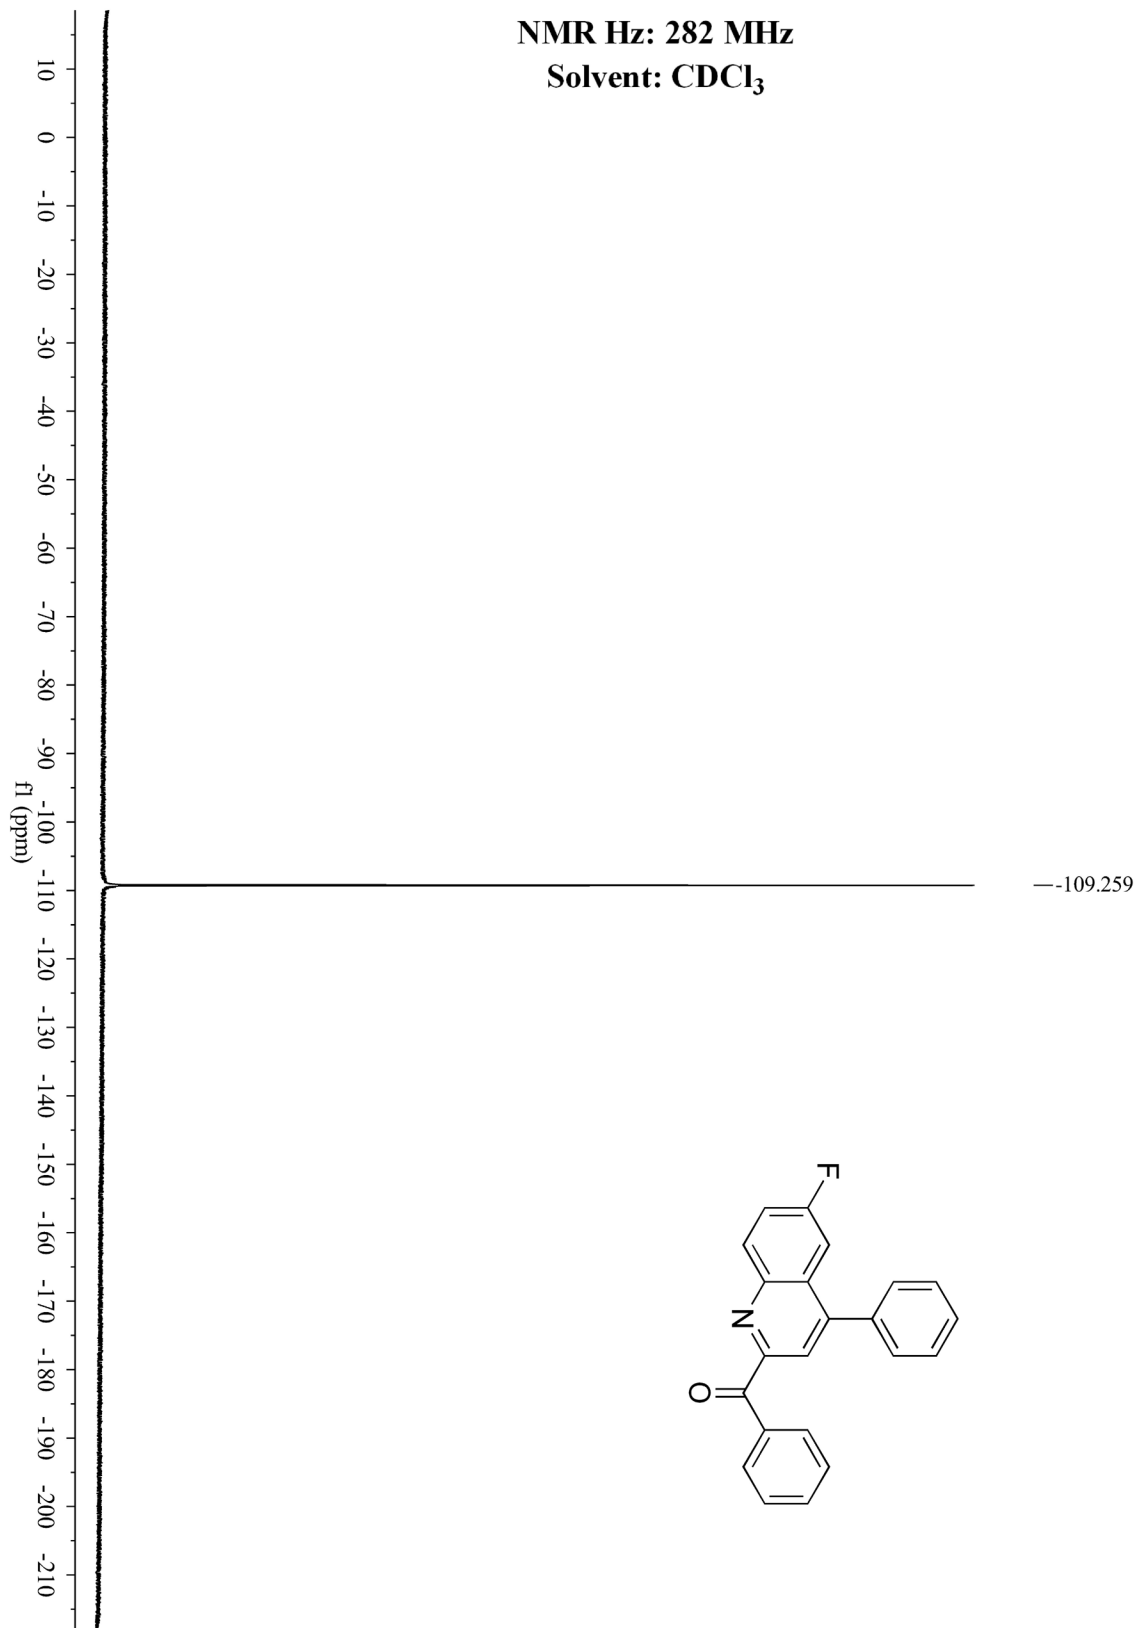

(6-Chloro-4-phenylquinolin-2-yl)(phenyl)methanone (3ha)

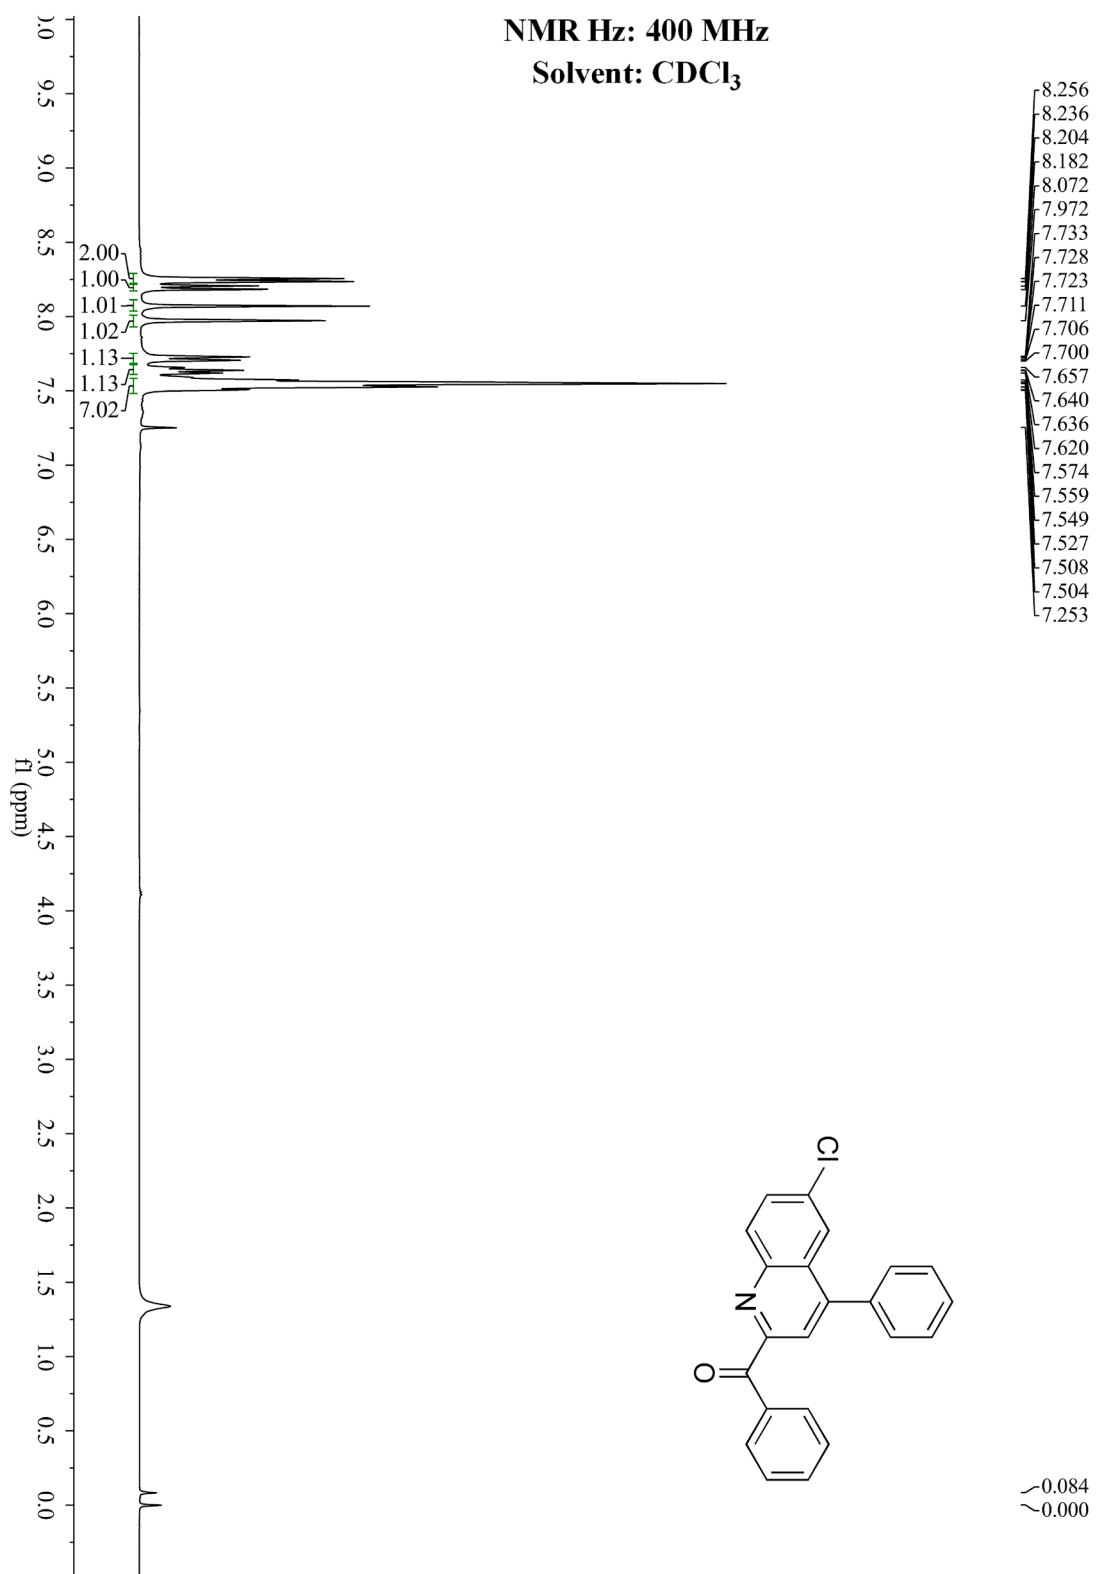

NMR Hz: 100 MHz

Solvent: CDCl<sub>3</sub>

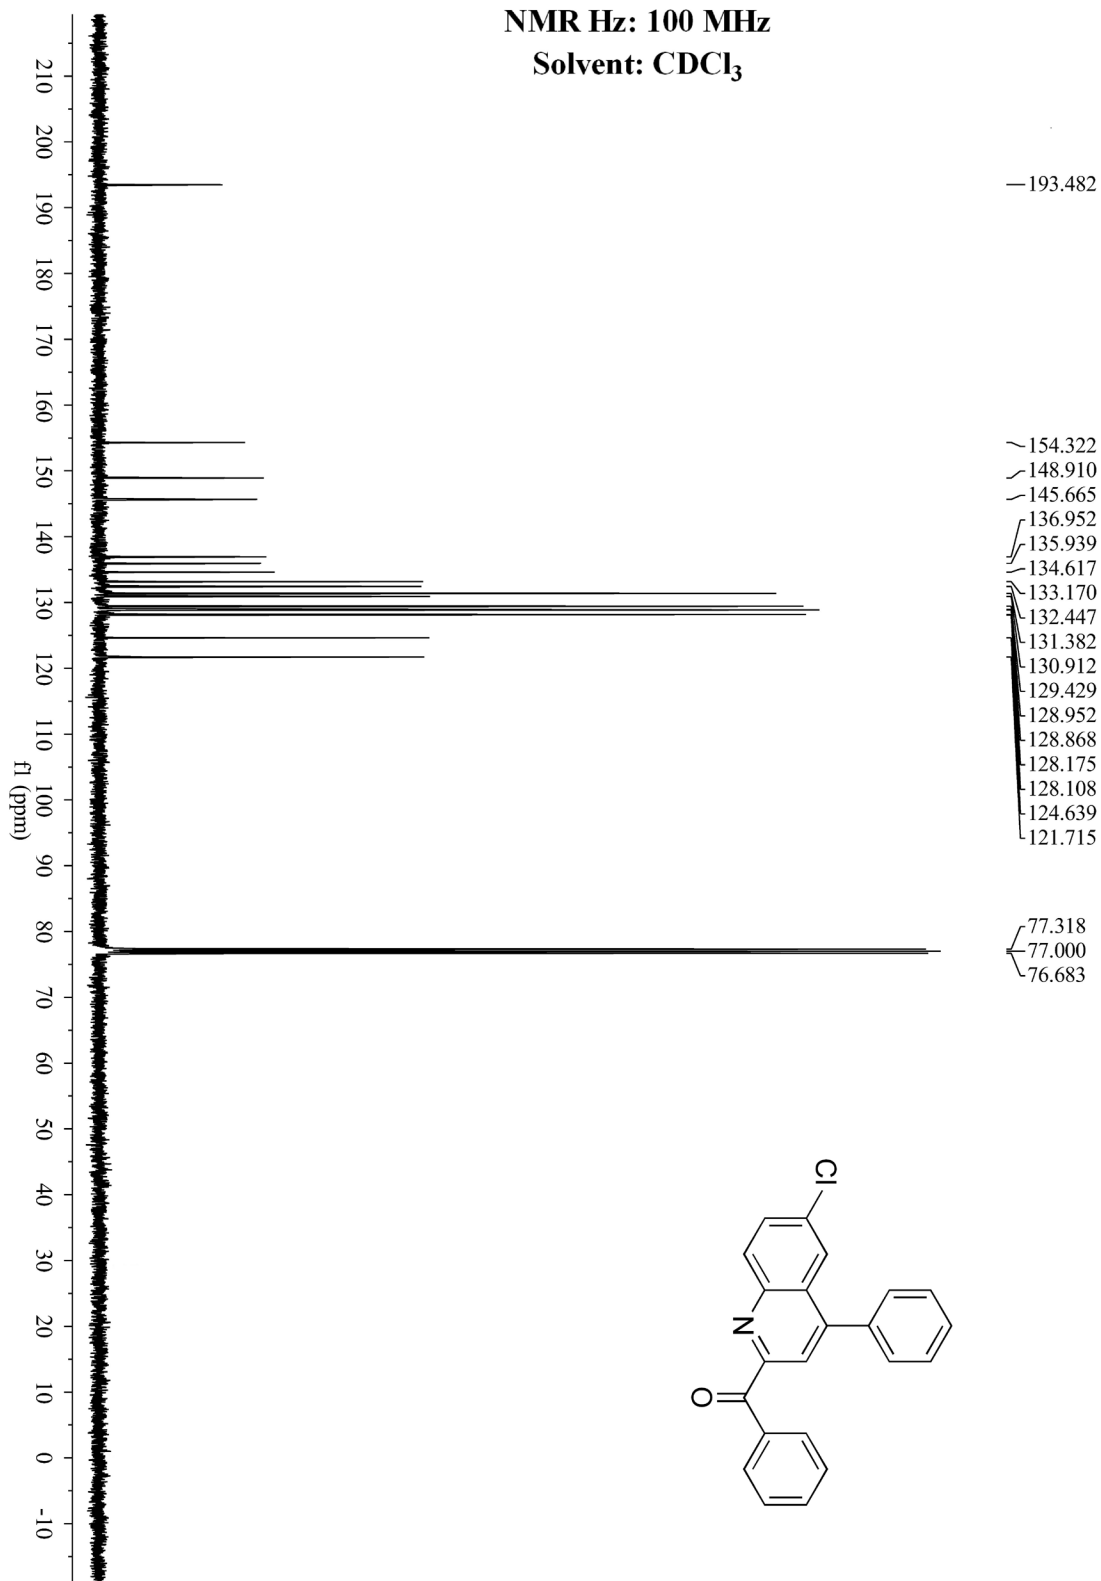

(6-Bromo-4-phenylquinolin-2-yl)(phenyl)methanone (3ia)

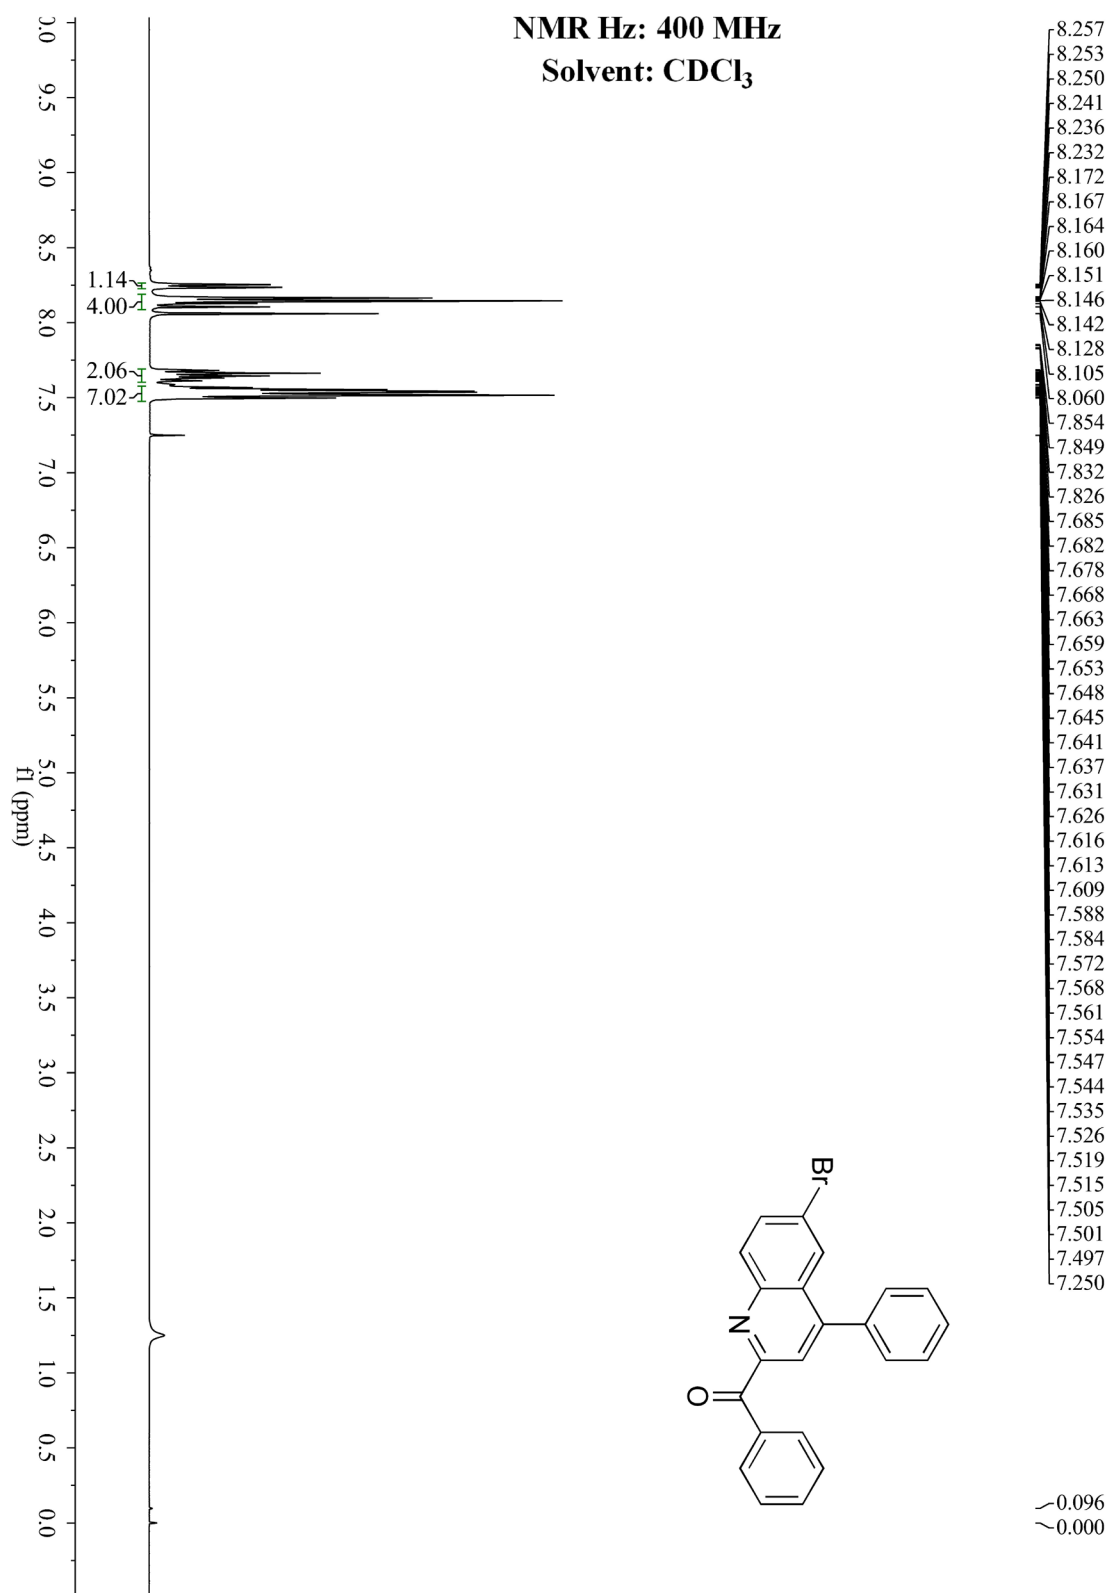

NMR Hz: 100 MHz  
Solvent: CDCl<sub>3</sub>

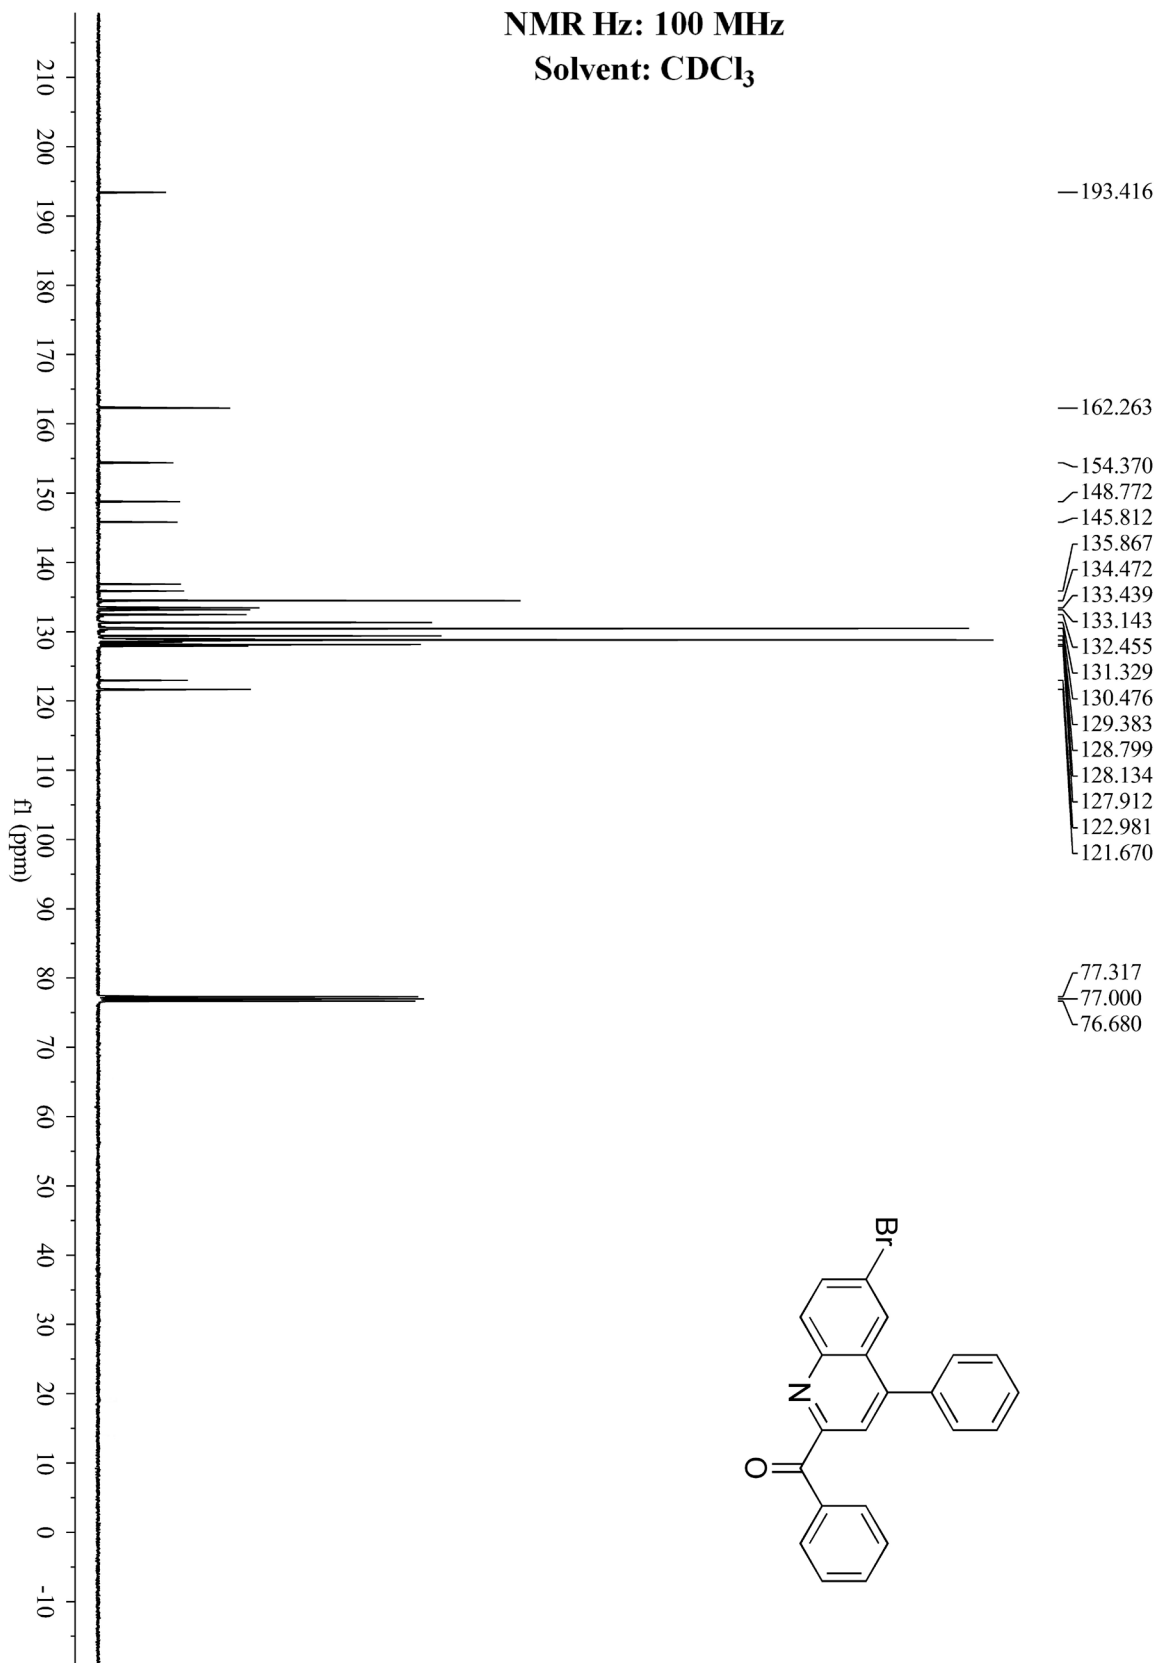

(7-Methoxy-4-phenylquinolin-2-yl)(phenyl)methanone(3ja)

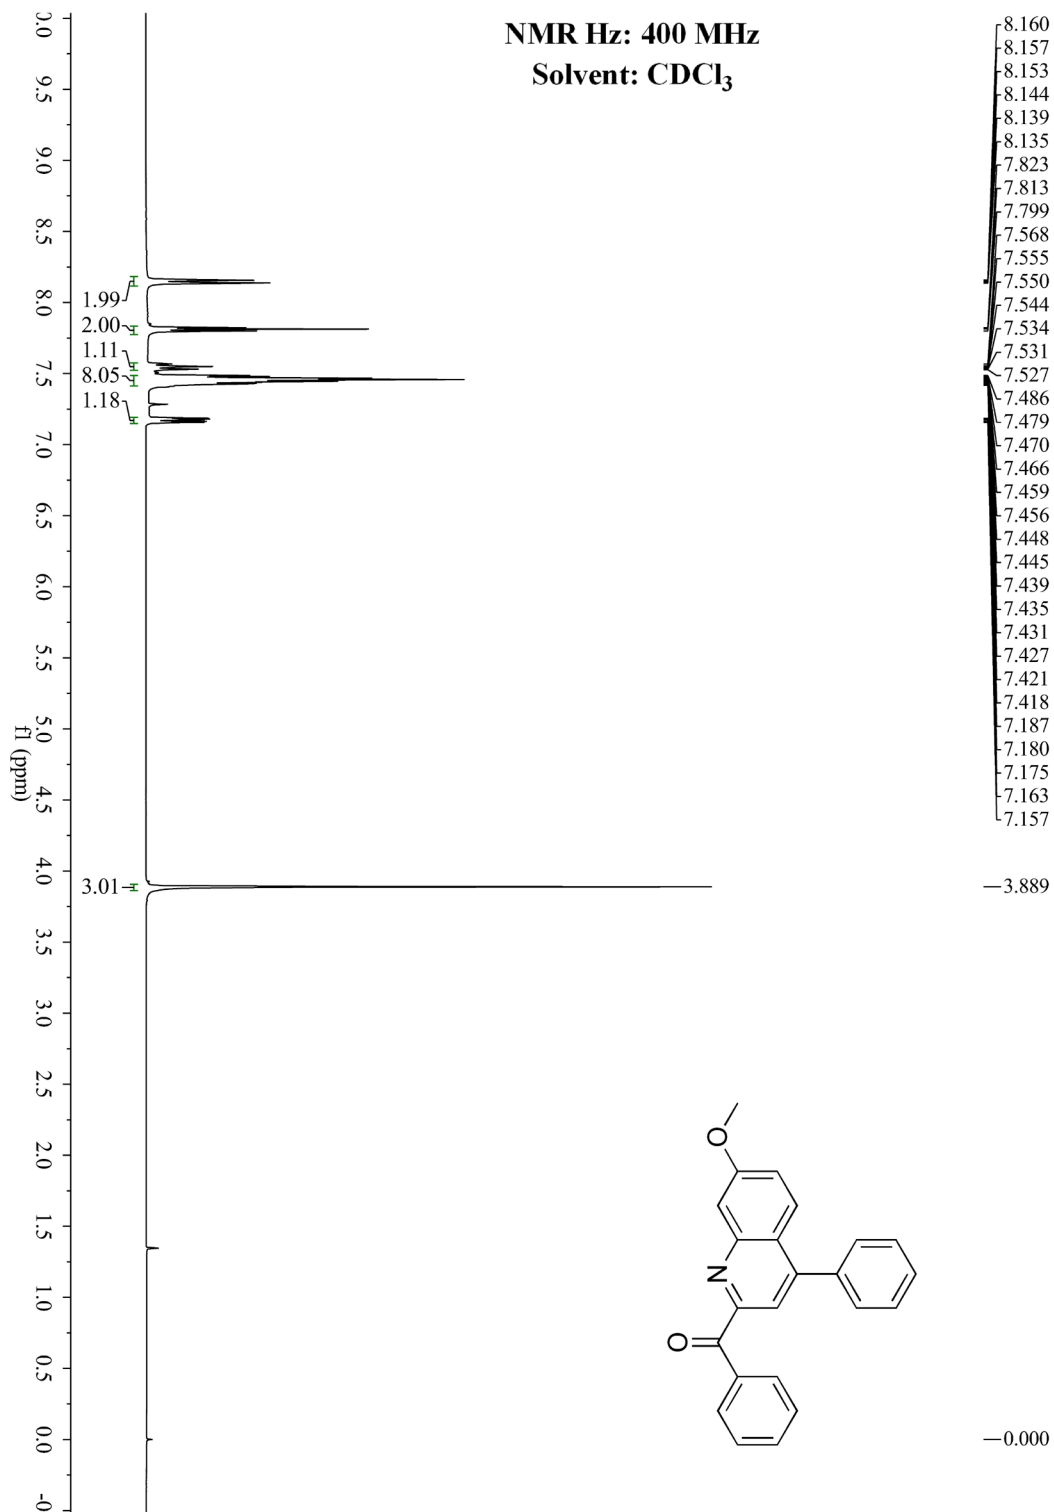



NMR Hz: 100 MHz  
Solvent: CDCl<sub>3</sub>

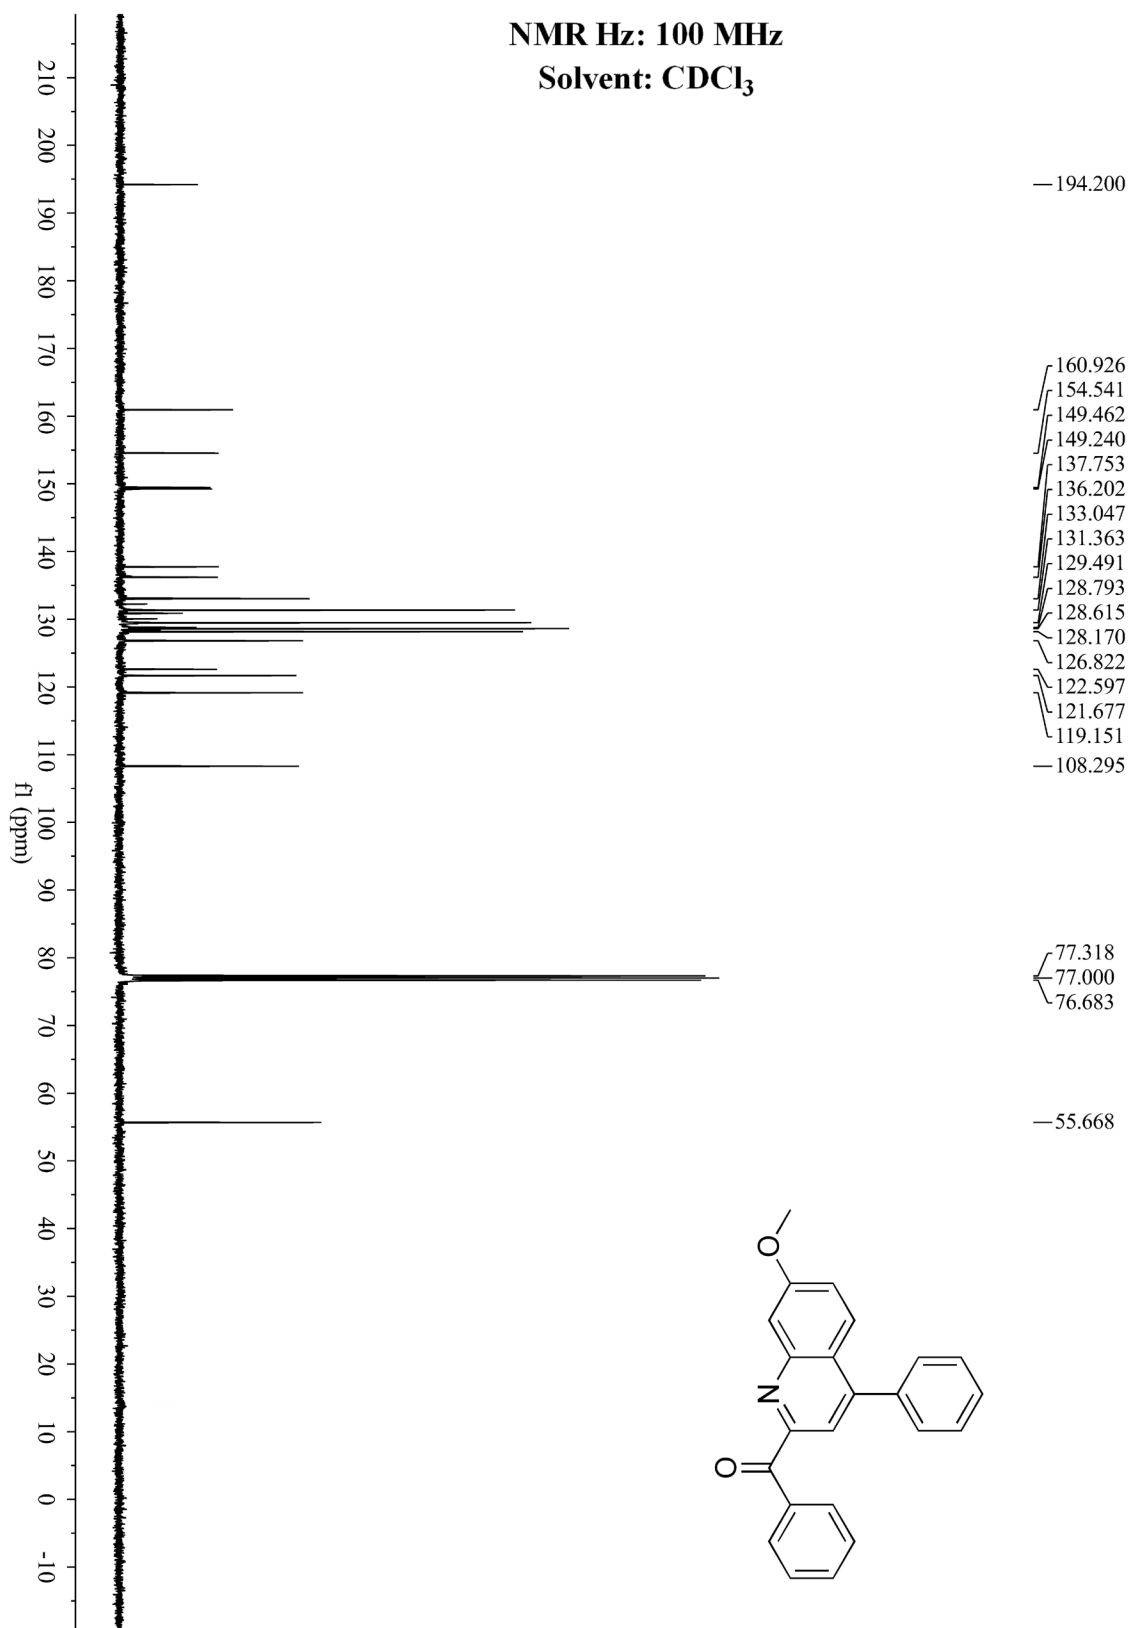

(8-Methyl-4-phenylquinolin-2-yl)(phenyl)methanone (3ka)

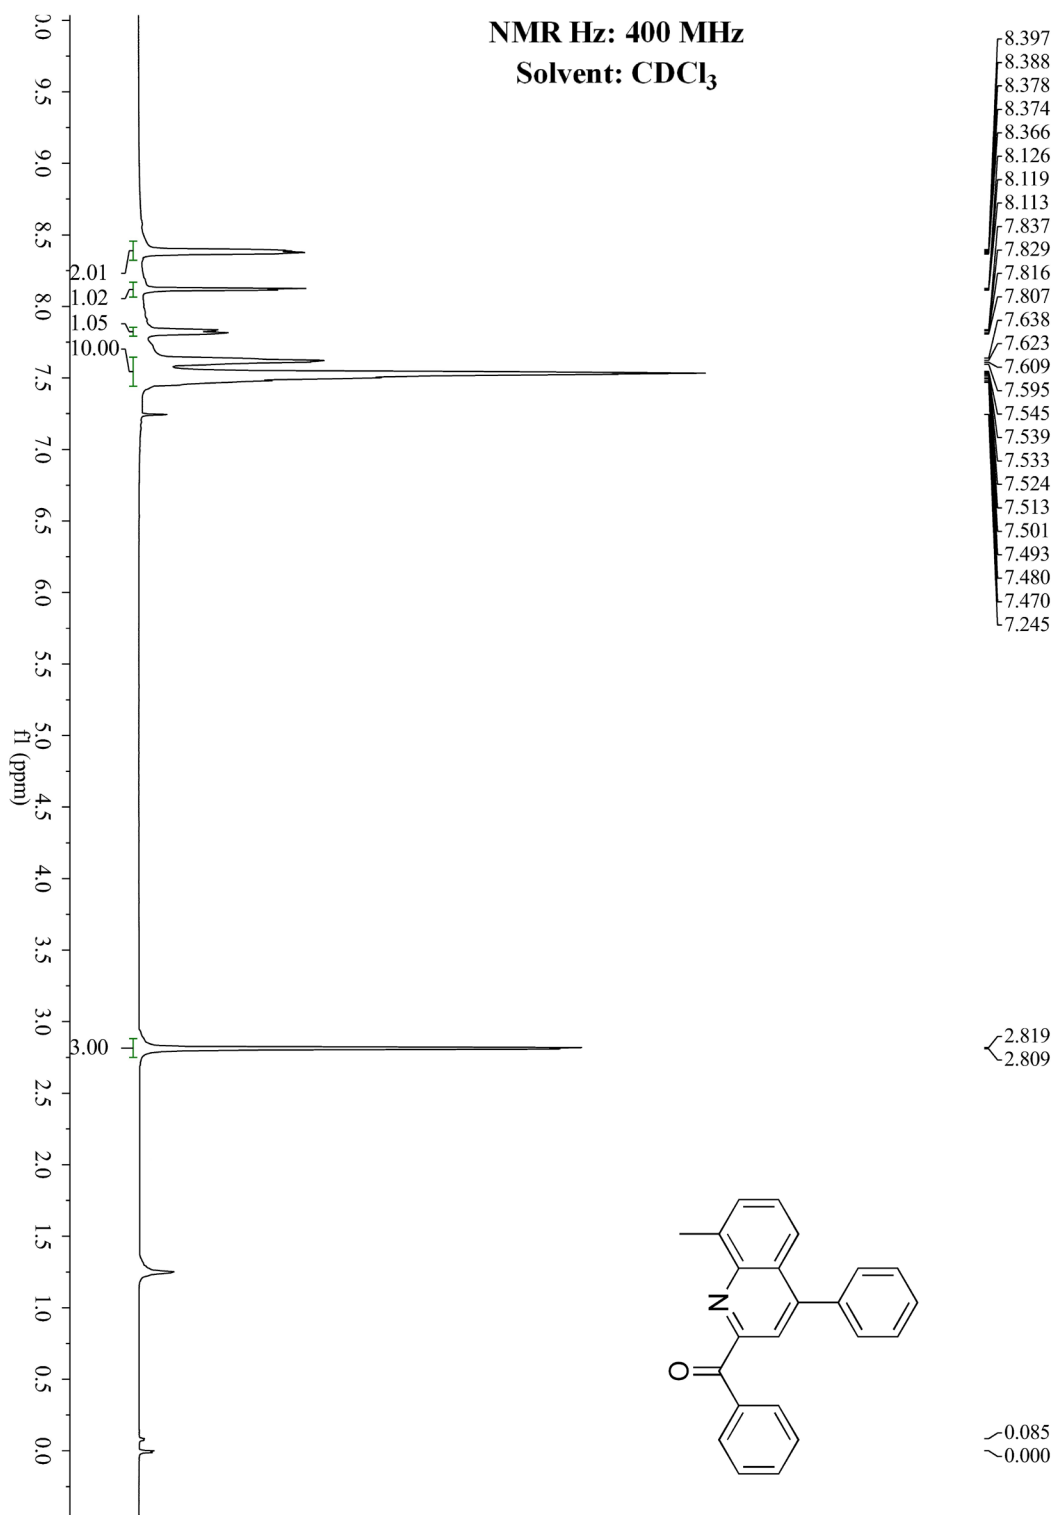

NMR Hz: 100 MHz  
Solvent: CDCl<sub>3</sub>

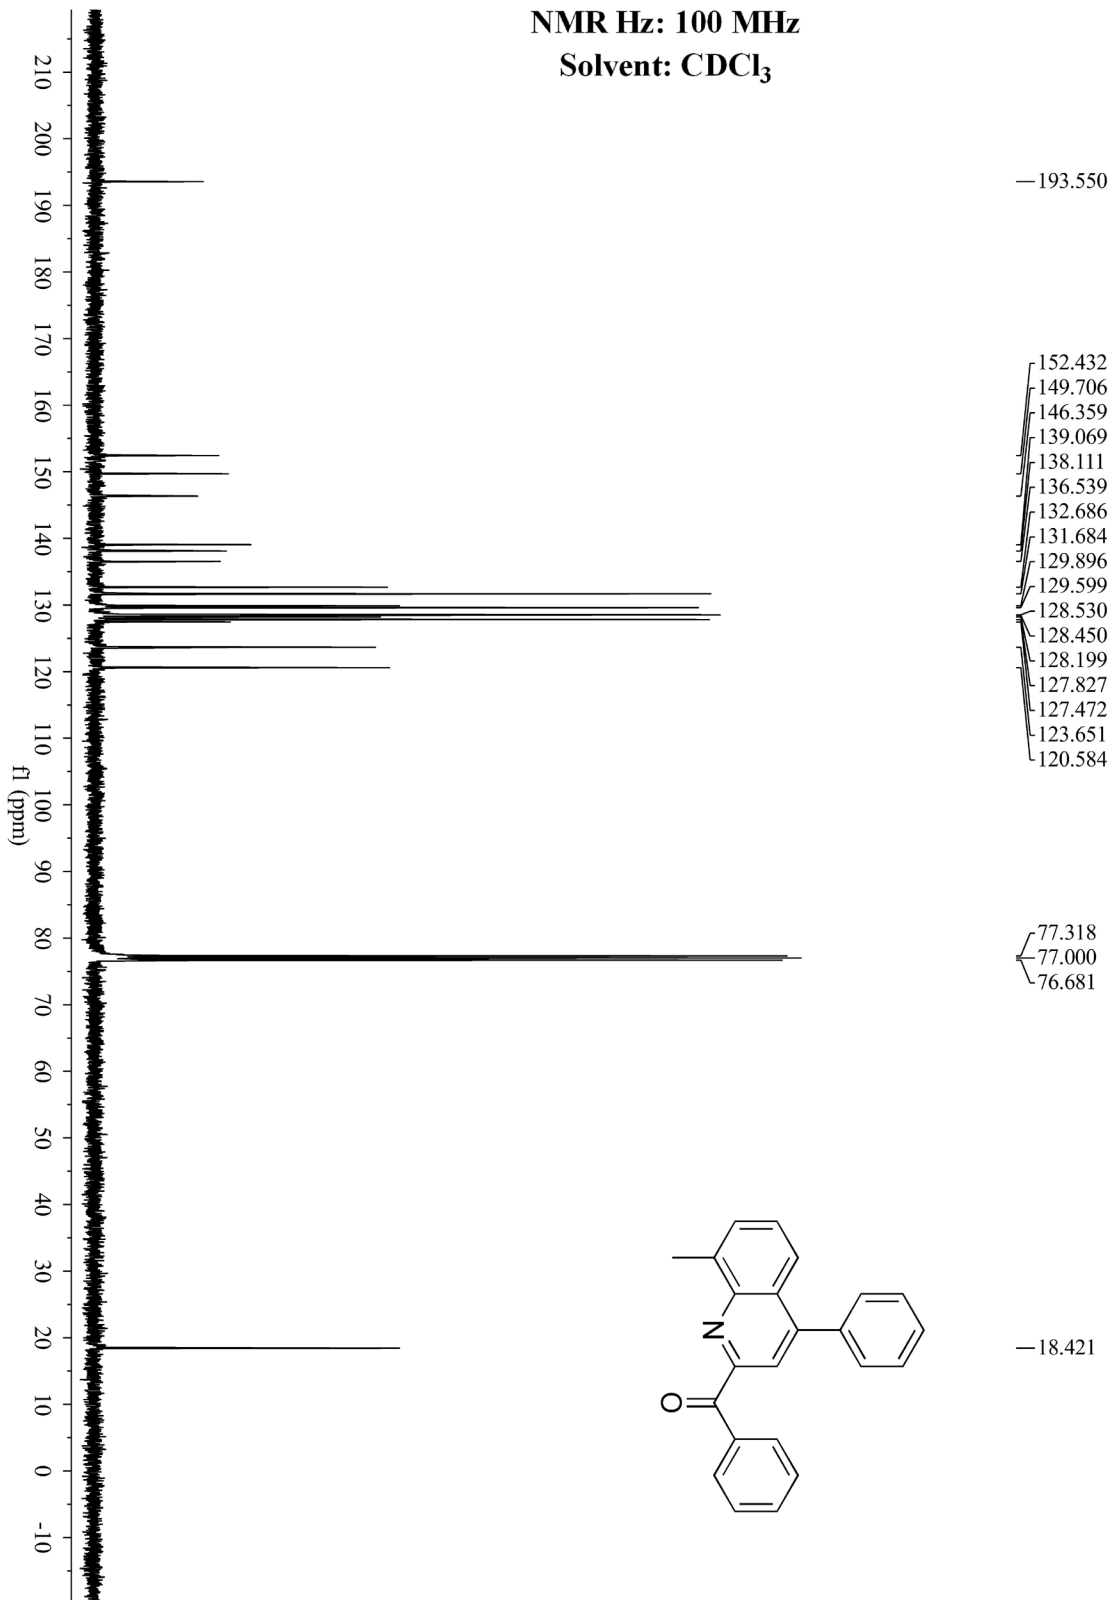

(4-(4-Fluorophenyl)quinolin-2-yl)(phenyl)methanone (3la)

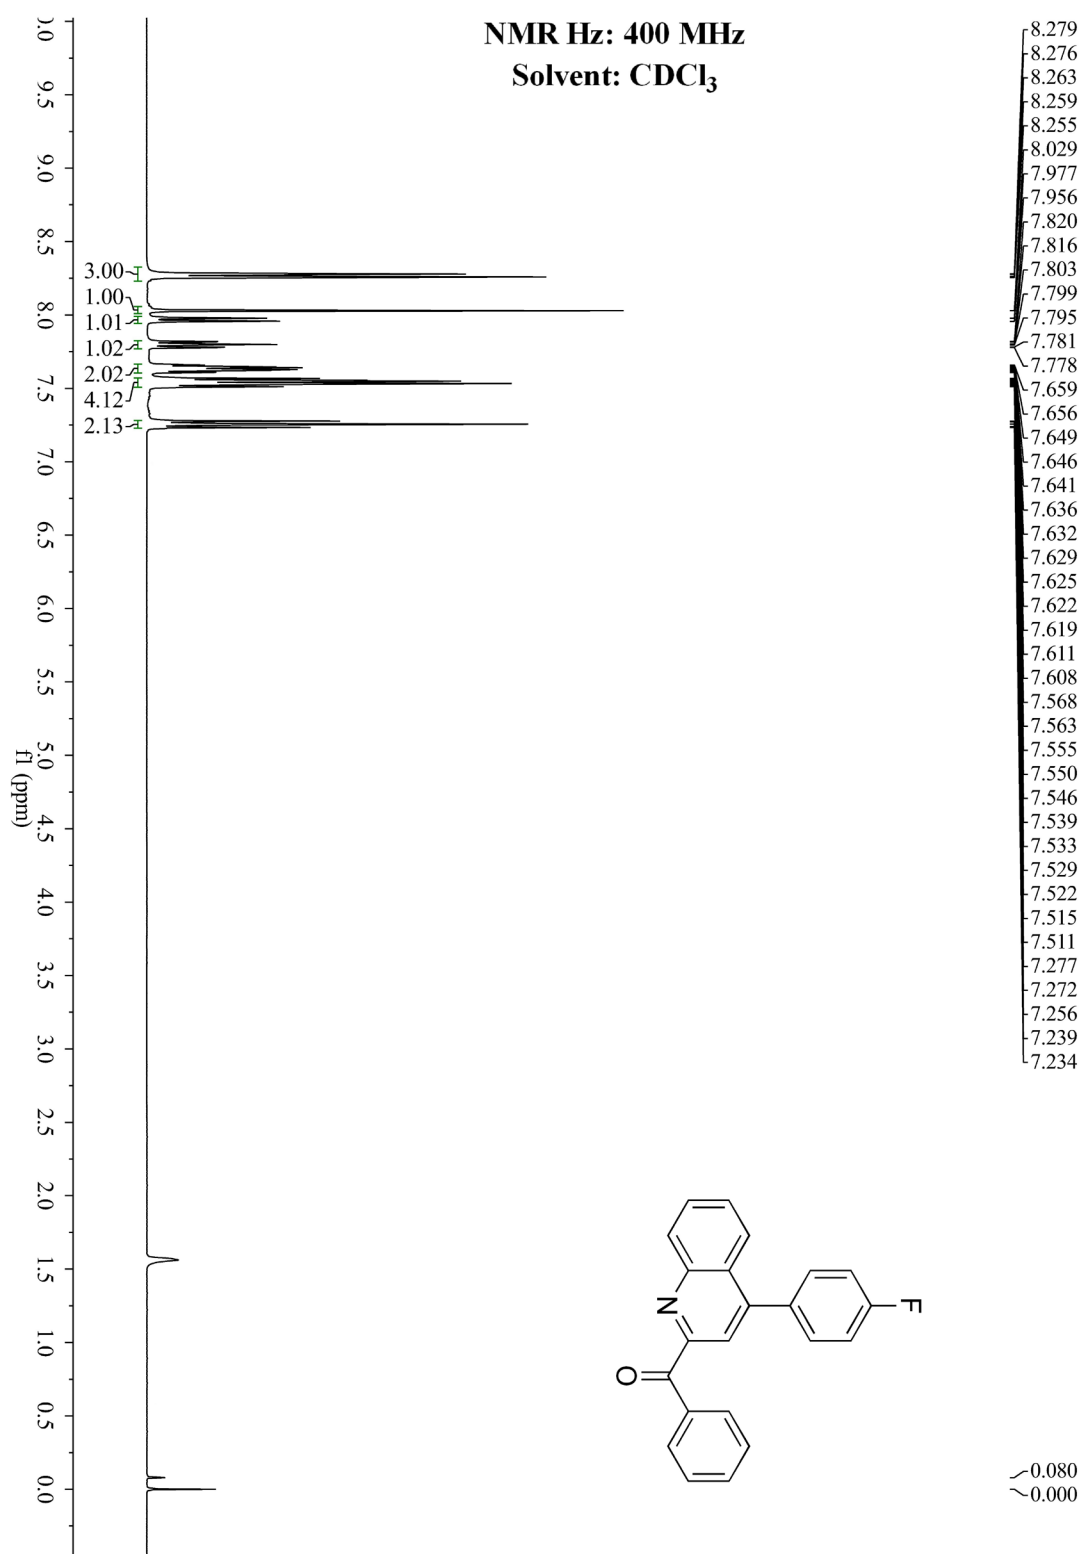

NMR Hz: 100 MHz  
Solvent: CDCl<sub>3</sub>

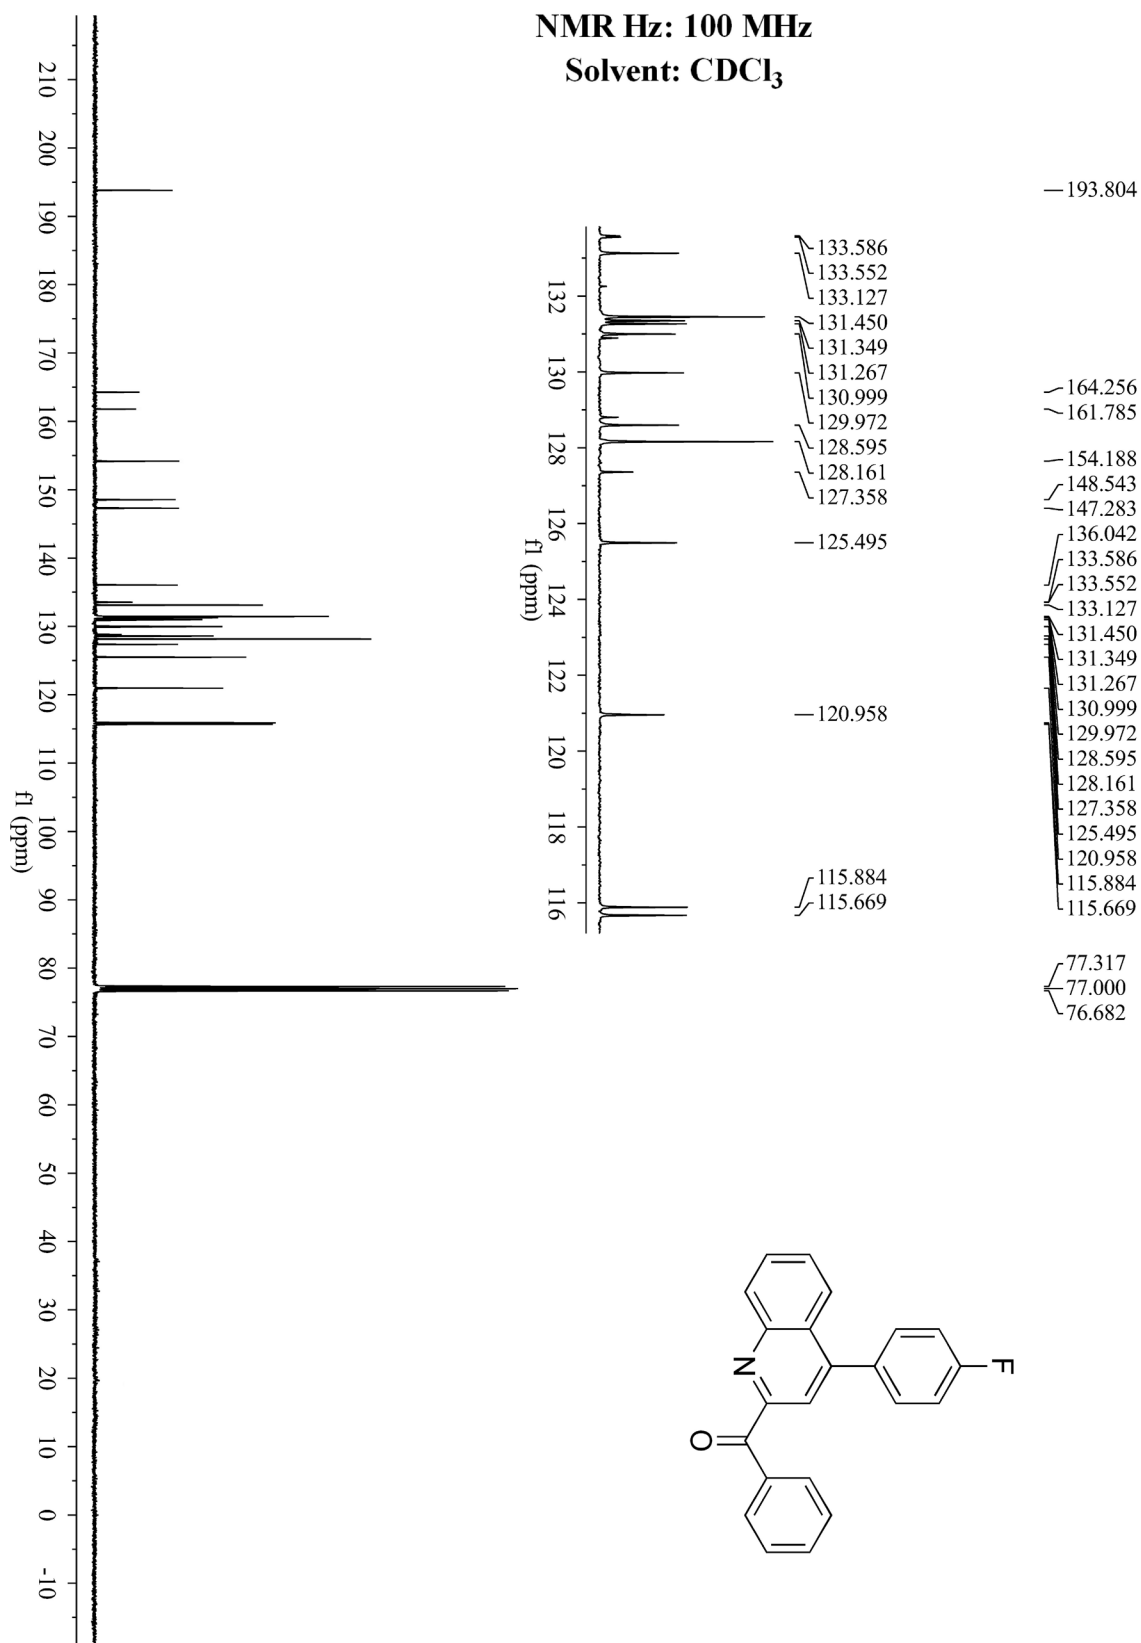

NMR Hz: 282 MHz  
Solvent: CDCl<sub>3</sub>

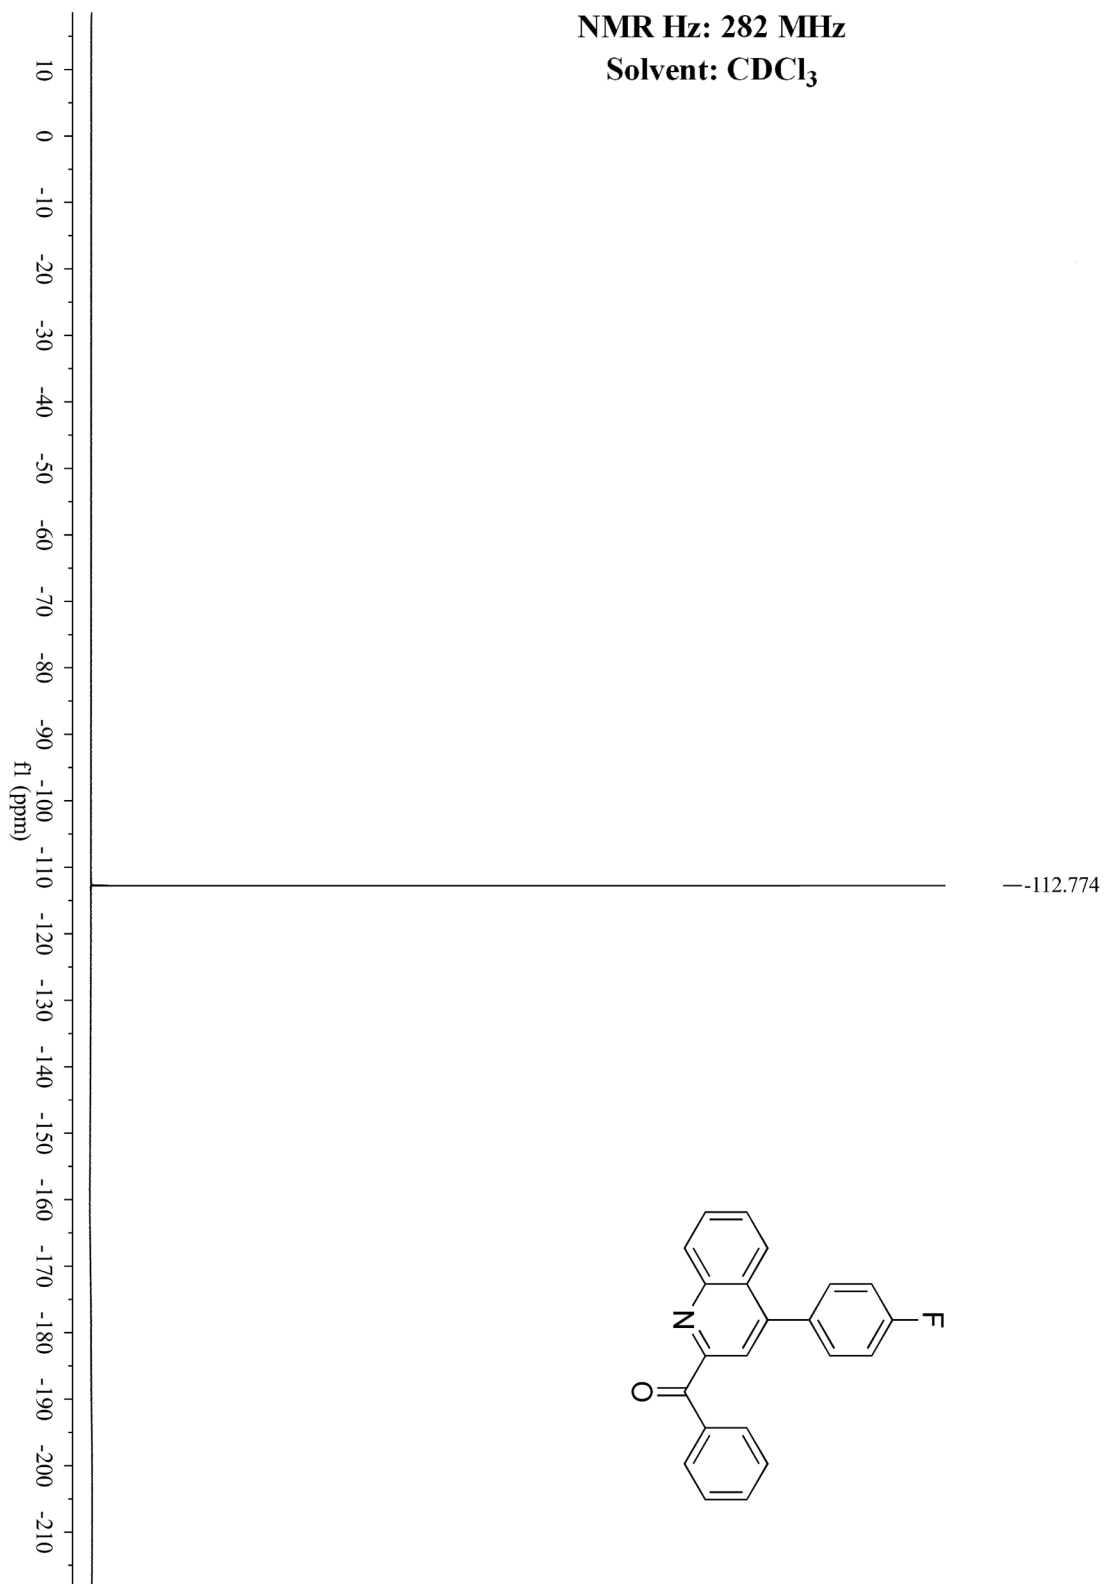

(4-(4-Chlorophenyl)quinolin-2-yl)(phenyl)methanone (3ma)

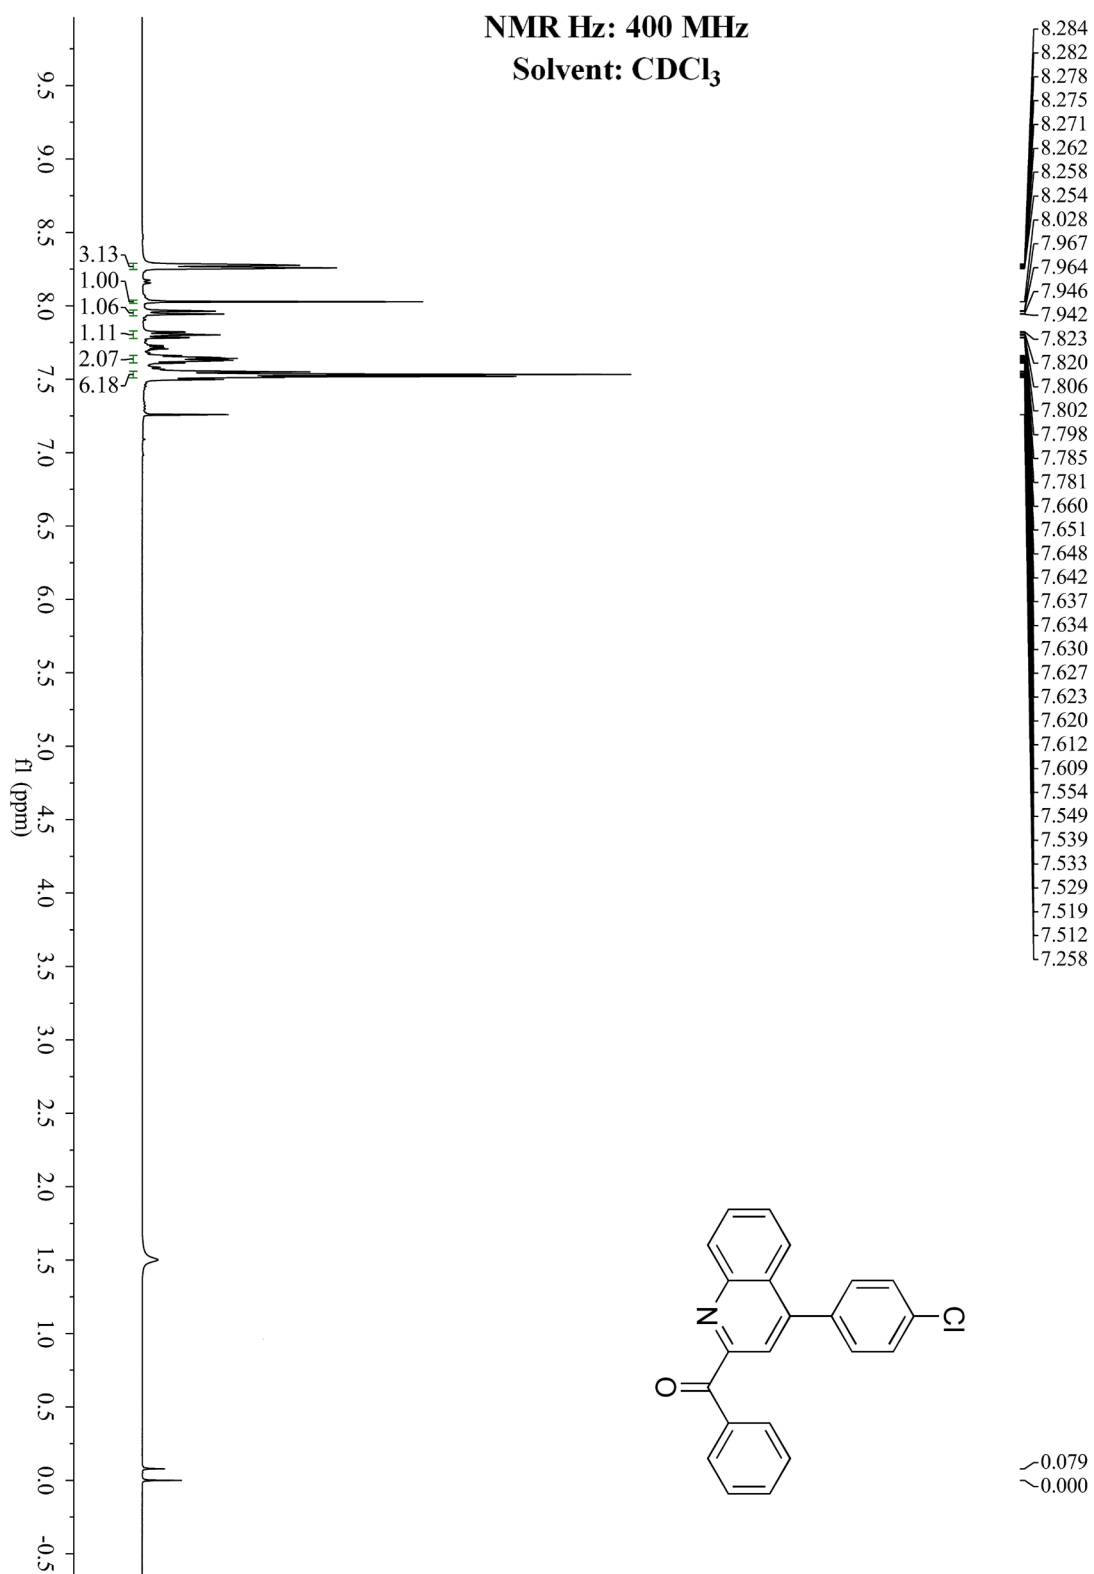

NMR Hz: 100 MHz

Solvent: CDCl<sub>3</sub>

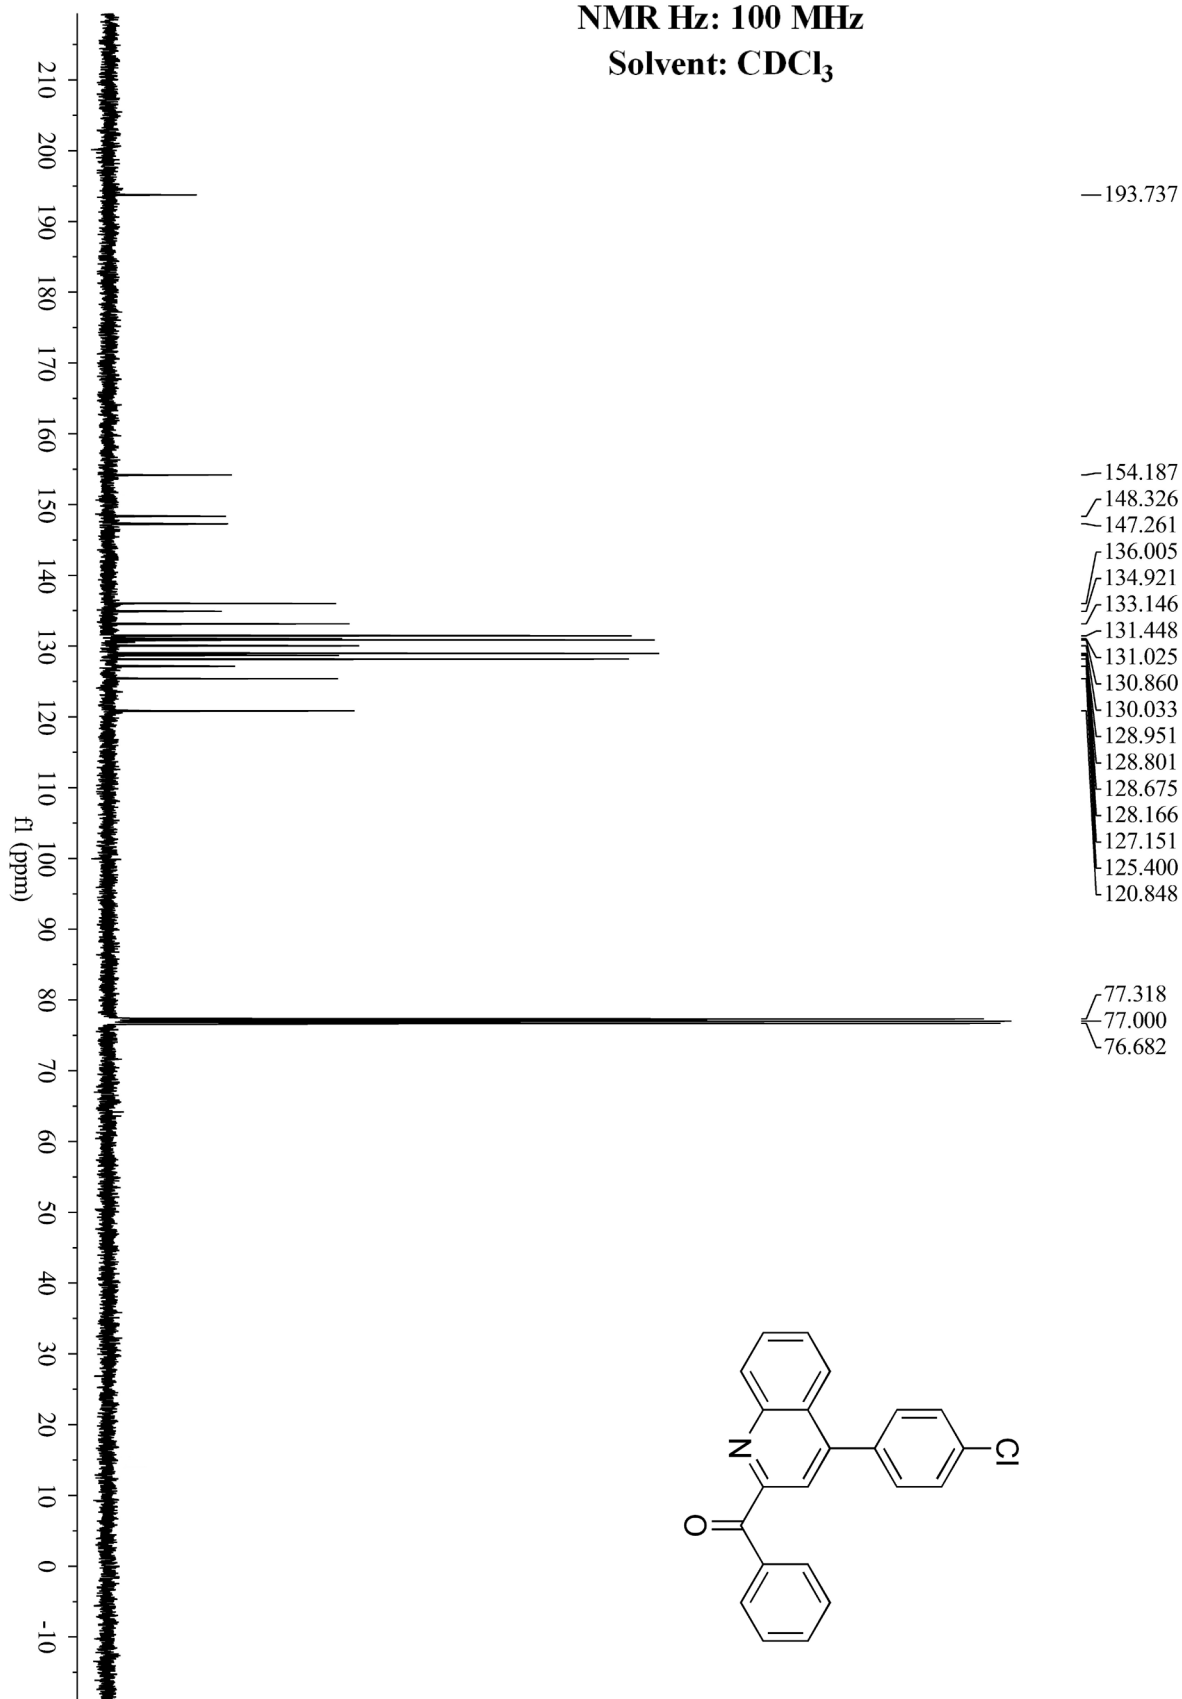



(4-(4-Bromophenyl)quinolin-2-yl)(phenyl)methanone (3na)

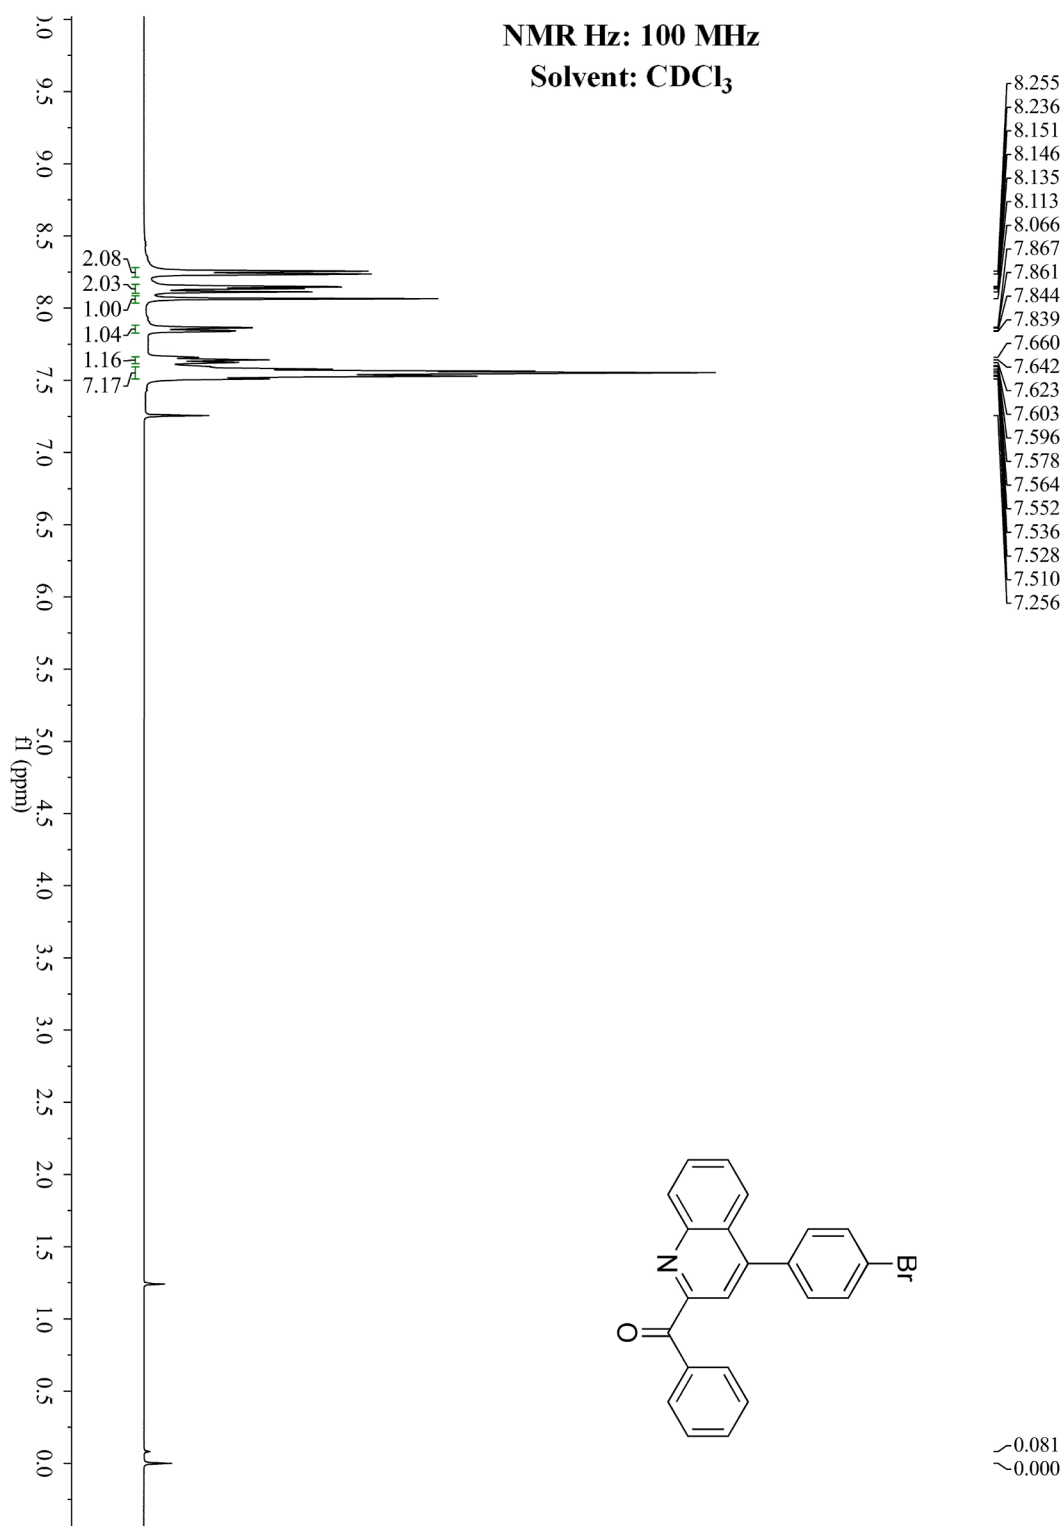

NMR Hz: 100 MHz

Solvent: CDCl<sub>3</sub>

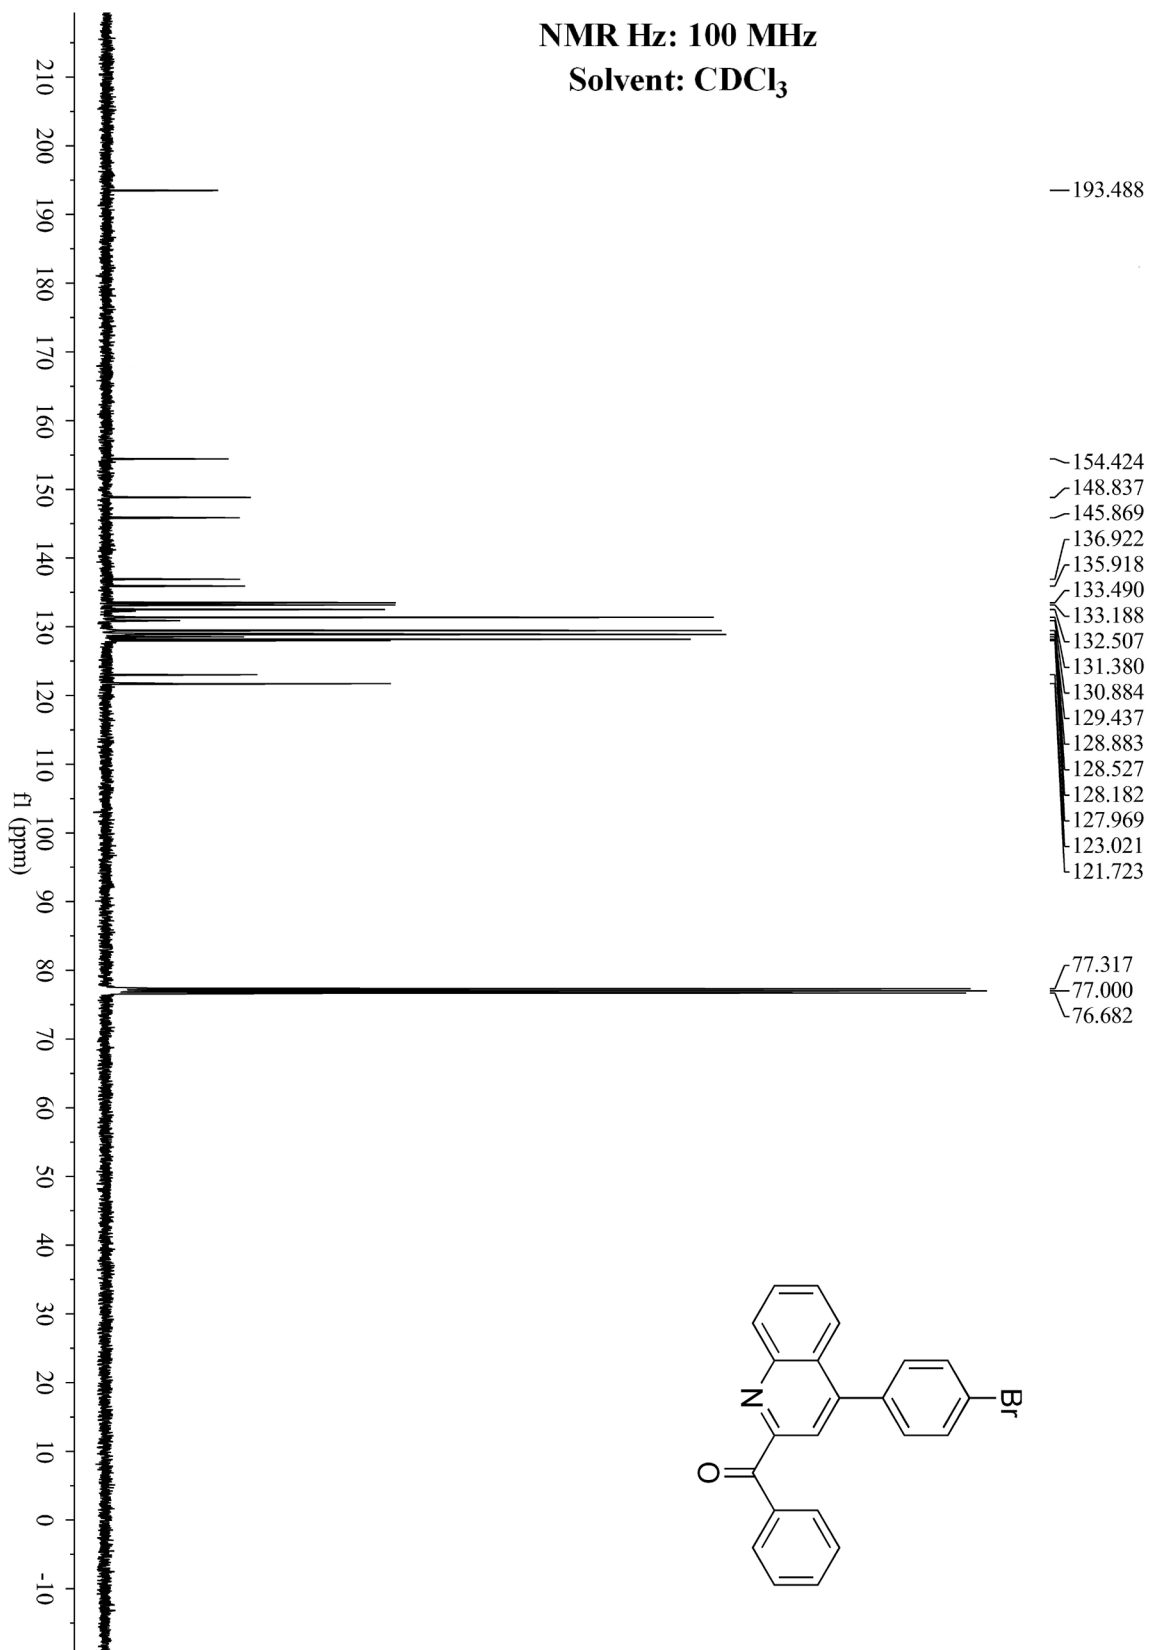

(4-(3-Methoxyphenyl)quinolin-2-yl)(phenyl)methanone(30a)

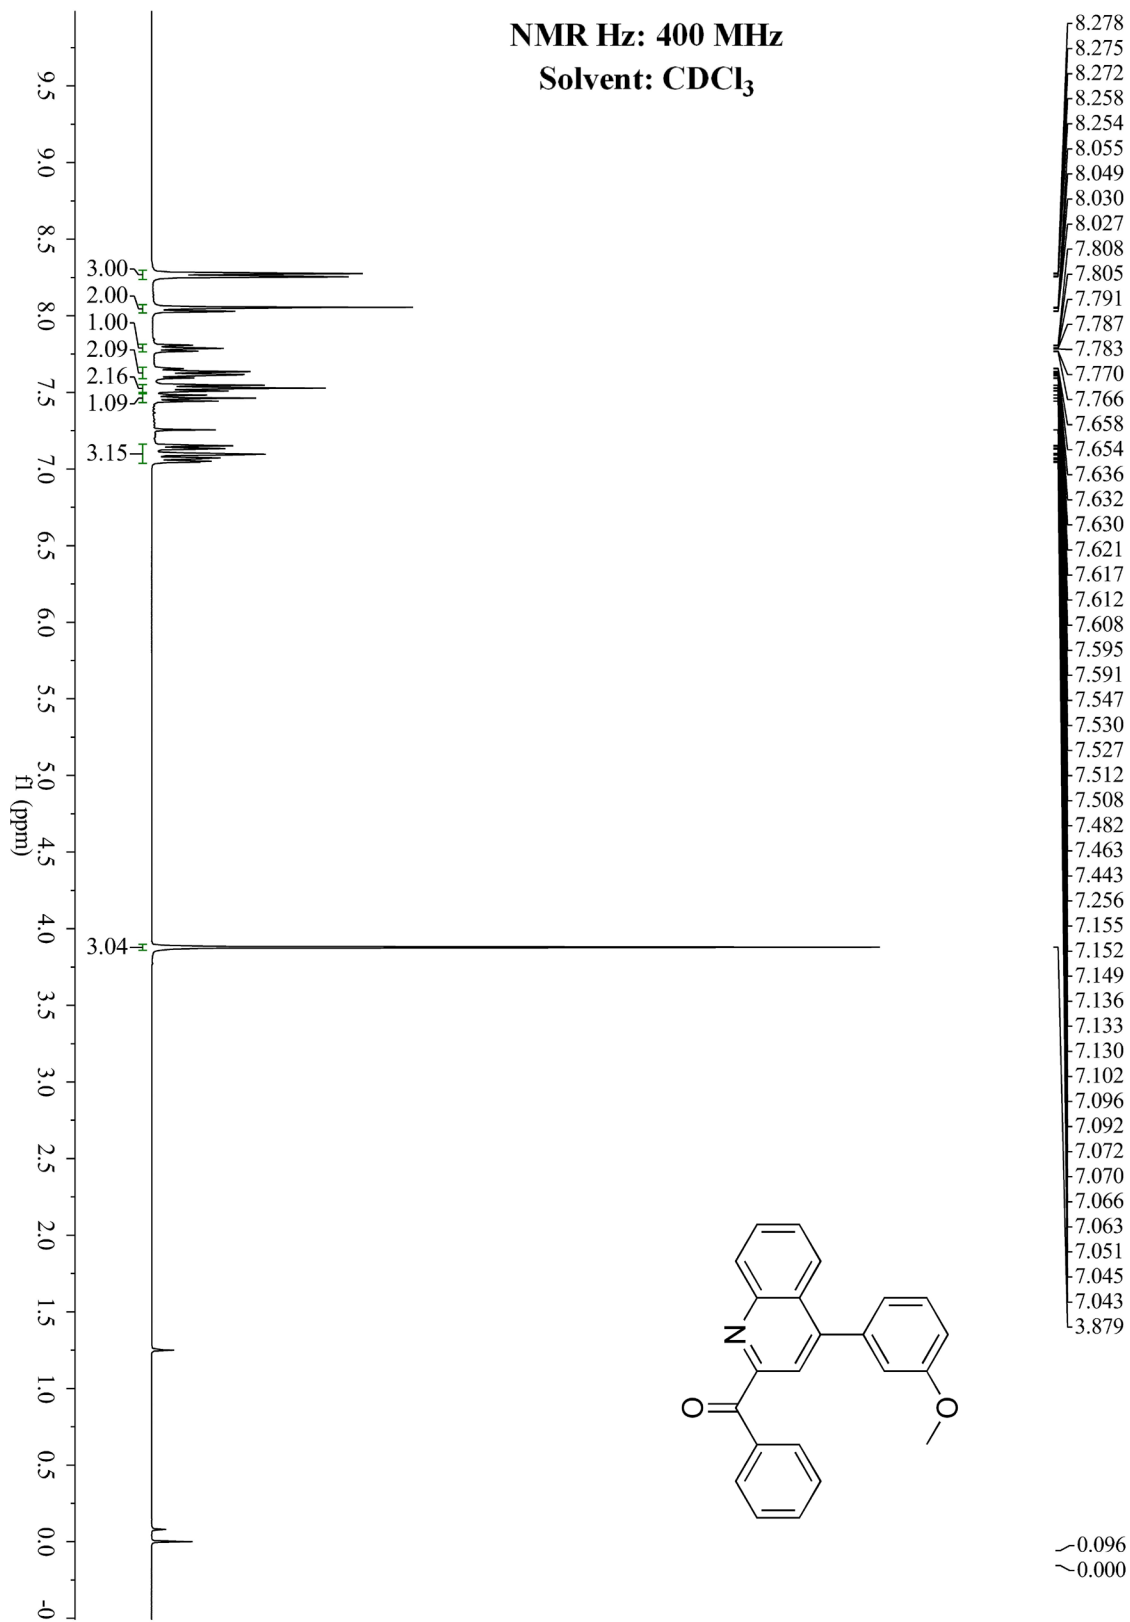

NMR Hz: 100 MHz  
Solvent: CDCl<sub>3</sub>

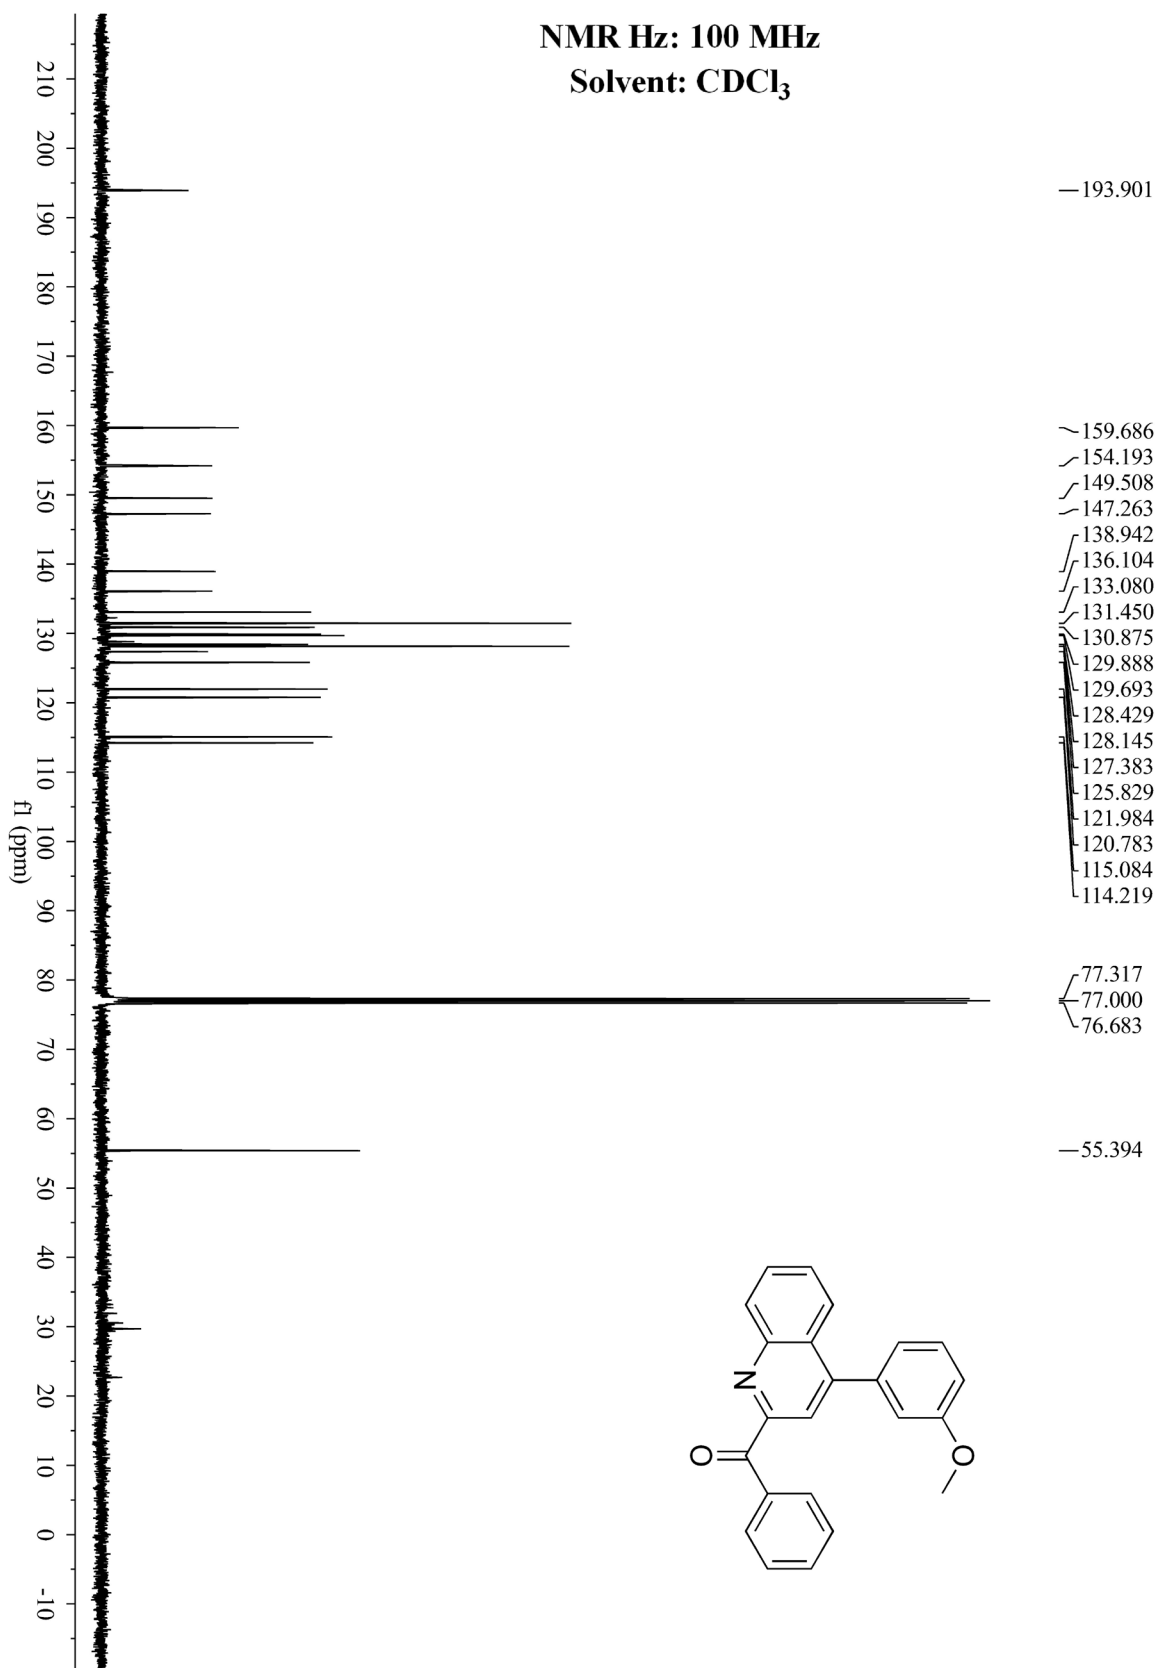

Phenyl(4-(o-tolyl)quinolin-2-yl)methanone (3pa)

NMR Hz: 400 MHz

Solvent: CDCl<sub>3</sub>

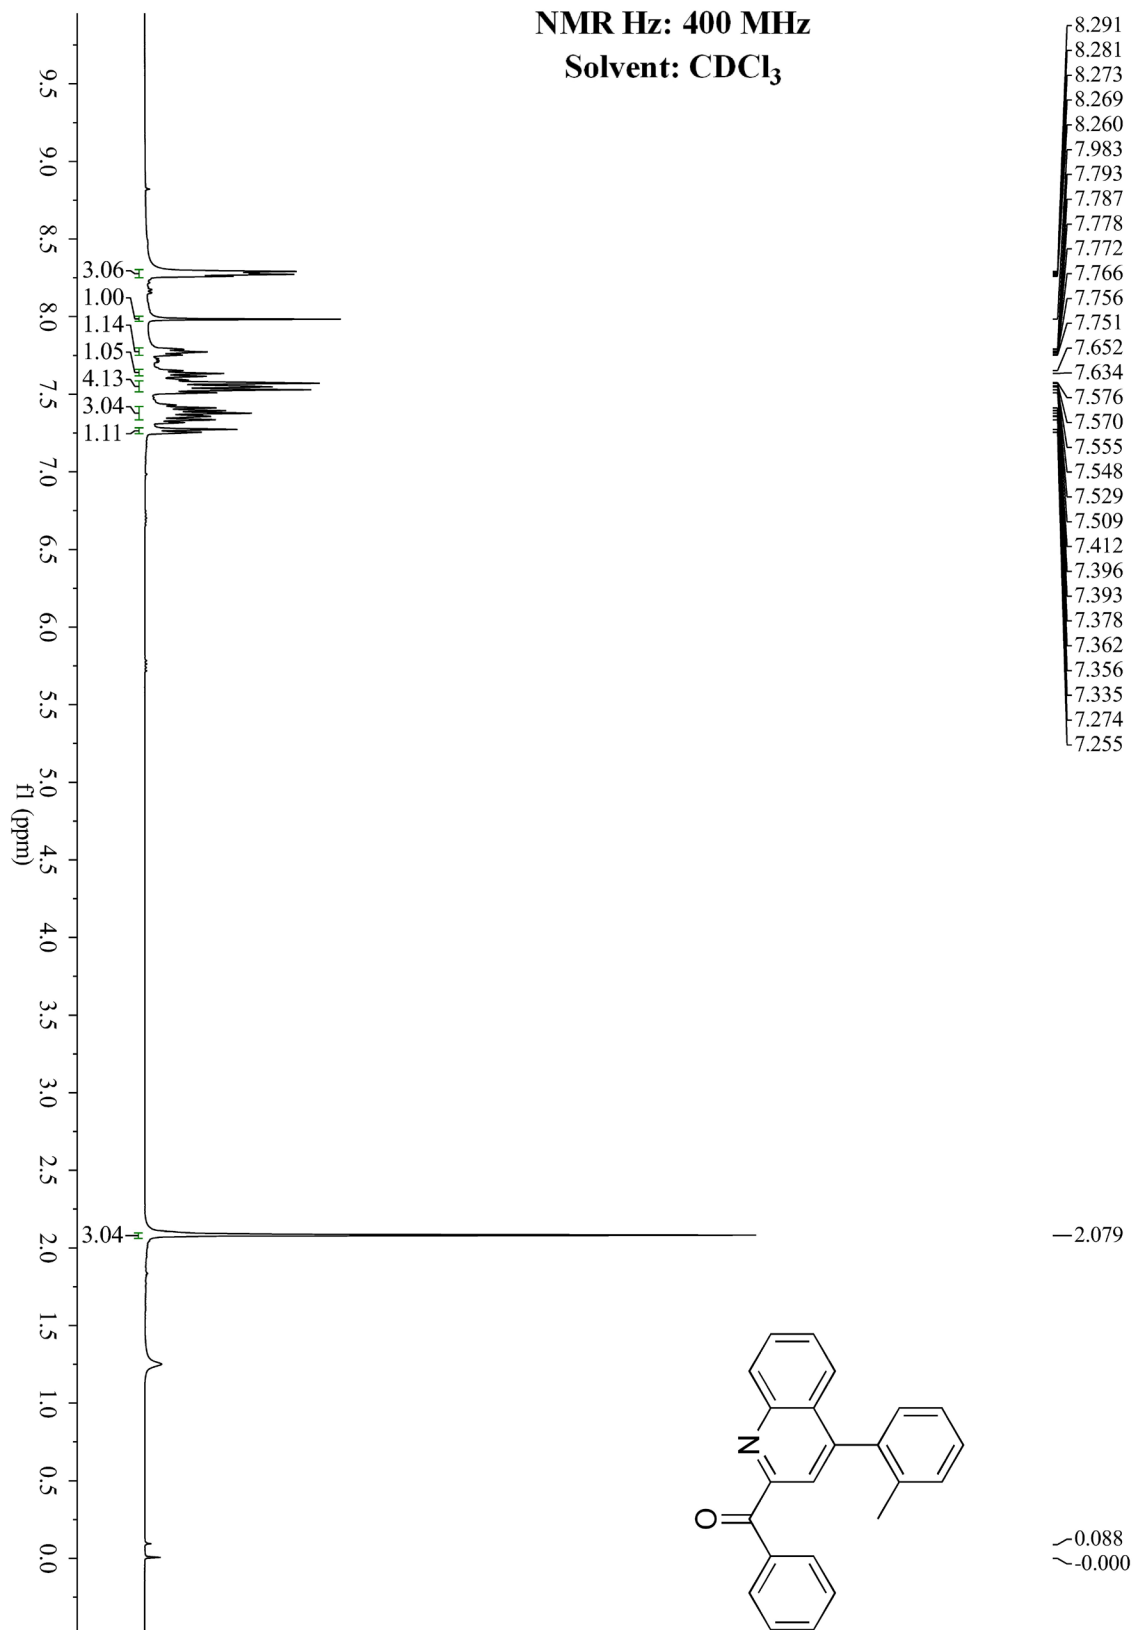

NMR Hz: 100 MHz  
Solvent: CDCl<sub>3</sub>

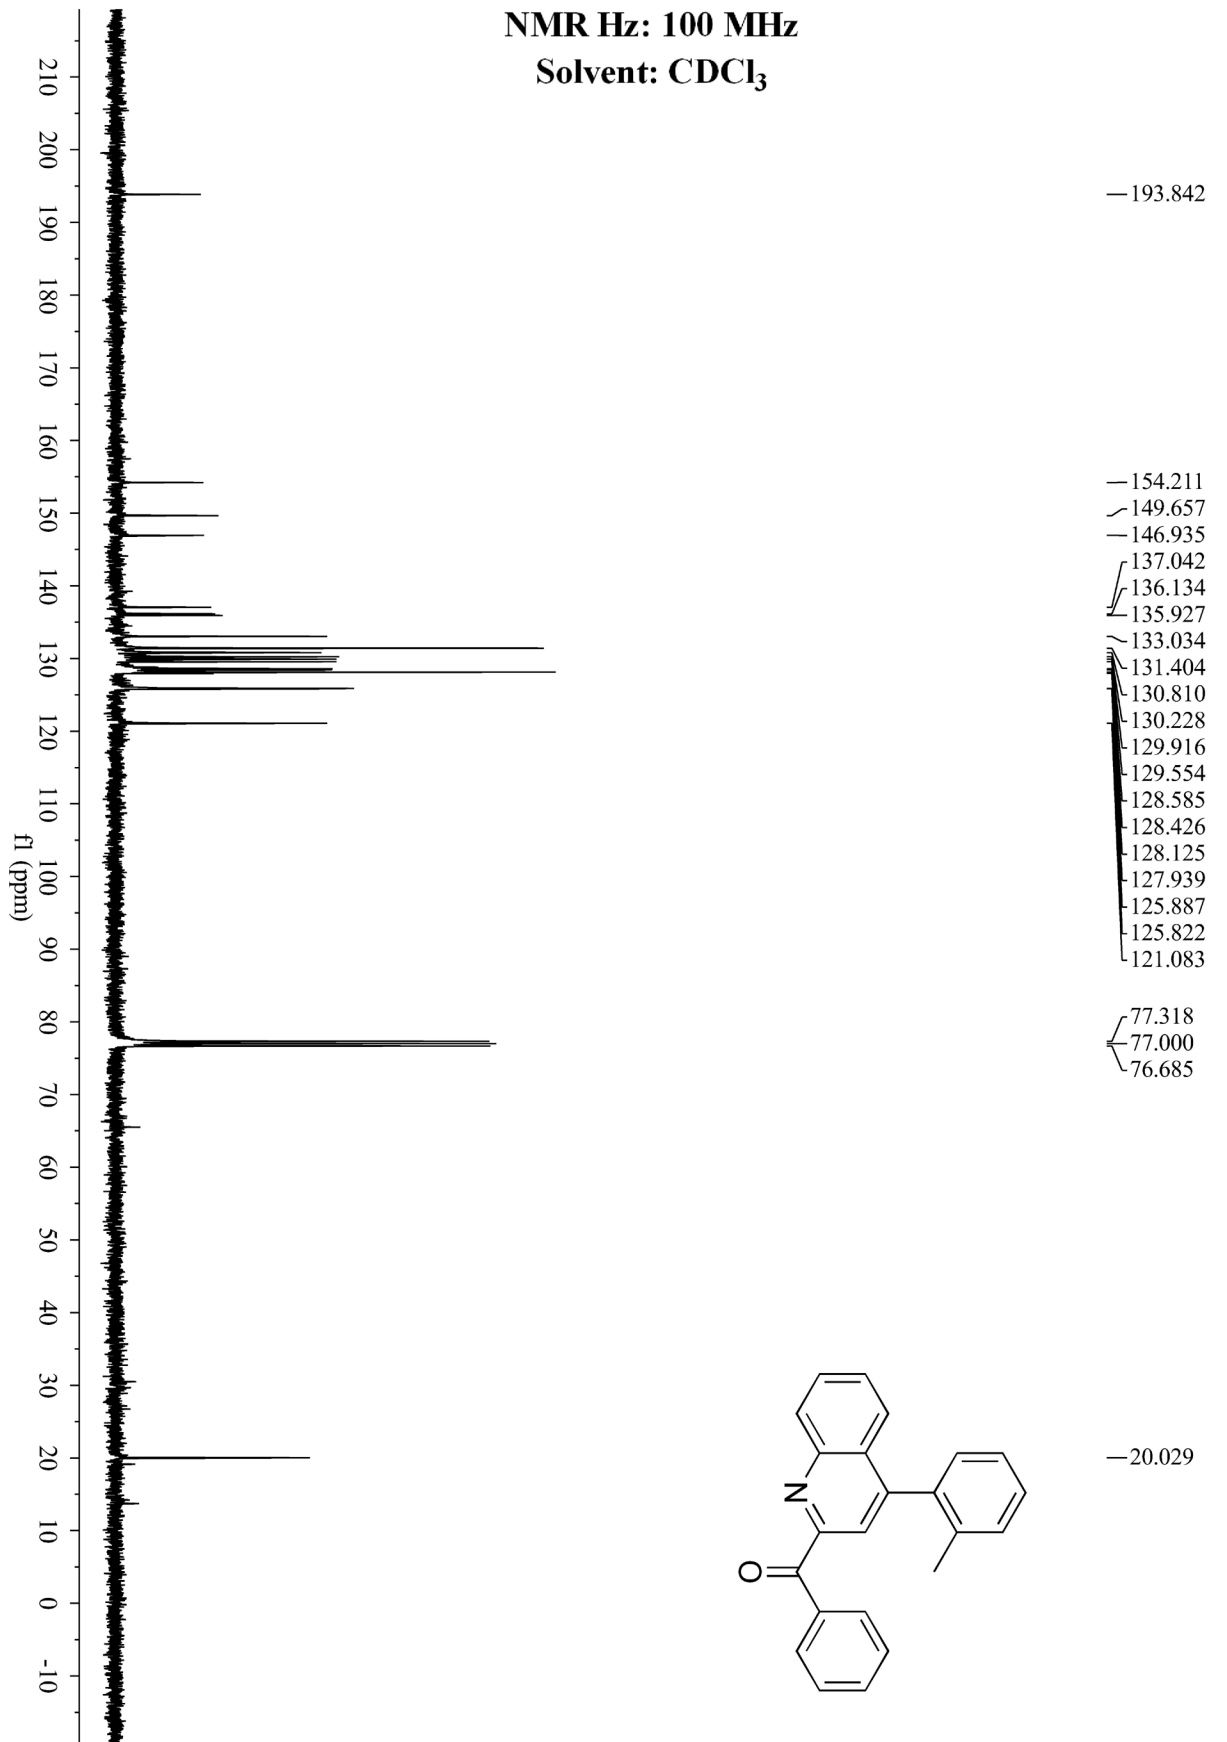

# 1,3,3-Triphenylprop-2-en-1-one (6)

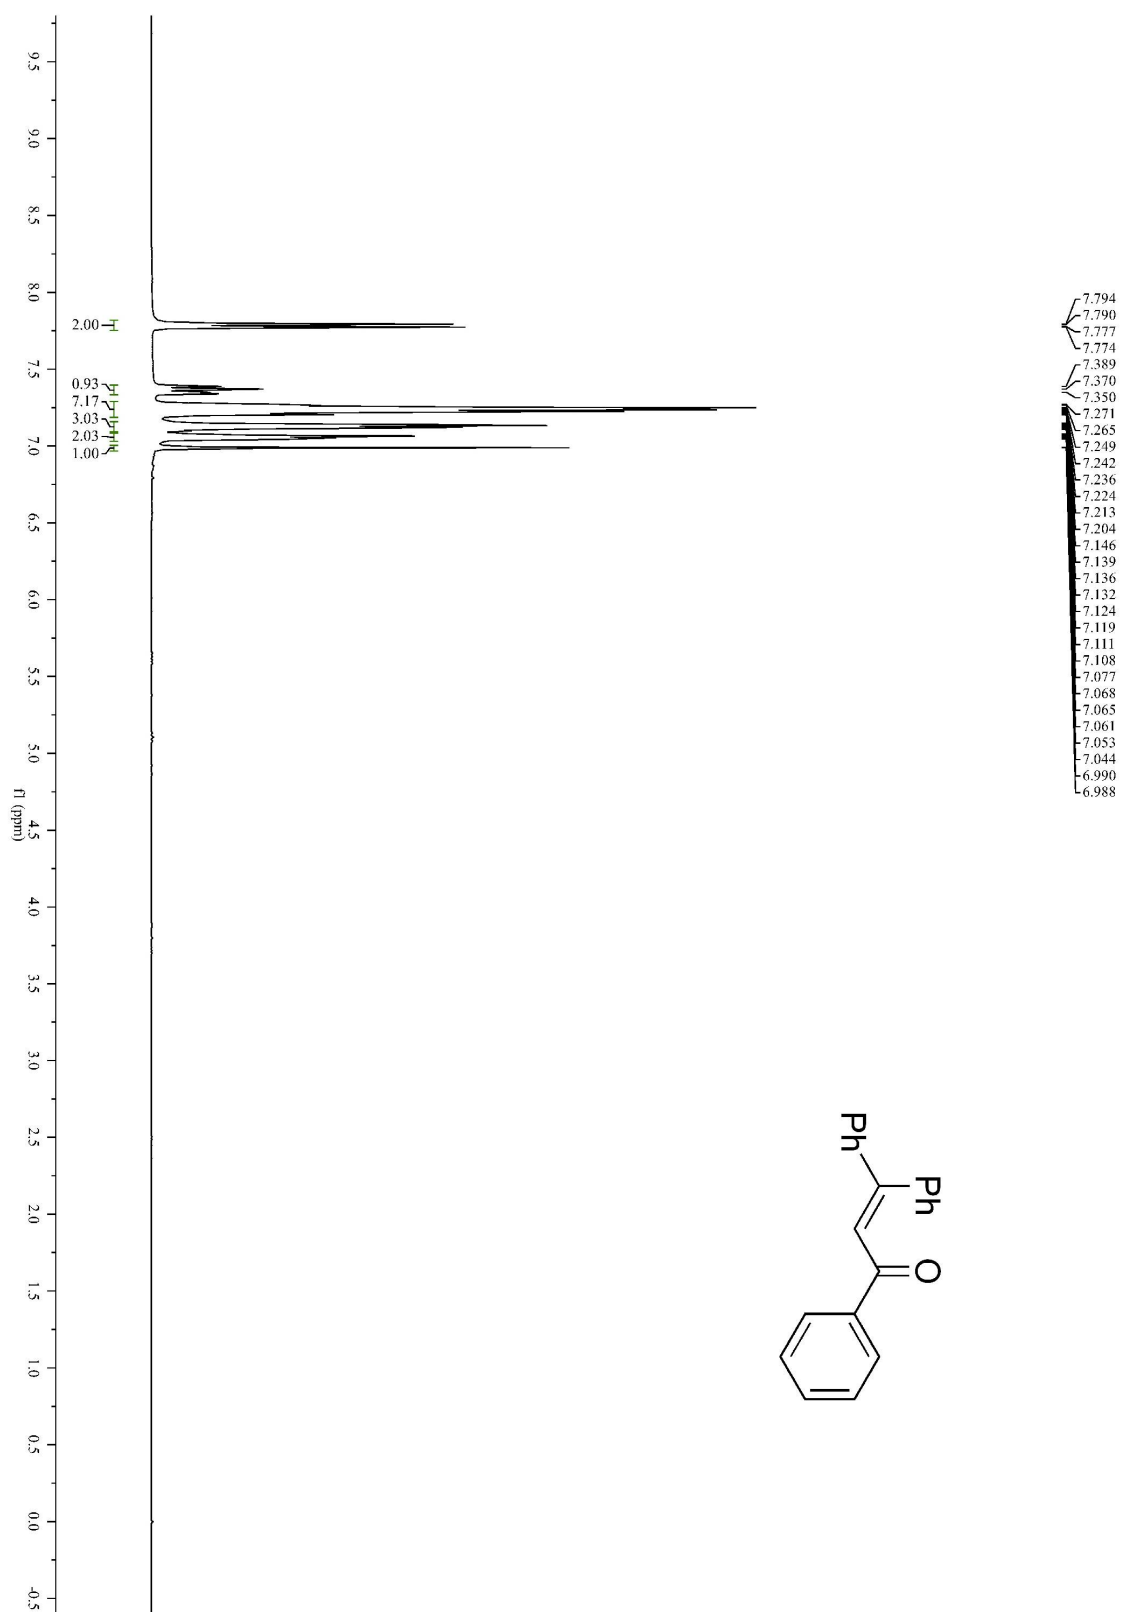

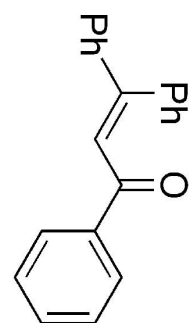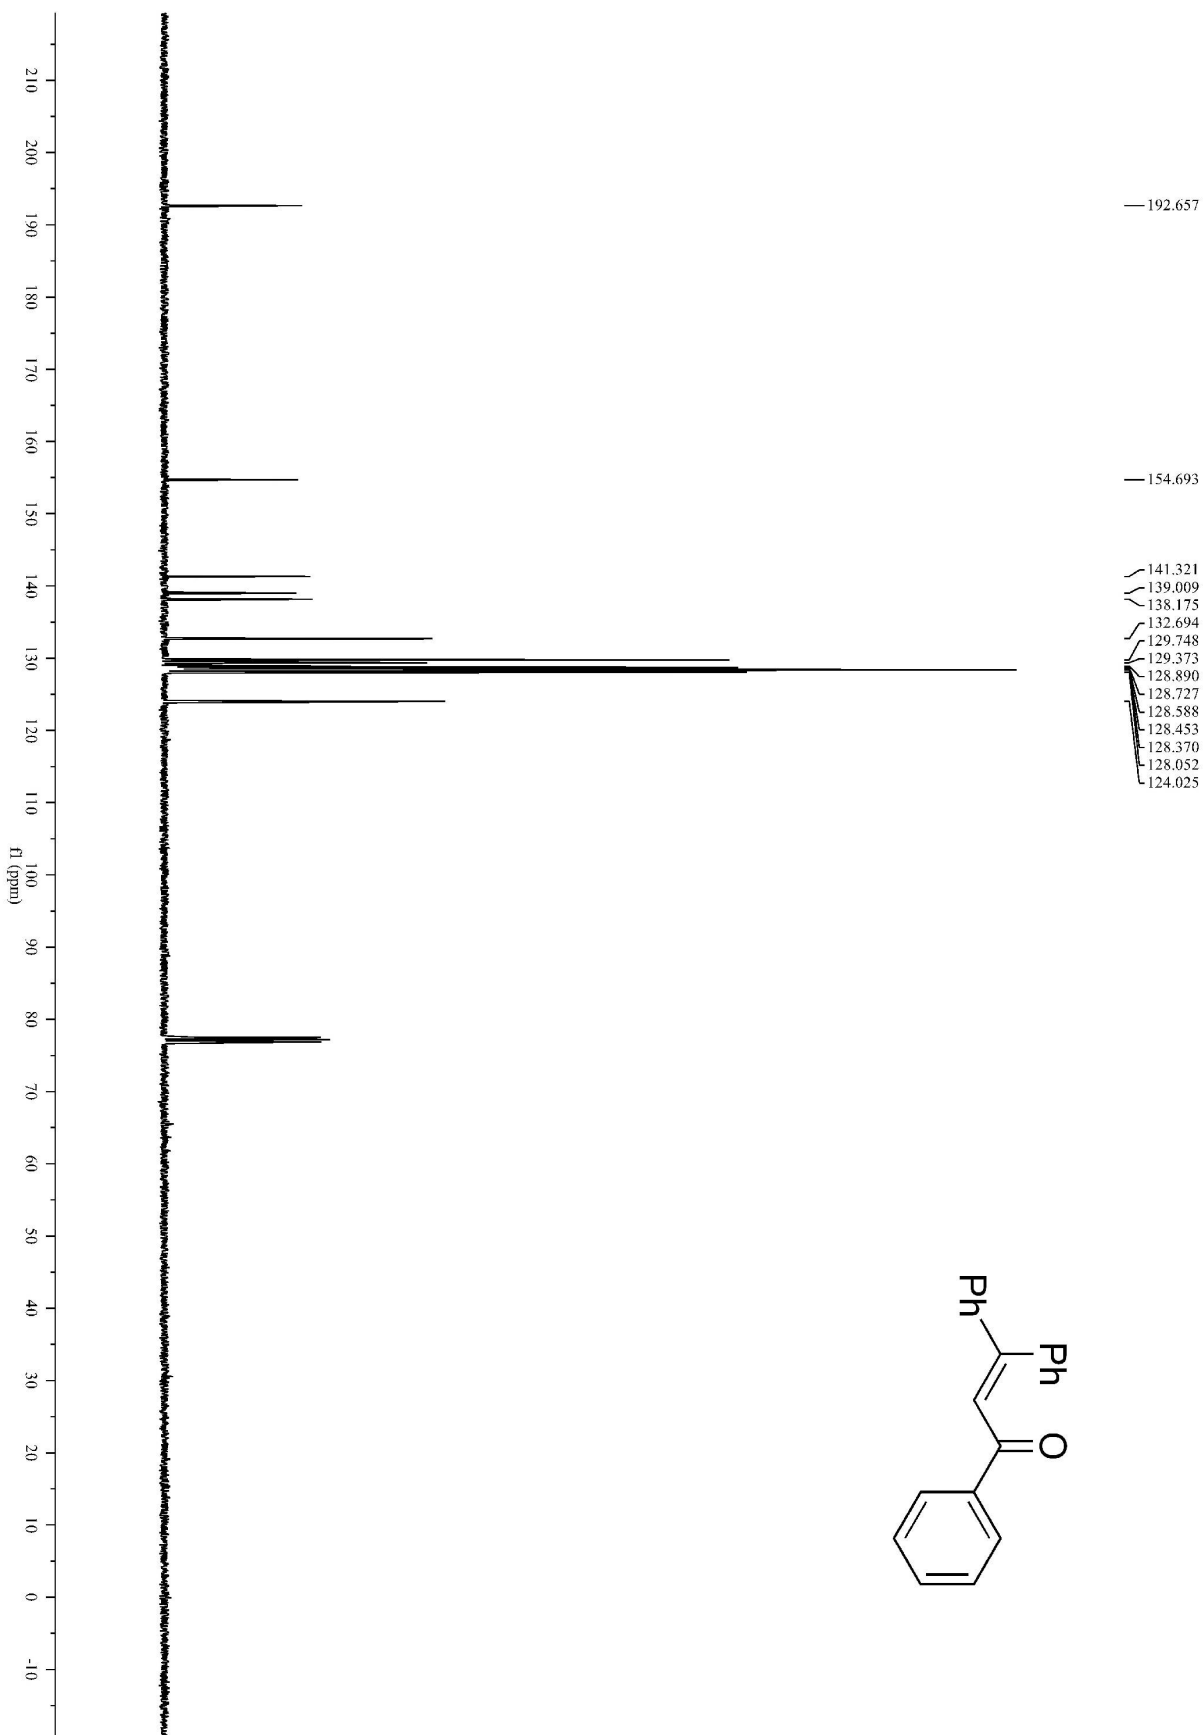

Supplement: d3ob01915b1.pdf [file d3ob01915b1.pdf]
